# Supplementary material for: Effects of medical and non-medical cannabis use in older adults: protocol for a scoping review
Source: PubMed Central journal article supplement — BMJ Open. 2020 Feb 28;10(2):e034301. doi: 10.1136/bmjopen-2019-034301 (PMC7050329; doi:10.1136/bmjopen-2019-034301), 2020-02-28
Supplement: bmjopen-2019-034301.draft_revisions.pdf [file bmjopen-2019-034301.draft_revisions.pdf]

# BMJ Open

BMJ Open is committed to open peer review. As part of this commitment we make the peer review history of every article we publish publicly available.

When an article is published we post the peer reviewers' comments and the authors' responses online. We also post the versions of the paper that were used during peer review. These are the versions that the peer review comments apply to.

The versions of the paper that follow are the versions that were submitted during the peer review process. They are not the versions of record or the final published versions. They should not be cited or distributed as the published version of this manuscript.

BMJ Open is an open access journal and the full, final, typeset and author-corrected version of record of the manuscript is available on our site with no access controls, subscription charges or pay-per-view fees (<http://bmjopen.bmj.com>).

If you have any questions on BMJ Open's open peer review process please email [info.bmjopen@bmj.com](mailto:info.bmjopen@bmj.com)

# BMJ Open

## The effects of medical and non-medical cannabis use in older adults: protocol for a scoping review

|                               |                                                                                                                                                                                                                                                                                                                                                                                                                                                                                                                                                                                                                                                                                                                                                                                                                                                                                                                                                                                                                                                                                                                                                                                                                                                                    |
|-------------------------------|--------------------------------------------------------------------------------------------------------------------------------------------------------------------------------------------------------------------------------------------------------------------------------------------------------------------------------------------------------------------------------------------------------------------------------------------------------------------------------------------------------------------------------------------------------------------------------------------------------------------------------------------------------------------------------------------------------------------------------------------------------------------------------------------------------------------------------------------------------------------------------------------------------------------------------------------------------------------------------------------------------------------------------------------------------------------------------------------------------------------------------------------------------------------------------------------------------------------------------------------------------------------|
| Journal:                      | <i>BMJ Open</i>                                                                                                                                                                                                                                                                                                                                                                                                                                                                                                                                                                                                                                                                                                                                                                                                                                                                                                                                                                                                                                                                                                                                                                                                                                                    |
| Manuscript ID                 | bmjopen-2019-034301                                                                                                                                                                                                                                                                                                                                                                                                                                                                                                                                                                                                                                                                                                                                                                                                                                                                                                                                                                                                                                                                                                                                                                                                                                                |
| Article Type:                 | Protocol                                                                                                                                                                                                                                                                                                                                                                                                                                                                                                                                                                                                                                                                                                                                                                                                                                                                                                                                                                                                                                                                                                                                                                                                                                                           |
| Date Submitted by the Author: | 13-Sep-2019                                                                                                                                                                                                                                                                                                                                                                                                                                                                                                                                                                                                                                                                                                                                                                                                                                                                                                                                                                                                                                                                                                                                                                                                                                                        |
| Complete List of Authors:     | <p>Wolfe, Dianna; Ottawa Hospital Research Institute, Ottawa Methods Centre<br/> Corace, Kimberly; University of Ottawa,<br/> Rice, Danielle<br/> Smith, Andra; University of Ottawa, Brain and Mind Research Institute<br/> Kanji, Salmaan; The Ottawa Hospital, Department of Pharmacy;<br/> University of Ottawa, Faculty of Medicine<br/> Conn, David; University of Toronto, Psychiatry<br/> Willows, Melanie; The Royal Ottawa Mental Health Centre, Substance Use and Concurrent Disorders Program<br/> Garber, Gary; Public Health Ontario, Infection Prevention and Control;<br/> University of Ottawa Faculty of Medicine, Medicine/infectious diseases<br/> Puxty, John; Queen's University, Faculty of Medicine<br/> Moghadam, Esther; Ottawa Public Health<br/> Skidmore, Becky; Independent Information Specialist<br/> Garritty, Chantelle; Ottawa Hospital Research Institute, Knowledge Synthesis Group; Ottawa Methods Centre, Ottawa Hospital Research Institut</p> <p>Thavorn, Kednapa; Institute for Clinical Evaluative Sciences, ICES @uOttawa; The Ottawa Hospital Research Institute,<br/> Moher, David; Ottawa Hospital Research Institute, Ottawa Methods Centre<br/> Hutton, Brian; University of Ottawa, Ottawa, Ontario, Canada,</p> |
| Keywords:                     | PUBLIC HEALTH, EPIDEMIOLOGY, GERIATRIC MEDICINE                                                                                                                                                                                                                                                                                                                                                                                                                                                                                                                                                                                                                                                                                                                                                                                                                                                                                                                                                                                                                                                                                                                                                                                                                    |
|                               |                                                                                                                                                                                                                                                                                                                                                                                                                                                                                                                                                                                                                                                                                                                                                                                                                                                                                                                                                                                                                                                                                                                                                                                                                                                                    |

SCHOLARONE™  
Manuscripts

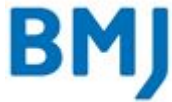

I, the Submitting Author has the right to grant and does grant on behalf of all authors of the Work (as defined in the below author licence), an exclusive licence and/or a non-exclusive licence for contributions from authors who are: i) UK Crown employees; ii) where BMJ has agreed a CC-BY licence shall apply, and/or iii) in accordance with the terms applicable for US Federal Government officers or employees acting as part of their official duties; on a worldwide, perpetual, irrevocable, royalty-free basis to BMJ Publishing Group Ltd ("BMJ") its licensees and where the relevant Journal is co-owned by BMJ to the co-owners of the Journal, to publish the Work in this journal and any other BMJ products and to exploit all rights, as set out in our [licence](#).

The Submitting Author accepts and understands that any supply made under these terms is made by BMJ to the Submitting Author unless you are acting as an employee on behalf of your employer or a postgraduate student of an affiliated institution which is paying any applicable article publishing charge ("APC") for Open Access articles. Where the Submitting Author wishes to make the Work available on an Open Access basis (and intends to pay the relevant APC), the terms of reuse of such Open Access shall be governed by a Creative Commons licence – details of these licences and which [Creative Commons](#) licence will apply to this Work are set out in our licence referred to above.

Other than as permitted in any relevant BMJ Author's Self Archiving Policies, I confirm this Work has not been accepted for publication elsewhere, is not being considered for publication elsewhere and does not duplicate material already published. I confirm all authors consent to publication of this Work and authorise the granting of this licence.

# The effects of medical and non-medical cannabis use in older adults: protocol for a scoping review

## Authorship List:

\*Wolfe DM<sup>1</sup> ([dwolfe@ohri.ca](mailto:dwolfe@ohri.ca)); \*Corace K<sup>1,2,3,4</sup> ([kim.corace@theroyal.ca](mailto:kim.corace@theroyal.ca)); Rice DB<sup>1,5</sup> ([danielle.rice@mail.mcgill.ca](mailto:danielle.rice@mail.mcgill.ca)); Smith A<sup>6</sup> ([andra.smith@uottawa.ca](mailto:andra.smith@uottawa.ca)); Kanji S<sup>1,7</sup> ([skanji@toh.ca](mailto:skanji@toh.ca)); Conn D<sup>8</sup> ([dconn@baycrest.org](mailto:dconn@baycrest.org)); Willows M<sup>2,3,4</sup> ([melanie.willows@theroyal.ca](mailto:melanie.willows@theroyal.ca)); Garber G<sup>9</sup> ([gary.garber@oahpp.ca](mailto:gary.garber@oahpp.ca)); Puxty J<sup>10</sup> ([puxtyj@providencecare.ca](mailto:puxtyj@providencecare.ca)); Moghadam E<sup>11</sup> ([esther.moghadam@ottawa.ca](mailto:esther.moghadam@ottawa.ca)); Skidmore B<sup>1</sup> ([bskidmore@rogers.com](mailto:bskidmore@rogers.com)); Garritty C<sup>1</sup> ([cgarritty@ohri.ca](mailto:cgarritty@ohri.ca)); Thavorn K<sup>1,12</sup> ([kthavorn@ohri.ca](mailto:kthavorn@ohri.ca)); Moher D<sup>1,12</sup> ([dmoher@ohri.ca](mailto:dmoher@ohri.ca)); Hutton B<sup>1,12</sup> ([bhutton@ohri.ca](mailto:bhutton@ohri.ca))

## Affiliations

<sup>1</sup>Ottawa Hospital Research Institute, Ottawa, Canada

<sup>2</sup>University of Ottawa, Faculty of Medicine, Department of Psychiatry, Ottawa, Canada

<sup>3</sup>University of Ottawa Institute of Mental Health Research, Ottawa, ON, Canada

<sup>4</sup>The Royal Ottawa Mental Health Centre, Ottawa, ON, Canada

<sup>5</sup>McGill University Department of Psychology, Montreal, Canada

<sup>6</sup>University of Ottawa, Brain and Mind Research Institute

<sup>7</sup>The Ottawa Hospital, Department of Pharmacy, Ottawa, Canada

<sup>8</sup>University of Toronto, Department of Psychiatry

<sup>9</sup>Public Health Ontario, Toronto, Ontario

<sup>10</sup>Queen's University, Faculty of Medicine, Kingston, Canada

<sup>11</sup>Ottawa Public Health, Ottawa, Canada

<sup>12</sup>University of Ottawa, School of Epidemiology and Public Health, Ottawa, Canada

\*denotes co-first authors; contributed equally to the planned research

## Corresponding Author:

Dr. Brian Hutton

Center for Practice Changing Research

The Ottawa Hospital

501 Smyth Road, PO Box 201B,

Ottawa, ON, K1H 8L6

Email: [bhutton@ohri.ca](mailto:bhutton@ohri.ca)

Phone: 613-737-8899, ext 73842

## Publication Details

Abstract Word Count: 301

Main Text Word Count: 5,224

## **ABSTRACT**

**Introduction.** With its legalization and regulation in Canada in 2018, the proportion of Canadians reporting cannabis use in 2019 increased substantially over the previous year, with half of new users being aged 45+ years. While use in older adults has been low historically, as baby boomers age, this demographic will progressively have more liberal attitudes, prior cannabis exposure and higher use rates. However, older adults experience slower metabolism, increased likelihood of polypharmacy, cognitive decline and chronic physical/mental health problems. There is a need to enhance knowledge of the effects of cannabis use in older adults. The following questions will be addressed using a scoping review approach: (1) What evidence exists regarding beneficial and harmful effects of medical and non-medical cannabis use in adults  $\geq 50$  years of age? (2) What is known about the beneficial and harmful effects of medical and non-medical cannabis use in older adults regarding: age, sex/gender, race/ethnicity, mental/physical comorbidities, use of other substances, consumption method, residential setting, employment status, marital status, accommodation status?

**Methods and Analysis.** Methods for scoping reviews outlined by Arksey & O'Malley and the Joanna Briggs Institute will be used. A librarian will design a systematic search of the literature for reviews, randomized trials, non-randomized trials, and observational studies of cannabis use. Eligibility criteria will be older adult participants, currently using cannabis (medical or non-medical), with studies required to report a cannabis-related health outcome to be eligible. Two reviewers will screen citations and full texts, with support from artificial intelligence. Two reviewers will chart data. Tables/graphics will be used to map evidence and identify evidence gaps.

1  
2  
3 ***Ethics and Dissemination.*** This research will enhance awareness of existing evidence addressing  
4 the health effects of medical and non-medical cannabis use in older adults. Findings will be  
5 disseminated through a peer reviewed publication, conference presentations and a stakeholder  
6 meeting.  
7  
8  
9  
10  
11  
12  
13  
14  
15  
16

17 **Keywords:** *medical cannabis; recreational cannabis; cannabis; elderly; seniors; scoping review;*  
18 *knowledge synthesis*  
19  
20  
21  
22  
23  
24  
25  
26  
27  
28  
29  
30  
31  
32  
33  
34  
35  
36  
37  
38  
39  
40  
41  
42  
43  
44  
45  
46  
47  
48  
49  
50  
51  
52  
53  
54  
55  
56  
57  
58  
59  
60

## **STRENGTHS AND LIMITATIONS OF THE STUDY**

- This study will use a rigorous approach to scoping reviews to explore the health effects (both beneficial and harmful) of cannabis in the elderly, addressing a currently important knowledge gap for this population.
- The research is timely importance given emerging legalization of cannabis, and will address a large volume of literature which has not previously been synthesized.
- The proposal and protocol for this research have been designed by a broad group of experts in psychology, addiction medicine, mental health, knowledge synthesis, epidemiology, public health and knowledge translation, and will inform evidence needs for a range of vital knowledge users. Findings from the review will be discussed and interpreted collaboratively with team members holding a wealth of expertise and will help to prioritize future research.
- The final report will be prepared according to current best practices for reporting of scoping reviews, namely the PRISMA Extension Statement for scoping reviews.
- As this is a scoping review rather than a systematic review, formal quality assessments of all included studies will not be carried out.

## **INTRODUCTION**

Until it was legalized in 2018, cannabis was the most widely used illicit substance in Canada [1]. However, many of the health impacts of cannabis, both positive and negative, have yet to be rigorously studied, given the ethics of conducting randomized controlled trials (RCTs) on illicit substances. Legalization has increased access to cannabis, resulting in potential benefits as well as potential harms to consumers, including, but not limited to increased risks of substance use disorder, accidents, injuries, and presentations to emergency departments [2,3]. These potential harms extend across all age groups. However, the effects of the aging process may mediate many cannabis-related harms in older adults that are not experienced in younger age groups. Although the proportion of middle-aged to older adults reporting cannabis use was relatively low prior to legalization in October 2018—9% amongst those 45 years and older, in early 2018 [4]—it has risen markedly in the months since legalization, to 14% in the first quarter of 2019 [4]. In addition to legalization, as the large baby boomer cohort ages, it brings with it more liberal attitudes, prior exposure to cannabis, and higher use rates [5]. Despite rising usage rates in this age group, the depth of available evidence regarding the health impacts of cannabis use in older adults is not known.

Cannabinoids are active at the endocannabinoid system (ECS), a series of neuromodulatory lipids and receptors located throughout the central and peripheral nervous systems, immune and hematopoietic systems, and many peripheral organs [6]. The presence of the ECS throughout the body implies the potential for widespread effects of cannabinoids, both beneficial and harmful. Delta-9 tetrahydrocannabinol (THC) and cannabidiol (CBD) are the predominant components of most cannabis products [7]. As well as some potential therapeutic benefits, THC is responsible for the intoxication and dependence associated with cannabis use and is the primary psychoactive



1  
2  
3 component of natural cannabis [7]. In contrast, CBD has no intoxicating effects or abuse liability,  
4  
5 and because of its widespread activity in the ECS, it has been proposed to be beneficial  
6  
7 therapeutically for a variety of health conditions [7]. Numerous potential therapeutic indications  
8  
9 for medical cannabis have been evaluated in the literature, including but not limited to the control  
10  
11 of nausea and vomiting associated with chemotherapy, relief of spasticity in multiple sclerosis  
12  
13 patients, prevention of graft-versus-host disease in allogeneic hematopoietic stem cell  
14  
15 transplantation, control of epilepsy and schizophrenia, ocular pressure reduction in glaucoma,  
16  
17 HIV/AIDS-associated weight loss, and the control of central, peripheral, and chronic neuropathic  
18  
19 pain of various etiologies [8,9]. As with many novel interventions, the results have varied by  
20  
21 indication, with demonstrable benefits over harms for only some indications. Cannabis as a  
22  
23 medical product became possible with the purification of whole plant extracts from *Cannabis*  
24  
25 *sativa L.*, including the THC equivalent Tetrabinex, the CBD equivalent Nabidiolex, and  
26  
27 nabiximols, a product containing THC and CBD in a 1:1 ratio [8]. Medical cannabis has been  
28  
29 furthered through the development of various synthetic cannabinoids (e.g., the synthetic THC  
30  
31 analogue, nabilone, and synthetic THC, dronabinol) [9]. Synthetic modification of the molecular  
32  
33 structure of THC and CBD to create new synthetic molecules has the potential to widen the range  
34  
35 of available cannabis products for medical and non-medical use and their effects on the body.  
36  
37  
38  
39  
40  
41  
42

43 Generally, older adults suffer from more chronic medical and mental health conditions (e.g.,  
44  
45 chronic pain, insomnia) than younger adults, and the prevalence of anxiety disorders is high.  
46  
47 Anecdotal reports suggest that older adults may be attracted to cannabis as a means to ameliorate  
48  
49 symptoms of these chronic conditions [10]. As well, lifestyle changes that frequently occur in older  
50  
51 adulthood, such as retirement or loss of a spouse, may lead to social isolation, increased leisure  
52  
53 time, or loss of meaningful work, and contribute to increased cannabis use [10]. However, while  
54  
55  
56  
57

1  
2  
3 cannabis may be perceived by some patients to improve physical or mental health symptoms, older  
4 adults using cannabis either medically or recreationally may be unaware of changes that occur with  
5 age that may lead to varying and potentially harmful effects. Past research has demonstrated that  
6 cognitive function, attention, memory, and executive function—including abilities for impulse  
7 control, problem solving, and reasoning—are reduced with increasing age, and that consumption  
8 of drugs, including cannabis, has been associated with worsening and/or pronouncement of these  
9 deteriorations [11]. Aging is also associated with structural changes to both gray and white brain  
10 matter that correlate with brain function [12], and the use of cannabis can exacerbate these  
11 structural changes. Polypharmacy of prescription medications is widespread in the older adult  
12 population [13], and there is some evidence of negative drug interactions between cannabis and  
13 prescription and non-prescription medications [14–17], another important consideration for older  
14 adults. Finally, age-related alterations in the pharmacokinetics of drugs can have a direct impact  
15 on the psychoactive effects sought by recreational users, the beneficial health effects sought by  
16 medicinal users, and the harmful side-effects potentially experienced by both [11,18].

17  
18  
19 Age-related changes to the brain and pharmacodynamics suggest that there may be many important  
20 differences in the effects of cannabis in older adults compared to younger cohorts. However, the  
21 literature related to this research is diverse and vast. Although systematic and scoping reviews  
22 have been conducted on cannabis use in younger age groups [19–23], there remains a need for a  
23 collation and mapping of all research conducted on cannabis effects in older adults for the purposes  
24 of informing care, developing policy, and directing future research and synthesis efforts. A recent  
25 overview of systematic reviews evaluating the effectiveness of medical cannabis for any indication  
26 identified 73 relevant reviews [24], of which one was identified as highly relevant to older adults

[25]. In the planned research, we will conduct a scoping review of systematic reviews, RCTs, non-randomized studies (NRS) and observational studies to address the following research questions:

What sources and types of evidence exist regarding the beneficial and harmful effects of medical and non-medical cannabis use in older adults?

What is known from the existing literature about the beneficial and harmful effects of medical and non-medical cannabis use in older adults in the following sub-populations, concepts, and contexts:

- Age: 50–64 years, 65–74 years, 75+ years of age?
- Sex or gender?
- Race or ethnicity?
- Mental or physical comorbidities?
- Frailty?
- Use of other prescription or non-prescription drugs, alcohol, or illicit substances?
- Consumption method (i.e., smoking, vaporizing, oils, edibles, etc.)?
- Residential setting (e.g., community, retirement home, long-term care)?
- Employment status (e.g., working, retired) or income level?
- Marital status (e.g., single, married, widowed, divorced)?
- Accommodation status (i.e., alone, shared, homeless)?

## **METHODS AND ANALYSIS**

This research will be undertaken using a scoping review approach, underpinned by the framework proposed by Arskey and O'Malley [26]. A scoping review maps the existing sources and types of evidence in a field of interest, and can be used to summarize and disseminate research findings to knowledge users [26]. Our methods will be guided by several resources, including the scoping

1  
2  
3 review methodology manual published by the Joanna Briggs Institute (JBI) [27] and other recent  
4  
5 methods guidance [28–30].  
6  
7

## 8 9 **Protocol and Registration**

10 This protocol has been drafted to adhere to the Preferred Reporting Items for Systematic Reviews  
11 and Meta-analysis Protocols (PRISMA-P; **Appendix 1**). The protocol has been registered with the  
12  
13 Open Science Framework. Given the reflexive and iterative nature of scoping reviews [26],  
14  
15 amendments to the registered protocol are anticipated and will be described in the final study  
16  
17 report.  
18  
19  
20  
21  
22

## 23 **Eligibility Criteria**

24 Following the guidance of Arskey and O'Malley, our eligibility criteria will be adjusted as we  
25  
26 develop familiarity and further expertise with the literature. We based our eligibility criteria on the  
27  
28 PCC (Participants – Concept – Context) criteria [27] as follows:  
29  
30

- 31  
32 • **Participants.** Adults aged 50 years and older of any sex/gender or race, with current  
33  
34 cannabis use.  
35  
36  
37 • **Age:** Studies or systematic reviews not explicitly reporting age data but evaluating  
38  
39 patients with dementia/Alzheimer's disease, Parkinson's disease, or advanced or  
40  
41 end-stage cancer will be included. In a recent review of cannabinoids in palliative  
42  
43 medicine, included studies had age ranges >50 years when the population evaluated  
44  
45 was patients with Alzheimer's disease or cancer-related pain, anorexia/cachexia,  
46  
47 nausea and vomiting, or sleep disturbance [31]. More conditions specific to older  
48  
49 adults may be identified as we progress through the review. Given that many studies  
50  
51 will include patients both younger and older than 50 years of age, we will include  
52  
53 studies that report age-stratified analyses for an age group of 50 years or older. If  
54  
55  
56  
57

1  
2  
3 age-stratified findings are not reported in a primary study, but 80% or more of the  
4 sample is 50 years of age or older, the study will be included. Similarly, if age data  
5 are not reported but patients with any of the health conditions identified above are  
6 included amongst patients with other health conditions, to be included, the study  
7 must have reported a condition-stratified analysis or 80–100% of the patients must  
8 have one of the identified conditions. *For the purposes of this protocol, “older  
9 adult studies” are those in which (a) 80–100% of the sample is 50+ years of age,  
10 (b) if age data are not reported, 80–100% of the sample has dementia/Alzheimer’s  
11 disease, Parkinson’s disease, or advanced/end-stage cancer, or (c) an age- or  
12 condition-stratified analysis is reported for an age group over 50 years or one of  
13 the identified conditions.*

- 24 • **Current use:** The definition of “current use” will be variable across studies;  
25 however, we will not include studies evaluating use more than one year in the past.  
26 Older adults who are ex-users but are not currently using will not be of interest  
27 (e.g., those who used as adolescents). Patients with or without a mental or physical  
28 health comorbidity will be included. Studies and reviews evaluating younger as  
29 well as older adults will be included, if data have been reported for an age group of  
30 50 years or older.
- 31 • **Comorbidities:** Examples of comorbidities include cancer (active or in remission),  
32 chronic pain, diabetes, anxiety, cognitive decline, dementia, depression, insomnia,  
33 post-traumatic stress disorder, and schizophrenia.
- 34 • **Concept.** The concept of relevance for the review is characterized below in terms of both  
35 the interventions and outcomes of interest for this research, and are as follows:

- 1  
2  
3  
4  
5  
6  
7  
8  
9  
10  
11  
12  
13  
14  
15  
16  
17  
18  
19  
20  
21  
22  
23  
24  
25  
26  
27  
28  
29  
30  
31  
32  
33  
34  
35  
36  
37  
38  
39  
40  
41  
42  
43  
44  
45  
46  
47  
48  
49  
50  
51  
52  
53  
54  
55  
56  
57  
58  
59  
60
- **Interventions:** Medical (i.e., either under the care of a medical professional or patient-defined) or non-medical cannabis, of any type, with any mode of consumption (e.g., smoking, vaporizing, oils, edibles), and any dosage will be included. All types of cannabis will be of interest, including whole-plant cannabis; purified whole-plant extracts from *Cannabis sativa L.* (e.g., Nabidiolex (purified CBD), Tetrabinex (purified THC), Sativex (purified 1:1 THC:CBD)); synthetic cannabinoids, such as synthetic THC (e.g., dronabinol, nabilone), CBD, and their derivatives, developed through modification of the molecular structure; and other cannabinoids, whether found in the cannabis plant or elsewhere, that are not THC or CBD but that interact with the ECS [32].
  - **Outcomes:** Both beneficial and harmful effects of cannabis use on physical and mental health will be considered. These will include but not be limited to the following:
    - harmful physical health effects (e.g., falls, fractures, head injuries, emergency department visits, car accidents, cardiovascular effects, respiratory effects, non-adherence to other drugs);
    - beneficial physical effects (e.g., improvements in nausea, vomiting, pain, muscle spasticity, tremors, quality of life);
    - harmful mental health and behavioural outcomes (e.g., increased risky, manic, and suicidal behaviours; increased cannabis use disorder, cannabis abuse, cannabis dependence, or “problematic” cannabis use; increased or new anxiety, paranoia/psychosis, delirium, depression, sleep disturbance, reduced quality of life);

- beneficial mental health and behavioural outcomes (e.g., decreased risky, manic, and suicidal behaviours; decreased cannabis use disorder, cannabis abuse, cannabis dependence, or the word “problematic” or “problem” in juxtaposition to the phrase “cannabis use;” decreased anxiety, paranoia, delirium, depression, chronic pain, sleep, improved quality of life, improved post-traumatic stress disorder);
- physical brain outcomes (e.g., effects on gray matter, white matter integrity, functional connectivity, cortical thickness, total and regional volumes, surface morphometry/shape);
- pharmacokinetic impacts (e.g., comparative pharmacokinetics of cannabis in older vs younger adults, drug interactions between cannabis and other prescription/non-prescription/illicit drugs).

We will exclude single-arm studies that only report prevalence or incidence of cannabis use.

- **Context.** Only studies focused on current cannabis consumption will be eligible. All settings are of interest in any geographic area. Consumption of other illicit or prescribed pharmaceuticals will be allowed. All periods of time and duration of follow-up will be eligible.
- **Types of studies.** Systematic reviews, randomized controlled trials (RCTs), NRSs, and observational studies will be included. We will exclude diagnostic test accuracy studies, and studies developing or validating diagnostic criteria for cannabis use disorder or other cannabis-related mental health disorders. Editorials, letters, commentaries, abstracts, case reports, and narrative reviews will also be excluded. Only English and French publications

1  
2  
3 will be considered for reasons of timeliness and cost. Grey literature will not be reviewed  
4  
5 given the anticipated volume of peer-reviewed literature to be screened (based on our  
6  
7 preliminary search) as well as timeline and budget considerations.  
8  
9

10  
11 We will define a systematic review as being a review with a clearly specified review question that  
12  
13 incorporates a systematic search of two or more electronic literature databases, clearly defined  
14  
15 eligibility criteria, systematic study selection and data collection by two or more reviewers, an  
16  
17 appraisal of the risk of bias of included studies, and a synthesis of all information using a  
18  
19 quantitative or qualitative approach. Review articles not meeting these criteria will be excluded.  
20  
21 Non-randomized studies may include non-randomized, quasi-randomized, or single-arm trials  
22  
23 (e.g., Phase I trials). Observational studies of any design will be included, except case reports and  
24  
25 case series of fewer than 25 patients. Qualitative studies will be excluded.  
26  
27  
28  
29

### 30 **Information Sources and Search Strategy**

31  
32 Preliminary basic searches of the literature identified an extremely high volume of references  
33  
34 relevant to medical and non-medical cannabis (e.g., >120,000 records). We will work closely with  
35  
36 an experienced information specialist to iteratively develop a search strategy that will balance the  
37  
38 need for inclusivity with the need to yield a citation volume that will be manageable with current  
39  
40 reference management software, within the budgetary and time constraints of the review. To  
41  
42 balance these opposing needs, many alternative strategies will be considered, including restriction  
43  
44 on date of publication, and application of filters for participant age (i.e.,  $\geq 50$  years of age) or study  
45  
46 designs of interest to the identified cannabis literature base.  
47  
48  
49  
50  
51  
52  
53  
54  
55  
56  
57  
58  
59  
60



1  
2  
3 Using the OVID platform, we will search Ovid MEDLINE®, including Epub Ahead of Print and  
4 In-Process & Other Non-Indexed Citations, Embase Classic+Embase, and PsycINFO. We will  
5 also search the Cochrane Library on Wiley.  
6  
7

8  
9  
10 Search strategies will utilize a combination of controlled vocabulary (e.g., “*cannabis*,”  
11 “*cannabinoids*,” “*marijuana use*”) and keywords (e.g., “*marijuana*,” “*CBD*,” “*Sativex*”). Filters  
12 for the research designs of interest will be applied to the Ovid searches. Vocabulary and syntax  
13 will be adjusted across the databases searched as needed. When possible, animal-only, opinion  
14 pieces and case studies will be removed from the search results. Conference abstracts will be  
15 removed from Embase and Cochrane CENTRAL. Specific details regarding the strategies are  
16 provided in **Appendix 2**. The final search strategy will be peer reviewed by another senior  
17 information specialist using the Peer Review of Electronic Search Strategies (PRESS) Checklist  
18 [33].  
19  
20  
21  
22  
23  
24  
25  
26  
27  
28  
29  
30  
31

### 32 **Study Selection Process and Data Management**

33 A sequential approach to study selection will be employed. We will prioritize screening and  
34 selection of systematic reviews first, given they are syntheses of findings from primary research  
35 studies, followed by NRSs and observational studies, and then RCTs. Non-randomized and  
36 observational studies will be prioritized for screening and selection above RCTs due to the  
37 expectation that (a) the majority of relevant recreational cannabis research will not be derived from  
38 RCTs, given the illegality of recreational cannabis throughout much of the world over the last 20  
39 years; and (b) the expectation that much of the evidence pertaining to applications of medical  
40 cannabis from RCTs will be identified in included systematic reviews identified earlier in the study  
41 selection process. We will iteratively adjust our study selection based on the findings from each  
42 search result set, developing stop rules or refining terminology as needed. As noted earlier, any  
43  
44  
45  
46  
47  
48  
49  
50  
51  
52  
53  
54  
55  
56  
57  
58  
59  
60

1  
2  
3 adjustments will be noted in the final study report to maximize transparency in the research  
4  
5 approach.  
6  
7

8  
9 The online systematic review management software DistillerSR® will be used for database  
10  
11 management and study selection (Evidence Partners Incorporated, Ottawa, Canada;  
12  
13 www.evidencepartners.com). Generally, across the study design strata, two levels of reference  
14  
15 screening will be conducted using a priori developed screening forms. A pilot exercise of a random  
16  
17 sample of references will be conducted prior to starting each level to ensure high inter-rater  
18  
19 reliability. Initially, titles and abstracts will be screened, with those references demonstrating  
20  
21 potential relevance progressing to the next level, where their full texts will be assessed for  
22  
23 relevance. At both levels, a liberal accelerated approach will be used: one reviewer will be required  
24  
25 to include a paper, while agreement of two reviewers will be required to exclude [34].  
26  
27 Disagreements during title/abstract screening will result in a reference automatically progressing  
28  
29 to the next level, where the full text will provide more information upon which to base a decision.  
30  
31 At full-text screening, disagreements will be resolved by discussion or by the decision of a third  
32  
33 reviewer.  
34  
35  
36  
37  
38  
39

### 40 **Title/Abstract Screening**

41  
42 Initial screening will be designed to rapidly eliminate clearly irrelevant records. For each study  
43  
44 design dataset, key word searches for terms related to adolescents and young adults will be  
45  
46 conducted in the titles and abstracts, and the references identified by these searches as related to  
47  
48 younger adults/adolescents will be split from the main dataset. Both datasets (i.e., the main dataset  
49  
50 and the younger adult dataset) will be screened separately using the same methods described  
51  
52 below.  
53  
54  
55  
56  
57

1  
2  
3 Systematic review datasets will be screened with two levels of title/abstract screening: Level *Ia*  
4 will screen for terms related to older age and current cannabis use, while Level *Ib* will identify  
5 references with any cannabis-related outcomes. Primary study datasets (i.e., NRS/observational  
6 and RCT) will have a single level of title/abstract screening to identify references of relevance to  
7 older adults, current cannabis use, and any cannabis-related outcome.  
8  
9

10  
11  
12  
13  
14  
15 Studies where relevance to older adults is unclear will be included to allow determination of age  
16 during full-text screening (i.e., if both younger and older patients are included, the reference will  
17 be included at title/abstract screening to determine if disaggregated results were reported in the  
18 full text). For title/abstract screening, the terms “psychedelic” and “hallucinogen” will be eligible;  
19 however, at full-text screening, cannabis use must be explicitly reported. Similarly, for  
20 title/abstract screening, any cannabis-related outcome will be eligible, where cannabis is the  
21 exposure/intervention (i.e., cannabis use should occur prior to the outcome). Case-control studies  
22 where a temporal association is not apparent will be included at title/abstract screening for further  
23 determination during full-text screening. Cannabis use as an outcome will not be eligible (e.g.,  
24 studies evaluating associations between genes and cannabis use, evaluations of interventions to  
25 reduce cannabis use, single-arm studies reporting cannabis prevalence). However, cannabis use  
26 disorder (or similar) as an outcome will be eligible, where different types of cannabis use are  
27 compared as exposures/interventions. Diagnostic test accuracy evaluations and studies developing  
28 or validating diagnostic criteria for cannabis use disorder or other cannabis-related mental health  
29 disorders will be excluded.  
30  
31  
32  
33  
34  
35  
36  
37  
38  
39  
40  
41  
42  
43  
44  
45  
46  
47  
48  
49  
50  
51  
52  
53  
54  
55  
56  
57  
58  
59  
60

## Full-Text Screening

Full-text screening will follow a similar process for all study designs. Initially, references without full texts available in either English or French will be excluded. Subsequently, references that do not report results relevant to older adults will be excluded, followed by those that do not report a relevant cannabis-related outcome, and those in which cannabis use is not current. See the “Eligibility Criteria” section regarding definitions of “older adult study,” “cannabis-related outcome,” and “current cannabis use.” The following criteria are study-design specific:

- Systematic reviews: must report **synthesized** results of older adult studies, whether in terms of a meta-analysis or narrative approach. If a narrative summary was used, it must include either quantitative results or a statement of the direction of effect cannabis use, with or without significance stated. Narrative summaries must appear in the Results section of the review, and not be limited to more general comments within the Discussion section. Reviews that by chance narratively summarize older adult studies, without acknowledging that the patient population was older, will be excluded because the inferences derived from the synthesis by the authors would not have been applied to the context of older adults. For final inclusion, systematic reviews must meet the definition of a systematic review described in the eligibility criteria. Systematic reviews reviewed in full text that reported relevant outcome data for one or more primary studies on older adults amongst many other primary studies on younger adults will be flagged to capture the citations of the older adult primary studies.
- Primary studies: must meet the definition of “older adult studies” as defined in the eligibility criteria.

1  
2  
3 Systematic reviews and primary studies focused strictly on adults over 50 years of age or, if age is  
4 not reported, on one of the eligible health conditions will have higher priority for subsequent data  
5 charting over studies that also include younger adults or other health conditions.  
6  
7  
8  
9

### 10 11 **Use of Artificial Intelligence (AI) Software** 12

13  
14 Given the large number of anticipated search results, especially for the NRS and observational  
15 study stratum (>20,000 records), we will employ artificial intelligence (AI) methods available in  
16 DistillerSR software (Evidence Partners, Incorporated; Ottawa, Canada) where deemed feasible  
17 and reliable to inform the screening process. The available machine learning engines include both  
18 support vector machine (SVM) and Naïve Bayes classifiers. We will manually screen through the  
19 full text level a set of 300 or more references, which will be used to train the combined SVM and  
20 Naïve Bayes classifiers to generate a probability of relevance score valued at 0 (exclude), 0.5  
21 (unclear) or 1 (include) for each reference in the database. These scores will be used to identify  
22 clearly non-relevant citations (i.e., those citations with a probability of 0). These citations will be  
23 grouped to be checked by a second human reviewer to confirm exclusion. The remaining studies  
24 that received probabilities of 0.5 or 1 will be sorted according to their relevance probability  
25 estimated by the empirical Naïve Bayes classifier, which is a continuous score between 0 and 1,  
26 to allow for prioritized screening. The Naïve Bayes classifier will be rerun and citations re-ordered  
27 after batches of 100 citations or more, depending on the size of the database and the inclusion rate.  
28 Prioritized screening will be performed using the liberal accelerated approach described earlier  
29 involving two reviewers, with the prioritized element allowing for earlier identification of eligible  
30 studies. A flow diagram will be presented in all reports to document the process of study selection.  
31  
32  
33  
34  
35  
36  
37  
38  
39  
40  
41  
42  
43  
44  
45  
46  
47  
48  
49  
50  
51  
52  
53  
54  
55  
56  
57  
58  
59  
60

## Data Charting

Included studies will be prioritized for charting by study design. Systematic reviews will be charted first, followed by NRSs and observational studies, then RCTs. RCTs will be charted last, given that most will have already been captured in the data synthesized by the included systematic reviews. Using this approach, if, for example, a large volume of high-quality evidence is identified in systematic reviews related to applications of medical cannabis, it may provide rationale to limit the amount of data extraction from similarly focused RCTs.

A standardized data charting form will be developed in DistillerSR<sup>®</sup> (Evidence Partners Incorporated, Ottawa, Canada; [www.evidencepartners.com](http://www.evidencepartners.com)) that will be refined during the data charting process as reviewers enhance their knowledge of the content area, in keeping with the iterative and reflexive nature of scoping reviews. Prior to data charting from references of a given study design, the charting form will be piloted by all reviewers who will chart data on a random sample of three articles [27]. Given the large number of anticipated included articles, we will (a) consider charting data in stages, starting with study-level data, then progressing to demographic/context data, then outcomes; and (b) have one reviewer chart study-level and demographic/context data, with a second reviewer verifying this information. To minimize errors of subjective interpretation of information that is critical to the review objectives, charting of the outcomes of each study will be conducted independently by two reviewers, followed by conflict resolution by discussion, with input from a third reviewer if necessary [35].

Items for data charting will include the following information:

- **Manuscript/study-level data:** study authors; year of publication; country of study or if not reported, country of first author; funding source; study design (i.e., systematic review,

1  
2  
3 RCT, NRS, observational study); objective; sample size. For systematic reviews, the  
4 number of included studies and patients will be charted.  
5  
6

- 7  
8 • **Population demographics:** proportion of male/female/other participants, mean age/age  
9 distribution/age-related inclusion criteria, race/ethnicity distribution, employment status  
10 distribution, primary residence data (i.e., community, retirement home, long-term care  
11 facility), marital status data, accommodation status distribution (i.e., shared or alone),  
12 population data regarding mental health comorbidities (e.g., anxiety, depression, insomnia,  
13 schizophrenia) and physical health comorbidities (e.g., chronic pain, diabetes, cancer), data  
14 regarding co-use of other substances (yes/no, specify substances)  
15  
16
- 17 • **Type of cannabis consumption:** medical/non-medical/mixed, type of cannabis products  
18 consumed (e.g., whole plant/natural, synthetic, and names of strains/synthetic compounds  
19 evaluated), mode of consumption (e.g., smoking, vaporizing, edibles, oils), ratio of  
20 THC:CBD, concentration, dose.  
21  
22
- 23 • **Comparison evaluated:** no comparison (i.e., use-only single-arm studies) or comparisons  
24 of *cannabis descriptors* (e.g., use vs no use, frequencies of use, strain types, THC or CBD  
25 concentrations, THC:CBD ratios, modes of consumption) or *participant descriptors* (e.g.,  
26 sexes/genders, age groups, races/ethnicities, employment statuses, primary residences (i.e.,  
27 community, retirement home, long-term care facility), marital statuses, accommodation  
28 statuses (i.e., shared or alone), mental health comorbidities, physical health comorbidities,  
29 co-uses of other substances).  
30  
31
- 32 • **Outcomes:** For each outcome of interest reported (see eligibility criteria), the outcome  
33 definition, duration of follow-up, direction of effect, and significance will be charted.  
34  
35  
36  
37  
38  
39  
40  
41  
42  
43  
44  
45  
46  
47  
48  
49  
50  
51  
52  
53  
54  
55  
56  
57  
58  
59  
60

1  
2  
3 Given this is a scoping review, all outcomes of interest will have equal priority. For  
4 systematic reviews, the authors' synthesized findings will be charted.  
5  
6

- 7 • Key findings identified by authors that are related to our review objectives.  
8  
9

### 10 11 **Critical appraisal of included evidence sources**

12 Quality appraisal of included systematic reviews will be conducted using the AMSTAR-2 tool  
13 [36] to identify evidence from high-quality reviews during synthesis. In keeping with scoping  
14 review methodology [27,37], formal assessment of the risk of bias in primary studies will not be  
15 undertaken.  
16  
17  
18  
19  
20  
21

### 22 23 **Synthesis and presentation of the results**

24 Mapping of the included evidence will be conducted in Microsoft Excel® (Microsoft Corporation,  
25 Seattle, Washington, USA), SmartDraw® (SmartDraw Software, LLC, San Diego, USA) and other  
26 software as needed, with results being presented using a combination of tabular, graphical, and  
27 narrative approaches. When presenting tabular data, we will group studies based upon underlying  
28 characteristics of interest, depending on the available data. These characteristics may include study  
29 design, analysis type, type of cannabis use (medical vs non-medical), or outcome type reported  
30 (i.e., mental health/behavioural, physical health, brain, and pharmacokinetic). Separate tables will  
31 be generated for each study design reviewed (e.g., systematic reviews, RCTs, NRSs and  
32 observational studies). Organizing data by outcome in tables may allow identification of  
33 comparisons across study design type, while also informing identification of contradictory results,  
34 if present. Visualization of results will be aided by using coloured table cells to indicate presence  
35 of subgroups. Similarly, outcome data will be presented with cell colour indicating direction of  
36 effect (e.g., studies with positive findings for an outcome would receive a green cell, negative  
37 findings a red cell, and non-significant findings a grey cell). Sample tables have been provided in  
38  
39  
40  
41  
42  
43  
44  
45  
46  
47  
48  
49  
50  
51  
52  
53  
54  
55  
56  
57



1  
2  
3 **Appendix 3.** Bar graphs, pie charts, geographic maps, bubble plots and other approaches will also  
4  
5 be used to present trends of the evidence base in terms of characteristics such as year of publication,  
6  
7 country of study, patient demographic traits (e.g., sex/gender, comorbidities). To augment tabular  
8  
9 and graphical presentations, we will also provide structured descriptive summaries of study  
10  
11 characteristics and outcomes to elaborate upon the evidence base and to identify topics associated  
12  
13 with considerable information versus a current lack of primary research. Final reporting of the  
14  
15 scoping review will follow the PRISMA extension for scoping reviews (PRISMA-ScR) [38].  
16  
17  
18  
19

### 20 **Dissemination and Ethics**

21  
22 Scoping reviews involve the performance of reviewing and collecting data from publicly available  
23  
24 information, and thus this research does not require ethics approval. Strategies for dissemination  
25  
26 will include a peer reviewed publication, conference presentations and engagement with  
27  
28 knowledge users as outlined in the Discussion section below.  
29  
30  
31  
32  
33

### 34 **Patient and Public Involvement**

35  
36 In planning this research, input was sought from patient organizations regarding elements of its  
37  
38 design. Representatives from these organizations will also be part of a planned stakeholder meeting  
39  
40 further described below that will inform prioritization of future research.  
41  
42  
43  
44

## 45 **DISCUSSION**

### 46 **Knowledge translation strategies**

47  
48 Our review will use an integrated knowledge translation approach via the inclusion of our  
49  
50 knowledge users (including representation from the Canadian Society of Addiction Medicine, the  
51  
52 Canadian Coalition for Seniors' Mental Health, the National Initiative for the Care for the Elderly,  
53  
54  
55  
56  
57

1  
2  
3 the Seniors Health Knowledge Network, the Community Addictions Peer Support Association,  
4 Public Health Ontario and Ottawa Public Health) as collaborators throughout the review process.  
5  
6 Input on review questions and scope was sought in the design of this protocol to ensure that our  
7  
8 work would inform current practice and policy needs. We will continue to consult with our  
9  
10 knowledge user collaborators throughout the process of the review on questions of clinical and  
11  
12 methodological importance. Manuscripts resulting from the review will be published in open-  
13  
14 access journals chosen by the research team. Lay summaries and knowledge mobilization products  
15  
16 for people with lived experience, the community, and decision makers will be developed for  
17  
18 dissemination on our knowledge users' websites.  
19  
20  
21  
22  
23

### 24 25 **Implications**

26 The findings from this review will form the foundation for a prioritization exercise with our  
27  
28 knowledge users. Shortly after sharing our findings, we will present and discuss them with our  
29  
30 knowledge users in a structured webinar. This will be followed by a survey of our knowledge users  
31  
32 to establish their perspectives on future research priorities. Finally, an online Delphi process will  
33  
34 further establish research priorities, as well as the appropriateness of designs for future research  
35  
36 (i.e., the conduct of de novo primary research to address knowledge gaps vs the performance of  
37  
38 full systematic reviews to synthesize evidence, where it already exists).  
39  
40  
41  
42  
43

### 44 **Potential limitations and mitigation strategies**

45 This scoping review addresses a very broad topic and a considerable volume of information is  
46  
47 anticipated to be retrieved by our search strategy. Using an unrestricted search strategy would  
48  
49 result in a retrieved volume of records that would be unmanageable with current software (i.e.,  
50  
51 >120,000 references). We will mitigate this challenge in three ways: (1) imposing certain  
52  
53 restrictions on the search strategy to reduce to volume of evidence, (2) using AI to aid in screening  
54  
55  
56  
57  
58  
59  
60

1  
2  
3 a large volume of references, and (3) stratifying our approach to screening and data charting  
4  
5 according to study design, focusing initial intensive efforts on higher levels of evidence [39].  
6  
7

8  
9 Given the expected volume and heterogeneity of the charted evidence, we anticipate potential  
10  
11 challenges in determining the most appropriate and useable method of reporting. We will maintain  
12  
13 flexibility in the derivation of static tabular and graphical reporting methods, while communicating  
14  
15 with our knowledge users regarding their needs. Provision of dynamic data options (i.e., Excel  
16  
17 spreadsheets) will also be considered to allow greater usability of the data.  
18  
19  
20

## 21 **Conclusions**

22  
23 Recent legalization of cannabis in several jurisdictions worldwide has made a collation of the  
24  
25 available evidence regarding the beneficial and harmful impacts of cannabis use on health  
26  
27 imperative. Older adults are a population demonstrating increased levels of cannabis use; however,  
28  
29 the natural aging process may put older adults at risk of adverse health effects from cannabis that  
30  
31 may outweigh any benefits realized. The proposed scoping review will map the evidence base  
32  
33 specific to older adults to inform decisions related to clinical care, policy, and future research  
34  
35 directions.  
36  
37  
38  
39  
40  
41  
42  
43  
44  
45  
46  
47  
48  
49  
50  
51  
52  
53  
54  
55  
56  
57  
58  
59  
60

## **FUNDING SOURCE**

This work was funded as a Catalyst Grant in 2019 by the Canadian Institutes of Health Research (CIHR) and the Canadian Centre for Substance Use and Addiction. The funders had no role in the development of the protocol.

## **ACKNOWLEDGEMENTS**

We thank Hanan Abramovici for his helpful comments and contributions to the development and review of this protocol.

## **CONTRIBUTIONS**

BH, KC and DW designed the review. DW prepared the first draft of the manuscript. BS created and tested the search strategies to be used in the bibliographic databases. KC, DR, MW and AS provided clinical expertise, and BH and CG provided review expertise during protocol development. All authors reviewed, provided comment, and approved the protocol and manuscript. BH conceived of and is the guarantor of the review.

## REFERENCES

- [1] Rotermann M, Pagé M-M. Prevalence and correlates of non-medical only compared to self-defined medical and non-medical cannabis use, Canada, 2015. *Health Rep* 2018;29:3–13.
- [2] Hall W, Lynskey M. Evaluating the public health impacts of legalizing recreational cannabis use in the United States: Impacts of legalizing recreational cannabis use. *Addiction* 2016;111:1764–73. doi:10.1111/add.13428.
- [3] Hajizadeh M. Legalizing and Regulating Marijuana in Canada: Review of Potential Economic, Social, and Health Impacts. *Int J Health Policy Manag* 2016;5:453–6. doi:10.15171/ijhpm.2016.63.
- [4] Statistics Canada. National Cannabis Survey, first quarter 2019. Government of Canada; 2019.
- [5] Choi NG, DiNitto DM, Marti CN. Older marijuana users: Life stressors and perceived social support. *Drug Alcohol Depend* 2016;169:56–63. doi:10.1016/j.drugalcdep.2016.10.012.
- [6] Pacher P. The Endocannabinoid System as an Emerging Target of Pharmacotherapy. *Pharmacol Rev* 2006;58:389–462. doi:10.1124/pr.58.3.2.
- [7] Spindle TR, Bonn-Miller MO, Vandrey R. Changing landscape of cannabis: novel products, formulations, and methods of administration. *Curr Opin Psychol* 2019;30:98–102. doi:10.1016/j.copsyc.2019.04.002.
- [8] Le Boisselier R, Alexandre J, Lelong-Boulouard V, Debruyne D. Focus on cannabinoids and synthetic cannabinoids. *Clin Pharmacol Ther* 2017;101:220–9. doi:10.1002/cpt.563.
- [9] Health Canada, Santé Canada. Information for health care professionals: cannabis (marihuana, marijuana) and the cannabinoids : dried or fresh plant and oil administration by ingestion or other means psychoactive agent. 2018.
- [10] DiNitto DM, Choi NG. Marijuana use among older adults in the U.S.A.: user characteristics, patterns of use, and implications for intervention. *Int Psychogeriatr* 2011;23:732–41. doi:10.1017/S1041610210002176.
- [11] Flint AJ, Merali Z, Vaccarino FJ. Improving Quality of Life: Substance Use and Aging. 2018.
- [12] Kaag AM, Schulte MHJ, Jansen JM, van Wingen G, Homberg J, van den Brink W, et al. The relation between gray matter volume and the use of alcohol, tobacco, cocaine and cannabis in male polysubstance users. *Drug Alcohol Depend* 2018;187:186–94. doi:10.1016/j.drugalcdep.2018.03.010.
- [13] Rotermann M, Sanmartin C, Hennessy D, Arthur M. Prescription medication use by Canadians aged 6 to 79. *Health Rep* 2014;25:9.
- [14] Yamreudeewong W, Wong HK, Brausch LM, Pulley KR. Probable interaction between warfarin and marijuana smoking. *Ann Pharmacother* 2009;43:1347–53. doi:10.1345/aph.1M064.
- [15] McLeod AL, McKenna CJ, Northridge DB. Myocardial infarction following the combined recreational use of Viagra and cannabis. *Clin Cardiol* 2002;25:133–4. doi:10.1002/clc.4960250310.
- [16] Wilens TE, Biederman J, Spencer TJ. Case study: adverse effects of smoking marijuana while receiving tricyclic antidepressants. *J Am Acad Child Adolesc Psychiatry* 1997;36:45–8. doi:10.1097/00004583-199701000-00016.
- [17] Kosel BW, Aweeka FT, Benowitz NL, Shade SB, Hilton JF, Lizak PS, et al. The effects of cannabinoids on the pharmacokinetics of indinavir and nelfinavir. *AIDS Lond Engl* 2002;16:543–50.

- 1  
2  
3  
4 [18] Mangoni AA, Jackson SHD. Age-related changes in pharmacokinetics and  
5 pharmacodynamics: basic principles and practical applications: Age-related changes in  
6 pharmacokinetics and pharmacodynamics. *Br J Clin Pharmacol* 2003;57:6–14.  
7 doi:10.1046/j.1365-2125.2003.02007.x.
- 8 [19] Aviram J, Samuelli-Leichtag G. Efficacy of Cannabis-Based Medicines for Pain  
9 Management: A Systematic Review and Meta-Analysis of Randomized Controlled Trials. *Pain*  
10 *Physician* 2017;20:E755–96.
- 11 [20] Lim K, See YM, Lee J. A Systematic Review of the Effectiveness of Medical Cannabis for  
12 Psychiatric, Movement and Neurodegenerative Disorders. *Clin Psychopharmacol Neurosci*  
13 *Off Sci J Korean Coll Neuropsychopharmacol* 2017;15:301–12.  
14 doi:10.9758/cpn.2017.15.4.301.
- 15 [21] Jouanjus E, Raymond V, Lapeyre-Mestre M, Wolff V. What is the Current Knowledge  
16 About the Cardiovascular Risk for Users of Cannabis-Based Products? A Systematic Review.  
17 *Curr Atheroscler Rep* 2017;19:26. doi:10.1007/s11883-017-0663-0.
- 18 [22] Nugent SM, Morasco BJ, O’Neil ME, Freeman M, Low A, Kondo K, et al. The Effects of  
19 Cannabis Among Adults With Chronic Pain and an Overview of General Harms: A Systematic  
20 Review. *Ann Intern Med* 2017;167:319–31. doi:10.7326/M17-0155.
- 21 [23] National Academies of Sciences, Engineering, and Medicine. The Health Effects of  
22 Cannabis and Cannabinoids: The Current State of Evidence and Recommendations for  
23 Research. Washington, DC: The National Academies Press; 2017.
- 24 [24] Pratt M, Stevens A, Thuku M, Butler C, Skidmore B, Wieland LS, et al. Benefits and harms  
25 of medical cannabis: a scoping review of systematic reviews. *Syst Rev* 2019;Submitted.
- 26 [25] van den Elsen G a. H, Ahmed AIA, Lammers M, Kramers C, Verkes RJ, van der Marck  
27 MA, et al. Efficacy and safety of medical cannabinoids in older subjects: a systematic review.  
28 *Ageing Res Rev* 2014;14:56–64. doi:10.1016/j.arr.2014.01.007.
- 29 [26] Arksey H, O’Malley L. Scoping studies: towards a methodological framework. *Int J Soc*  
30 *Res Methodol* 2005;8:19–32. doi:10.1080/1364557032000119616.
- 31 [27] Peters, MDJ, Godfrey, C, McInerney, P, Baldini Soares, C, Khalil, H, Parker D. Chapter  
32 11: Scoping Reviews. In: Aromataris E, Munn Z (Editors). *Joanna Briggs Institute Reviewer’s*  
33 *Manual*. 2017. <https://reviewersmanual.joannabriggs.org/> (accessed October 5, 2018).
- 34 [28] Levac D, Colquhoun H, O’Brien KK. Scoping studies: advancing the methodology.  
35 *Implement Sci* 2010;5:69. doi:10.1186/1748-5908-5-69.
- 36 [29] Peters MDJ, Godfrey CM, Khalil H, McInerney P, Parker D, Soares CB. Guidance for  
37 conducting systematic scoping reviews. *Int J Evid Based Healthc* 2015;13:141–6.  
38 doi:10.1097/XEB.000000000000050.
- 39 [30] Thomas A, Lubarsky S, Durning SJ, Young ME. Knowledge Syntheses in Medical  
40 Education: Demystifying Scoping Reviews. *Acad Med J Assoc Am Med Coll* 2017;92:161–  
41 6. doi:10.1097/ACM.0000000000001452.
- 42 [31] Mücke M, Weier M, Carter C, Copeland J, Degenhardt L, Cuhls H, et al. Systematic review  
43 and meta-analysis of cannabinoids in palliative medicine: Cannabinoids in palliative medicine.  
44 *J Cachexia Sarcopenia Muscle* 2018;9:220–34. doi:10.1002/jcsm.12273.
- 45 [32] Morales P, Reggio PH, Jagerovic N. An Overview on Medicinal Chemistry of Synthetic  
46 and Natural Derivatives of Cannabidiol. *Front Pharmacol* 2017;8.  
47 doi:10.3389/fphar.2017.00422.
- 48  
49  
50  
51  
52  
53  
54  
55  
56  
57  
58  
59  
60

- 1  
2  
3 [33] McGowan J, Sampson M, Salzwedel DM, Cogo E, Foerster V, Lefebvre C. PRESS Peer  
4 Review of Electronic Search Strategies: 2015 Guideline Statement. *J Clin Epidemiol*  
5 2016;75:40–6. doi:10.1016/j.jclinepi.2016.01.021.  
6  
7 [34] O’Blenis P. One Simple Way To Speed Up Your Screening Process 2017.  
8 <https://blog.evidencepartners.com/one-simple-way-to-speed-up-your-screening-process>  
9 (accessed May 21, 2019).  
10 [35] Higgins JPT, Green S, editors. *Cochrane Handbook for Systematic Reviews of*  
11 *Interventions Version 5.1.0 [updated March 2011]* 2011.  
12 [36] Shea BJ, Reeves BC, Wells G, Thuku M, Hamel C, Moran J, et al. AMSTAR 2: a critical  
13 appraisal tool for systematic reviews that include randomised or non-randomised studies of  
14 healthcare interventions, or both. *BMJ* 2017;358:j4008.  
15  
16 [37] Arksey H, O’Malley L. Scoping studies: towards a methodological framework. *Int J Soc*  
17 *Res Methodol* 2005;8:19–32. doi:10.1080/1364557032000119616.  
18 [38] Tricco AC, Lillie E, Zarin W, O’Brien KK, Colquhoun H, Levac D, et al. PRISMA  
19 Extension for Scoping Reviews (PRISMA-ScR): Checklist and Explanation. *Ann Intern Med*  
20 2018. doi:10.7326/M18-0850.  
21  
22 [39] Oxford Centre for Evidence-based Medicine. Levels of Evidence 2009.  
23 [https://www.cebm.net/2009/06/oxford-centre-evidence-based-medicine-levels-evidence-](https://www.cebm.net/2009/06/oxford-centre-evidence-based-medicine-levels-evidence-march-2009/)  
24 [march-2009/](https://www.cebm.net/2009/06/oxford-centre-evidence-based-medicine-levels-evidence-march-2009/) (accessed May 21, 2019).  
25  
26  
27  
28  
29  
30  
31  
32  
33  
34  
35  
36  
37  
38  
39  
40  
41  
42  
43  
44  
45  
46  
47  
48  
49  
50  
51  
52  
53  
54  
55  
56  
57  
58  
59  
60

1  
2  
3  
4 **APPENDICES TO:**  
5

6 The effects of medical and non-medical cannabis use in older adults: protocol for a scoping review.  
7 Wolfe DM et al.

- 8 • Appendix 1: PRISMA-P Checklist
- 9 • Appendix 2: Search Strategy
- 10 • Appendix 3: Sample tables for presentation of findings
- 11
- 12
- 13
- 14
- 15
- 16
- 17
- 18
- 19
- 20
- 21
- 22
- 23
- 24
- 25
- 26
- 27
- 28
- 29
- 30
- 31
- 32
- 33
- 34
- 35
- 36
- 37
- 38
- 39
- 40
- 41
- 42
- 43
- 44
- 45
- 46
- 47
- 48
- 49
- 50
- 51
- 52
- 53
- 54
- 55
- 56
- 57
- 58
- 59
- 60



## **Appendix 1. PRISMA-P Checklist**

**PRISMA-P (Preferred Reporting Items for Systematic review and Meta-Analysis Protocols) 2015 checklist: recommended items to address in a systematic review protocol\***

| <b>Section and topic</b>          | <b>Item No</b> | <b>Checklist item</b>                                                                                                                                                                           | <b>Page #</b> |
|-----------------------------------|----------------|-------------------------------------------------------------------------------------------------------------------------------------------------------------------------------------------------|---------------|
| <b>ADMINISTRATIVE INFORMATION</b> |                |                                                                                                                                                                                                 |               |
| Title:                            |                |                                                                                                                                                                                                 |               |
| Identification                    | 1a             | Identify the report as a protocol of a systematic review                                                                                                                                        | 1             |
| Update                            | 1b             | If the protocol is for an update of a previous systematic review, identify as such                                                                                                              |               |
| Registration                      | 2              | If registered, provide the name of the registry (such as PROSPERO) and registration number                                                                                                      | NA            |
| Authors:                          |                |                                                                                                                                                                                                 |               |
| Contact                           | 3a             | Provide name, institutional affiliation, e-mail address of all protocol authors; provide physical mailing address of corresponding author                                                       | 1             |
| Contributions                     | 3b             | Describe contributions of protocol authors and identify the guarantor of the review                                                                                                             | 23            |
| Amendments                        | 4              | If the protocol represents an amendment of a previously completed or published protocol, identify as such and list changes; otherwise, state plan for documenting important protocol amendments | 8             |
| Support:                          |                |                                                                                                                                                                                                 |               |
| Sources                           | 5a             | Indicate sources of financial or other support for the review                                                                                                                                   | 23            |
| Sponsor                           | 5b             | Provide name for the review funder and/or sponsor                                                                                                                                               | 23            |
| Role of sponsor or funder         | 5c             | Describe roles of funder(s), sponsor(s), and/or institution(s), if any, in developing the protocol                                                                                              | 23            |
| <b>INTRODUCTION</b>               |                |                                                                                                                                                                                                 |               |
| Rationale                         | 6              | Describe the rationale for the review in the context of what is already known                                                                                                                   | 4–7           |
| Objectives                        | 7              | Provide an explicit statement of the question(s) the review will address with reference to participants, interventions, comparators, and outcomes (PICO)                                        | 7             |
| <b>METHODS</b>                    |                |                                                                                                                                                                                                 |               |

|                                    |     |                                                                                                                                                                                                                                                  |              |
|------------------------------------|-----|--------------------------------------------------------------------------------------------------------------------------------------------------------------------------------------------------------------------------------------------------|--------------|
| Eligibility criteria               | 8   | Specify the study characteristics (such as PICO, study design, setting, time frame) and report characteristics (such as years considered, language, publication status) to be used as criteria for eligibility for the review                    | 8–12         |
| Information sources                | 9   | Describe all intended information sources (such as electronic databases, contact with study authors, trial registers or other grey literature sources) with planned dates of coverage                                                            | 12–13        |
| Search strategy                    | 10  | Present draft of search strategy to be used for at least one electronic database, including planned limits, such that it could be repeated                                                                                                       | 29–39        |
| Study records:                     |     |                                                                                                                                                                                                                                                  |              |
| Data management                    | 11a | Describe the mechanism(s) that will be used to manage records and data throughout the review                                                                                                                                                     | 14           |
| Selection process                  | 11b | State the process that will be used for selecting studies (such as two independent reviewers) through each phase of the review (that is, screening, eligibility and inclusion in meta-analysis)                                                  | 13–17        |
| Data collection process            | 11c | Describe planned method of extracting data from reports (such as piloting forms, done independently, in duplicate), any processes for obtaining and confirming data from investigators                                                           | 18           |
| Data items                         | 12  | List and define all variables for which data will be sought (such as PICO items, funding sources), any pre-planned data assumptions and simplifications                                                                                          | 18–20        |
| Outcomes and prioritization        | 13  | List and define all outcomes for which data will be sought, including prioritization of main and additional outcomes, with rationale                                                                                                             | 10–11, 19–20 |
| Risk of bias in individual studies | 14  | Describe anticipated methods for assessing risk of bias of individual studies, including whether this will be done at the outcome or study level, or both; state how this information will be used in data synthesis                             | 20           |
| Data synthesis                     | 15a | Describe criteria under which study data will be quantitatively synthesised                                                                                                                                                                      | NA           |
|                                    | 15b | If data are appropriate for quantitative synthesis, describe planned summary measures, methods of handling data and methods of combining data from studies, including any planned exploration of consistency (such as $I^2$ , Kendall's $\tau$ ) | NA           |
|                                    | 15c | Describe any proposed additional analyses (such as sensitivity or subgroup analyses, meta-regression)                                                                                                                                            | NA           |
|                                    | 15d | If quantitative synthesis is not appropriate, describe the type of summary planned                                                                                                                                                               | 20–21, 40–45 |
| Meta-bias(es)                      | 16  | Specify any planned assessment of meta-bias(es) (such as publication bias across studies, selective reporting within studies)                                                                                                                    | NA           |
| Confidence in cumulative evidence  | 17  | Describe how the strength of the body of evidence will be assessed (such as GRADE)                                                                                                                                                               | NA           |

**\* It is strongly recommended that this checklist be read in conjunction with the PRISMA-P Explanation and Elaboration (cite when available) for important clarification on the items. Amendments to a review protocol should be tracked and dated. The copyright for PRISMA-P (including checklist) is held by the PRISMA-P Group and is distributed under a Creative Commons Attribution Licence 4.0.**

1  
2  
3  
4  
5  
6  
7  
8  
9  
10  
11  
12  
13  
14  
15  
16  
17  
18  
19  
20  
21  
22  
23  
24  
25  
26  
27  
28  
29  
30  
31  
32  
33  
34  
35  
36  
37  
38  
39  
40  
41  
42  
43  
44  
45  
46  
47

*From: Shamseer L, Moher D, Clarke M, Gherzi D, Liberati A, Petticrew M, Shekelle P, Stewart L, PRISMA-P Group. Preferred reporting items for systematic review and meta-analysis protocols (PRISMA-P) 2015: elaboration and explanation. BMJ. 2015 Jan 2;349(jan02 1):g7647.*

For peer review only

## **Appendix 2. Search Strategy**

Cannabis

Final Strategy

Ovid Multifile

Database: Embase Classic+Embase <1947 to 2019 June 11>, Ovid MEDLINE(R) ALL <1946 to June 11, 2019>, PsycINFO <1806 to June Week 1 2019>

Search Strategy:

-----

- 1 Cannabis/ (47483)
- 2 exp Cannabinoids/ (82151)
- 3 Marijuana Abuse/ (10406)
- 4 exp "Marijuana Use"/ (14185)
- 5 Marijuana Smoking/ (7532)
- 6 ("c.indica" or "c.sativa" or cannabi\* or bhang or cannador or cbd or charas or eucannabinolide\* or ganja or ganjah or hash or hashish or hemp or marihuana\* or marijuana\*).tw,kf. (136291)
- 7 (epidiolex or gwp 42003p or gwp42003p or nabidiolex).tw,kf. (165)
- 8 (dronabinol or thc or tetrahydrocannabinol\* or ea 1477 or ea1477 or marinol or qcd 84924 or syndros or tetrabinex or tetranabinex).tw,kf. (24947)
- 9 (cesamet or nabilone).tw,kf. (979)
- 10 (deltanyne or "abbott 40566" or namisol or dronabinolum or "QCD 84924" or "CCRIS 4726").tw,kf. (27)
- 11 (nabiximol? or "gw 1000" or gw1000 or "sab 378" or sab378 or sativex).tw,kf. (1051)
- 12 (13956-29-1 or 19GBJ60SN5 or UNII-19GBJ60SN5 or ZYN002).rn,nm. (4791)
- 13 or/1-12 [CANNABIS] (170422)
- 14 exp Animals/ not (exp Animals/ and Humans/) (18640406)
- 15 13 not 14 [ANIMAL-ONLY REMOVED] (107451)
- 16 (comment or editorial or news or newspaper article).pt. (1925110)
- 17 (letter not (letter and randomized controlled trial)).pt. (2094822)
- 18 (case reports not (meta analysis or systematic review or controlled clinical trial or randomized controlled trial or pragmatic clinical trial or comparative study or observational study)).pt. (2003526)
- 19 (case report\* or case study or case studies).ti. not (meta analysis or systematic review or controlled clinical trial or randomized controlled trial or pragmatic clinical trial or comparative study or observational study).pt. (663973)
- 20 15 not (16 or 17 or 18 or 19) [OPINION PIECES AND CASE REPORTS REMOVED] (100750)
- 21 limit 20 to yr="2000-current" (73251)
- 22 limit 21 to systematic reviews [Limit not valid in Embase; records were retained] (27329)
- 23 meta analysis.pt. (101732)
- 24 exp meta-analysis as topic/ (57757)
- 25 (meta-analy\* or metanaly\* or metaanaly\* or met analy\* or integrative research or integrative review\* or integrative overview\* or research integration or research overview\* or collaborative review\*).tw,kf. (390079)
- 26 systematic review.pt. (107850)
- 27 (systematic review\* or systematic overview\* or evidence-based review\* or evidence-based overview\* or (evidence adj3 (review\* or overview\*)) or meta-review\* or meta-overview\* or meta-synthes\* or "review of reviews" or technology assessment\* or HTA or HTAs).tw,kf. (463074)
- 28 exp Technology assessment, biomedical/ (24267)
- 29 (cochrane or health technology assessment or evidence report).jw. (38382)
- 30 (network adj (MA or MAs)).tw,kf. (22)

1  
 2  
 3 31 (NMA or NMAs).tw,kf. (4839)  
 4 32 indirect\* compar\*.tw,kf. (5074)  
 5 33 (indirect treatment\* adj1 compar\*).tw,kf. (743)  
 6 34 (mixed treatment\* adj1 compar\*).tw,kf. (1323)  
 7 35 (multiple treatment\* adj1 compar\*).tw,kf. (373)  
 8 36 (multi-treatment\* adj1 compar\*).tw,kf. (5)  
 9 37 simultaneous\* compar\*.tw,kf. (2469)  
 10 38 mixed comparison?.tw,kf. (69)  
 11 39 or/23-38 (799947)  
 12 40 21 and 39 (1997)  
 13 41 22 or 40 [SRs/MAs] (27931)  
 14 42 (controlled clinical trial or randomized controlled trial or pragmatic clinical trial).pt. (572176)  
 15 43 clinical trials as topic.sh. (187251)  
 16 44 exp Randomized Controlled Trials as Topic/ (288357)  
 17 45 (randomi#ed or randomly or RCT or placebo\*).tw,kf. (2334678)  
 18 46 ((singl\* or doubl\* or trebl\* or tripl\*) adj (mask\* or blind\* or dumm\*)).tw,kf. (420279)  
 19 47 trial.ti. (507909)  
 20 48 or/42-47 (2953906)  
 21 49 21 and 48 [RCTS] (5693)  
 22 50 controlled clinical trial.pt. (93106)  
 23 51 Controlled Clinical Trial/ or Controlled Clinical Trials as Topic/ (570170)  
 24 52 (control\* adj2 trial\*).tw,kf. (616820)  
 25 53 Non-Randomized Controlled Trials as Topic/ (10630)  
 26 54 (nonrandom\* or non-random\* or quasi-random\* or quasi-experiment\*).tw,kf. (132402)  
 27 55 (nRCT or nRCT or non-RCT).tw,kf. (710)  
 28 56 Controlled Before-After Studies/ (214313)  
 29 57 (control\* adj3 ("before and after" or "before after")).tw,kf. (10168)  
 30 58 Interrupted Time Series Analysis/ (206520)  
 31 59 time series.tw,kf. (66339)  
 32 60 (pre- adj3 post-).tw,kf. (235905)  
 33 61 (pretest adj3 posttest).tw,kf. (18124)  
 34 62 Historically Controlled Study/ (224681)  
 35 63 (control\* adj2 stud\$3).tw,kf. (541007)  
 36 64 Control Groups/ (125963)  
 37 65 (control\* adj2 group\$1).tw,kf. (1235605)  
 38 66 trial.ti. (507909)  
 39 67 or/50-66 (3428538)  
 40 68 21 and 67 [NON-RCTS] (5249)  
 41 69 exp Cohort Studies/ (2337056)  
 42 70 cohort?.tw,kf. (1462096)  
 43 71 Retrospective Studies/ (1166307)  
 44 72 (longitudinal or prospective or retrospective).tw,kf. (3106077)  
 45 73 ((followup or follow-up) adj (study or studies)).tw,kf. (130193)  
 46 74 Observational study.pt. (62773)  
 47 75 (observation\$2 adj (study or studies)).tw,kf. (252177)  
 48 76 ((population or population-based) adj (study or studies or analys#s)).tw,kf. (40902)  
 49 77 ((multidimensional or multi-dimensional) adj (study or studies)).tw,kf. (371)  
 50 78 Comparative Study.pt. (1831731)  
 51 79 ((comparative or comparison) adj (study or studies)).tw,kf. (263134)  
 52 80 exp Case-Control Studies/ (1156584)  
 53 81 ((case-control\* or case-based or case-comparison) adj (study or studies)).tw,kf. (233233)

- 1  
2  
3 82 Cross-Sectional Studies/ (470673)  
4 83 (cross-section\* or crosssection\*).tw,kf. (872615)  
5 84 or/69-83 (8133205)  
6 85 21 and 84 [OBSERVATIONAL STUDIES] (16552)  
7 86 Qualitative Research/ (119259)  
8 87 Interview/ (220812)  
9 88 interview\*.mp. (1208372)  
10 89 (theme\* or thematic).mp. (343144)  
11 90 qualitative.af. (889955)  
12 91 Nursing Methodology Research/ (30884)  
13 92 questionnaire\*.mp. (1946523)  
14 93 ethnological research.mp. (29)  
15 94 ethnograph\*.mp. (49253)  
16 95 ethnonursing.af. (363)  
17 96 phenomenol\*.af. (165043)  
18 97 (grounded adj (theor\* or study or studies or research or analys#s)).af. (78144)  
19 98 (life stor\* or women\* stor\*).mp. (6740)  
20 99 (emic or etic or hermeneutic\* or heuristic\* or semiotic\*).af. or (data adj1 saturat\*).tw. or participant  
21 observ\*.tw. (141504)  
22 100 (social construct\* or (postmodern\* or post-structural\*) or (post structural\* or poststructural\*) or  
23 post modern\* or post-modern\* or feminis\* or interpret\*).mp. (1234463)  
24 101 (action research or cooperative inquir\* or co operative inquir\* or co-operative inquir\*).mp.  
25 (17587)  
26 102 (humanistic or existential or experiential or paradigm\*).mp. (453321)  
27 103 (field adj (study or studies or research)).tw. (43603)  
28 104 human science.tw. (1161)  
29 105 biographical method.tw. (103)  
30 106 theoretical sampl\*.af. (2386)  
31 107 ((purpos\* adj4 sampl\*) or (focus adj group\*)).af. (187736)  
32 108 (account or accounts or unstructured or open-ended or open ended or text\* or narrative\*).mp.  
33 (1691731)  
34 109 (life world or life-world or conversation analys#s or personal experience\* or theoretical  
35 saturation).mp. (83460)  
36 110 ((lived or life) adj experience\*).mp. (67584)  
37 111 observational method\*.af. (4965)  
38 112 content analys#s.af. (111618)  
39 113 (constant adj (comparative or comparison)).af. (14795)  
40 114 ((discourse\* or discurs\*) adj3 analys#s).tw. (13049)  
41 115 narrative analys#s.af. (9134)  
42 116 (heidegger\* or colaizzi\* or spiegelberg\* or van manen\* or van kaam\* or merleau ponty\* or  
43 husserl\* or foucault\* or (corbin adj2 strauss\*) or glaser\*).tw. (17480)  
44 117 mixed method\*.tw,kf. (59378)  
45 118 or/86-117 (6729977)  
46 119 21 and 118 [QUALITATIVE STUDIES] (18936)  
47 120 41 or 49 or 68 or 85 or 119 [ALL STUDY DESIGNS] (51581)  
48 121 120 use medall [MEDLINE RECORDS] (15274)  
49 122 cannabis/ (47483)  
50 123 exp cannabinoid/ (69089)  
51 124 cannabis addiction/ (9169)  
52 125 exp "cannabis use"/ (9827)  
53 126 cannabis addiction/ (9169)  
54  
55  
56  
57  
58  
59

1  
2  
3 127 cannabis sativa/ (8702)  
4 128 ("c.indica" or "c.sativa" or cannabi\* or bhang or cannador or cbd or charas or eucannabinolide\* or  
5 ganja or ganjah or hash or hashish or hemp or marihuana\* or marijuana\*).tw,kw. (137411)  
6 129 (epidiolex or gwp 42003p or gwp42003p or nabidiolex).tw,kw. (165)  
7 130 (dronabinol or thc or tetrahydrocannabinol\* or ea 1477 or ea1477 or marinol or qcd 84924 or  
8 syndros or tetrabinex or tetranabinex).tw,kw. (25260)  
9 131 (cesamet or nabilone).tw,kw. (993)  
10 132 (deltanyne or "abbott 40566" or namisol or dronabinolum or "QCD 84924" or "CCRIS  
11 4726").tw,kw. (27)  
12 133 (nabiximol? or "gw 1000" or gw1000 or "sab 378" or sab378 or sativex).tw,kw. (1065)  
13 134 (13956-29-1 or 19GBJ60SN5 or UNII-19GBJ60SN5 or ZYN002).rn. (4791)  
14 135 or/122-134 [CANNABIS] (170167)  
15 136 exp animal/ or exp animal experimentation/ or exp animal model/ or exp animal experiment/ or  
16 nonhuman/ or exp vertebrate/ (50765399)  
17 137 exp human/ or exp human experimentation/ or exp human experiment/ (38848166)  
18 138 136 not 137 (11918927)  
19 139 135 not 138 [ANIMAL-ONLY REMOVED] (137727)  
20 140 editorial.pt. (1097387)  
21 141 letter.pt. not (letter.pt. and randomized controlled trial/) (2089753)  
22 142 (case report\* or case study or case studies).ti. not (meta-analysis/ or "systematic review"/ or  
23 randomized controlled trial/ or controlled clinical trial/ or controlled study/ or time series analysis/ or  
24 cohort analysis/ or retrospective study/ or longitudinal study/ or prospective study/ or exp comparative  
25 study/ or observational study/ or exp case control study/ or cross-sectional study/) (647181)  
26 143 conference abstract.pt. (3430116)  
27 144 139 not (140 or 141 or 142 or 143) [OPINION PIECES, CASE REPORTS AND CONFERENCE  
28 ABSTRACTS REMOVED] (119468)  
29 145 limit 144 to yr="2000-current" (92402)  
30 146 meta-analysis/ (270155)  
31 147 "systematic review"/ (314772)  
32 148 "meta analysis (topic)"/ (39946)  
33 149 (meta-analy\* or metanaly\* or metaanaly\* or met analy\* or integrative research or integrative  
34 review\* or integrative overview\* or research integration or research overview\* or collaborative  
35 review\*).tw,kw. (393014)  
36 150 (systematic review\* or systematic overview\* or evidence-based review\* or evidence-based  
37 overview\* or (evidence adj3 (review\* or overview\*)) or meta-review\* or meta-overview\* or meta-  
38 synthes\* or "review of reviews" or technology assessment\* or HTA or HTAs).tw,kw. (466451)  
39 151 biomedical technology assessment/ (23156)  
40 152 (cochrane or health technology assessment or evidence report).jw. (38382)  
41 153 (network adj (MA or MAs)).tw,kw. (22)  
42 154 (NMA or NMAs).tw,kw. (4857)  
43 155 indirect\* compar\*.tw,kw. (5140)  
44 156 (indirect treatment\* adj1 compar\*).tw,kw. (747)  
45 157 (mixed treatment\* adj1 compar\*).tw,kw. (1347)  
46 158 (multiple treatment\* adj1 compar\*).tw,kw. (379)  
47 159 (multi-treatment\* adj1 compar\*).tw,kw. (5)  
48 160 simultaneous\* compar\*.tw,kw. (2469)  
49 161 mixed comparison?.tw,kw. (70)  
50 162 or/146-161 (866096)  
51 163 145 and 162 [REVIEWS] (3255)  
52 164 randomized controlled trial/ or controlled clinical trial/ (1311919)  
53 165 "clinical trial (topic)"/ (101825)  
54  
55  
56  
57  
58  
59  
60

1  
2  
3 166 "randomized controlled trial (topic)"/ (161519)  
4 167 (randomi#ed or randomly or RCT or placebo\*).tw,kw. (2336720)  
5 168 ((singl\* or doubl\* or trebl\* or tripl\*) adj (mask\* or blind\* or dumm\*)).tw,kw. (420435)  
6 169 trial.ti. (507909)  
7 170 or/164-169 (3096931)  
8 171 145 and 170 [RCTS] (8046)  
9 172 controlled clinical trial/ (556323)  
10 173 "controlled clinical trial (topic)"/ (10128)  
11 174 (control\* adj2 trial\*).tw,kw. (620815)  
12 175 (nonrandom\* or non-random\* or quasi-random\* or quasi-experiment\*).tw,kw. (132629)  
13 176 (nRCT or nRCT or non-RCT).tw,kw. (711)  
14 177 (control\* adj3 ("before and after" or "before after")).tw,kw. (10173)  
15 178 time series analysis/ (23336)  
16 179 time series.tw,kw. (67114)  
17 180 pretest posttest control group design/ (388)  
18 181 (pre- adj3 post-).tw,kw. (235933)  
19 182 (pretest adj3 posttest).tw,kw. (18127)  
20 183 controlled study/ (6713848)  
21 184 (control\* adj2 stud\$3).tw,kw. (542508)  
22 185 control group/ (125963)  
23 186 (control\* adj2 group\$1).tw,kw. (1235369)  
24 187 trial.ti. (507909)  
25 188 or/172-187 (8856567)  
26 189 145 and 188 [NON-RCTS] (17004)  
27 190 cohort analysis/ (714392)  
28 191 cohort?.tw,kw. (1464380)  
29 192 retrospective study/ (1537235)  
30 193 longitudinal study/ (250984)  
31 194 prospective study/ (1031600)  
32 195 (longitudinal or prospective or retrospective).tw,kw. (3111465)  
33 196 follow up/ (1448744)  
34 197 ((followup or follow-up) adj (study or studies)).tw,kw. (132011)  
35 198 observational study/ (231986)  
36 199 (observation\$2 adj (study or studies)).tw,kw. (252792)  
37 200 population research/ (99974)  
38 201 ((population or population-based) adj (study or studies or analys#s)).tw,kw. (48926)  
39 202 ((multidimensional or multi-dimensional) adj (study or studies)).tw,kw. (372)  
40 203 exp comparative study/ (3194802)  
41 204 ((comparative or comparison) adj (study or studies)).tw,kw. (261543)  
42 205 exp case control study/ (1156584)  
43 206 ((case-control\* or case-based or case-comparison) adj (study or studies)).tw,kw. (234698)  
44 207 cross-sectional study/ (598245)  
45 208 (cross-section\* or crosssection\*).tw,kw. (874654)  
46 209 or/190-208 (10058649)  
47 210 145 and 209 [OBSERVATIONAL STUDIES] (23782)  
48 211 exp qualitative research/ (125102)  
49 212 exp interview/ (285894)  
50 213 interview\*.mp. (1208372)  
51 214 (theme\* or thematic).mp. (343144)  
52 215 qualitative.af. (889955)  
53 216 nursing methodology research/ (30884)  
54  
55  
56  
57  
58  
59  
60



- 1  
2  
3 217 questionnaire\*.mp. (1946523)  
4 218 ethnological research.mp. (29)  
5 219 ethnograph\*.mp. (49253)  
6 220 ethnosing.af. (363)  
7 221 phenomenol\*.af. (165043)  
8 222 (grounded adj (theor\* or study or studies or research or analys#s)).af. (78144)  
9 223 (life stor\* or women\* stor\*).mp. (6740)  
10 224 (emic or etic or hermeneutic\* or heuristic\* or semiotic\*).af. or (data adj1 saturat\*).tw. or  
11 participant observ\*.tw. (141504)  
12 225 (social construct\* or (postmodern\* or post-structural\*) or (post structural\* or poststructural\*) or  
13 post modern\* or post-modern\* or feminis\* or interpret\*).mp. (1234463)  
14 226 (action research or cooperative inquir\* or co operative inquir\* or co-operative inquir\*).mp.  
15 (17587)  
16 227 (humanistic or existential or experiential or paradigm\*).mp. (453321)  
17 228 (field adj (study or studies or research)).tw. (43603)  
18 229 human science.tw. (1161)  
19 230 biographical method.tw. (103)  
20 231 theoretical sampl\*.af. (2386)  
21 232 ((purpos\* adj4 sampl\* or (focus adj group\*)).af. (187736)  
22 233 (account or accounts or unstructured or open-ended or open ended or text\* or narrative\*).mp.  
23 (1691731)  
24 234 (life world or life-world or conversation analys#s or personal experience\* or theoretical  
25 saturation).mp. (83460)  
26 235 ((lived or life) adj experience\*).mp. (67584)  
27 236 observational method\*.af. (4965)  
28 237 content analys#s.af. (111618)  
29 238 (constant adj (comparative or comparison)).af. (14795)  
30 239 ((discourse\* or discours\*) adj3 analys#s).tw. (13049)  
31 240 narrative analys#s.af. (9134)  
32 241 (heidegger\* or colaizzi\* or spiegelberg\* or van manen\* or van kaam\* or merleau ponty\* or  
33 husserl\* or foucault\* or (corbin adj2 strauss\*) or glaser\*).tw. (17480)  
34 242 mixed method\*.tw,kw. (59805)  
35 243 or/211-242 (6739667)  
36 244 145 and 243 [QUALITATIVE STUDIES] (23300)  
37 245 163 or 171 or 189 or 210 or 244 [ALL STUDY DESIGNS] (50209)  
38 246 245 use emezd [EMBASE RECORDS] (25229)  
39 247 exp Cannabis/ (50168)  
40 248 exp Cannabinoids/ (82151)  
41 249 Marijuana Usage/ (2717)  
42 250 ("c.indica" or "c.sativa" or cannabi\* or bhang or cannador or cbd or charas or eucannabinolide\* or  
43 ganja or ganjah or hash or hashish or hemp or marihuana\* or marijuana\*).tw. (135754)  
44 251 (epidiox or gwp 42003p or gwp42003p or nabidiox).tw. (164)  
45 252 (dronabinol or thc or tetrahydrocannabinol\* or ea 1477 or ea1477 or marinol or qcd 84924 or  
46 syndros or tetrabinex or tetranabinex).tw. (24784)  
47 253 (cesamet or nabilone).tw. (975)  
48 254 (deltanyne or "abbott 40566" or namisol or dronabinolum or "QCD 84924" or "CCRIS 4726").tw.  
49 (26)  
50 255 (nabiximol? or "gw 1000" or gw1000 or "sab 378" or sab378 or sativex).tw. (1040)  
51 256 or/247-255 [CANNABIS] (167465)  
52 257 limit 256 to yr="2000-current" (130951)  
53  
54  
55  
56  
57  
58  
59  
60

1  
2  
3 258 limit 257 to ("0830%2509%2509systematic review" or 1200 meta analysis or 1300 metasynthesis)  
4 [Limit not valid in Embase,Ovid MEDLINE(R),Ovid MEDLINE(R) Daily Update,Ovid MEDLINE(R)  
5 In-Process,Ovid MEDLINE(R) Publisher,PsycINFO; records were retained] (111540)  
6 259 meta analysis/ (270155)  
7 260 (meta-analy\* or metanaly\* or metaanaly\* or met analy\* or integrative research or integrative  
8 review\* or integrative overview\* or research integration or research overview\* or collaborative  
9 review\*).tw. (388820)  
10 261 "systematic review"/ (314772)  
11 262 (systematic review\* or systematic overview\* or evidence-based review\* or evidence-based  
12 overview\* or (evidence adj3 (review\* or overview\*)) or meta-review\* or meta-overview\* or meta-  
13 synthes\* or "review of reviews" or technology assessment\* or HTA or HTAs).tw. (461287)  
14 263 (network adj (MA or MAs)).tw. (22)  
15 264 (NMA or NMAs).tw. (4824)  
16 265 indirect\* compar\*.tw. (5052)  
17 266 (indirect treatment\* adj1 compar\*).tw. (725)  
18 267 (mixed treatment\* adj1 compar\*).tw. (1267)  
19 268 (multiple treatment\* adj1 compar\*).tw. (360)  
20 269 (multi-treatment\* adj1 compar\*).tw. (5)  
21 270 simultaneous\* compar\*.tw. (2469)  
22 271 mixed comparison?.tw. (69)  
23 272 or/259-271 (811715)  
24 273 257 and 272 (3419)  
25 274 258 or 273 [REVIEWS] (111936)  
26 275 limit 257 to "0300 clinical trial" [Limit not valid in Embase,Ovid MEDLINE(R),Ovid  
27 MEDLINE(R) Daily Update,Ovid MEDLINE(R) In-Process,Ovid MEDLINE(R) Publisher; records were  
28 retained] (111666)  
29 276 exp clinical trials/ (307124)  
30 277 (randomi#ed or randomly or RCT or placebo\*).tw. (2332689)  
31 278 ((singl\* or doubl\* or trebl\* or tripl\*) adj (mask\* or blind\* or dumm\*)).tw. (420183)  
32 279 trial.ti. (507909)  
33 280 or/276-279 (2730358)  
34 281 257 and 280 (9191)  
35 282 275 or 281 [RCTS] (112919)  
36 283 (control\* adj2 trial\*).tw. (614352)  
37 284 (nonrandom\* or non-random\* or quasi-random\* or quasi-experiment\*).tw. (132248)  
38 285 (nRCT or nRCT or non-RCT).tw. (709)  
39 286 (control\* adj3 ("before and after" or "before after")).tw. (10162)  
40 287 time series/ (23361)  
41 288 time series.tw. (65880)  
42 289 (pre- adj3 post-).tw. (235815)  
43 290 (pretest adj3 posttest).tw. (18118)  
44 291 (control\* adj2 stud\$3).tw. (540018)  
45 292 experiment controls/ (907)  
46 293 (control\* adj2 group\$1).tw. (1235251)  
47 294 trial.ti. (507909)  
48 295 or/283-294 (2833768)  
49 296 257 and 295 [NON-RCTS] (7783)  
50 297 limit 257 to ("0430 followup study" or "0450 longitudinal study" or "0451 prospective study" or  
51 "0453 retrospective study") [Limit not valid in Embase,Ovid MEDLINE(R),Ovid MEDLINE(R) Daily  
52 Update,Ovid MEDLINE(R) In-Process,Ovid MEDLINE(R) Publisher; records were retained] (113931)  
53 298 cohort?.tw. (1460179)  
54  
55  
56  
57  
58  
59  
60

299 exp longitudinal studies/ (267415)  
 300 retrospective studies/ (1166307)  
 301 (longitudinal or prospective or retrospective).tw. (3101143)  
 302 followup studies/ (627480)  
 303 ((followup or follow-up) adj (study or studies)).tw. (128839)  
 304 exp observation methods/ (5724)  
 305 (observation\$2 adj (study or studies)).tw. (251407)  
 306 ((population or population-based) adj (study or studies or analys#s)).tw. (40364)  
 307 ((multidimensional or multi-dimensional) adj (study or studies)).tw. (371)  
 308 ((comparative or comparison) adj (study or studies)).tw. (258365)  
 309 ((case-control\* or case-based or case-comparison) adj (study or studies)).tw. (232321)  
 310 (cross-section\* or crosssection\*).tw. (871622)  
 311 or/298-310 (6229379)  
 312 257 and 311 (21156)  
 313 297 or 312 [OBSERVATIONAL STUDIES] (116189)  
 314 interview\*.mp. (1208372)  
 315 thematic analysis/ (12832)  
 316 qualitative.af. (889955)  
 317 questionnaire\*.mp. (1946523)  
 318 ethnological research.mp. (29)  
 319 ethnograph\*.mp. (49253)  
 320 ethnonsursing.af. (363)  
 321 phenomenol\*.af. (165043)  
 322 grounded theory/ (10853)  
 323 (grounded adj (theor\* or study or studies or research or analys#s)).af. (78144)  
 324 exp life experiences/ (51768)  
 325 (life stor\* or women\* stor\*).mp. (6740)  
 326 (emic or etic or hermeneutic\* or heuristic\* or semiotic\*).af. or (data adj1 saturat\*).tw. or  
 327 participant observ\*.tw. (141504)  
 328 (social construct\* or (postmodern\* or post-structural\*) or (post structural\* or poststructural\*) or  
 329 post modern\* or post-modern\* or feminis\* or interpret\*).mp. (1234463)  
 330 (action research or cooperative inquir\* or co operative inquir\* or co-operative inquir\*).mp.  
 331 (17587)  
 332 (humanistic or existential or experiential or paradigm\*).mp. (453321)  
 333 (field adj (study or studies or research)).tw. (43603)  
 334 human science.tw. (1161)  
 335 biographical method.tw. (103)  
 336 theoretical sampl\*.af. (2386)  
 337 ((purpos\* adj4 sampl\* or (focus adj group\*)).af. (187736)  
 338 (account or accounts or unstructured or open-ended or open ended or text\* or narrative\*).mp.  
 339 (1691731)  
 340 (life world or life-world or conversation analys#s or personal experience\* or theoretical  
 341 saturation).mp. (83460)  
 342 ((lived or life) adj experience\*).mp. (67584)  
 343 observational method\*.af. (4965)  
 344 content analys#s.af. (111618)  
 345 (constant adj (comparative or comparison)).af. (14795)  
 346 ((discourse\* or discours\*) adj3 analys#s).tw. (13049)  
 347 narrative analys#s.af. (9134)  
 348 (heidegger\* or colaizzi\* or spiegelberg\* or van manen\* or van kaam\* or merleau ponty\* or  
 349 husserl\* or foucault\* or (corbin adj2 strauss\*) or glaser\*).tw. (17480)

1  
2  
3 344 mixed method\*.tw. (59032)  
4 345 or/314-344 (6636676)  
5 346 257 and 345 [QUALITATIVE STUDIES] (26698)  
6 347 274 or 282 or 296 or 313 or 346 [ALL STUDY DESIGNS] (122411)  
7 348 347 use medall,emczd (111415)  
8 349 347 not 348 [PSYCINFO RECORDS] (10996)  
9 350 121 or 246 or 349 [ALL STUDY DESIGNS - ALL DATABASES] (51499)  
10 351 41 use medall [MEDLINE REVIEWS] (1327)  
11 352 163 use emczd [EMBASE REVIEWS] (1765)  
12 353 274 use medall,emczd (111415)  
13 354 274 not 353 [PSYCINFO REVIEWS] (521)  
14 355 351 or 352 or 354 [REVIEWS - ALL DATABASES] (3613)  
15 356 remove duplicates from 355 (2316) [TOTAL UNIQUE REVIEWS]  
16 357 356 use medall [MEDLINE UNIQUE REVIEWS] (1314)  
17 358 356 use emczd [EMBASE UNIQUE REVIEWS] (853)  
18 359 356 not (357 or 358) [PSYCINFO UNIQUE REVIEWS] (149)  
19 360 49 use medall [MEDLINE RCTS] (2766)  
20 361 171 use emczd [EMBASE RCTS] (4104)  
21 362 282 use medall,emczd (111415)  
22 363 282 not 362 [PSYCINFO RCTS] (1504)  
23 364 360 or 361 or 363 [RCTS - ALL DATABASES] (8374)  
24 365 limit 364 to yr="2012-current" (4981)  
25 366 remove duplicates from 365 (2954)  
26 367 364 not 365 (3393)  
27 368 remove duplicates from 367 (2013)  
28 369 366 or 368 [TOTAL UNIQUE RCTS] (4967)  
29 370 369 use medall [MEDLINE UNIQUE RCTS] (2751)  
30 371 369 use emczd [EMBASE UNIQUE RCTS] (1881)  
31 372 369 not (370 or 371) [PSYCINFO UNIQUE RCTS] (335)  
32 373 68 use medall [MEDLINE NRCTS] (2156)  
33 374 189 use emczd [EMBASE NRCTS] (13613)  
34 375 296 use medall,emczd (6496)  
35 376 296 not 375 [PSYCINFO NRCTS] (1287)  
36 377 373 or 374 or 376 [NRCTS - ALL DATABASES] (17056)  
37 378 85 use medall [MEDLINE OBSERVATIONAL STUDIES] (9014)  
38 379 210 use emczd [EMBASE OBSERVATIONAL STUDIES] (11318)  
39 380 313 use medall,emczd (111415)  
40 381 313 not 380 [PSYCINFO OBSERVATIONAL STUDIES] (4774)  
41 382 378 or 379 or 381 [OBSERVATIONAL STUDIES - ALL DATABASES] (25106)  
42 383 377 or 382 [NRCTS, OBSERVATIONAL STUDIES - ALL DATABASES] (35890)  
43 384 limit 383 to yr="2018-current" (5258)  
44 385 remove duplicates from 384 (3489)  
45 386 limit 383 to yr="2016-2017" (5786)  
46 387 remove duplicates from 386 (3556)  
47 388 limit 383 to yr="2014-2015" (5227)  
48 389 remove duplicates from 388 (3216)  
49 390 limit 383 to yr="2012-2013" (4289)  
50 391 remove duplicates from 390 (2631)  
51 392 limit 383 to yr="2009-2011" (5305)  
52 393 remove duplicates from 392 (3349)  
53 394 limit 383 to yr="2005-2008" (5699)  
54  
55  
56  
57  
58  
59  
60

395 remove duplicates from 394 (3749)  
 396 limit 383 to yr="2000-2004" (4326)  
 397 remove duplicates from 396 (2919)  
 398 385 or 387 or 389 or 391 or 393 or 395 or 397 [TOTAL UNIQUE NRCTS, OBSERVATIONAL STUDIES] (22909)  
 399 398 use medall [MEDLINE UNIQUE NRCTS, OBSERVATIONAL STUDIES] (10253)  
 400 398 use emczd [EMBASE UNIQUE NRCTS, OBSERVATIONAL STUDIES] (11250)  
 401 398 not (399 or 400) [PSYCINFO UNIQUE NRCTS, OBSERVATIONAL STUDIES] (1406)  
 402 119 use medall [MEDLINE QUALITATIVE STUDIES] (6892)  
 403 244 use emczd [EMBASE QUALITATIVE STUDIES] (9063)  
 404 346 use medall,emczd (18959)  
 405 346 not 404 [PSYCINFO QUALITATIVE STUDIES] (7739)  
 406 402 or 403 or 405 [QUALITATIVE STUDIES - ALL DATABASES] (23694)  
 407 limit 406 to yr="2017-current" (4897)  
 408 remove duplicates from 407 (3033)  
 409 limit 406 to yr="2014-2016" (5456)  
 410 remove duplicates from 409 (3388)  
 411 limit 406 to yr="2010-2013" (5531)  
 412 remove duplicates from 411 (3350)  
 413 limit 406 to yr="2005-2009" (4995)  
 414 remove duplicates from 413 (3056)  
 415 limit 406 to yr="2000-2004" (2816)  
 416 remove duplicates from 415 (1737)  
 417 408 or 410 or 412 or 414 or 416 [TOTAL UNIQUE QUALITATIVE STUDIES - ALL DATABASES] (14563)  
 418 417 use medall [MEDLINE UNIQUE QUALITATIVE STUDIES] (6877)  
 419 417 use emczd [EMBASE UNIQUE QUALITATIVE STUDIES] (3597)  
 420 417 not (418 or 419) [PSYCINFO UNIQUE QUALITATIVE STUDIES] (4089)

\*\*\*\*\*

Cochrane Library

<https://www-cochranelibrary-com.proxy.bib.uottawa.ca/advanced-search/search-manager?search=3084048>

Search Name: Cannabis - Final  
 Date Run: 13/06/2019 01:27:59  
 Comment: OHRI - 2019 Jun 12

| ID | Search Hits                                                                                                                                                                              |
|----|------------------------------------------------------------------------------------------------------------------------------------------------------------------------------------------|
| #1 | [mh Cannabis] 290                                                                                                                                                                        |
| #2 | [mh Cannabinoids] 731                                                                                                                                                                    |
| #3 | [mh "Marijuana Abuse"] 524                                                                                                                                                               |
| #4 | [mh "Marijuana Use"] 284                                                                                                                                                                 |
| #5 | [mh "Marijuana Smoking"] 276                                                                                                                                                             |
| #6 | ("c.indica" or "c.sativa" or cannabi* or bhang or cannador or cbd or charas or eucannabinolide* or ganja or ganjah or hash or hashish or hemp or marihuana* or marijuana*):ti,ab,kw 4028 |
| #7 | (epidiolox or gwp 42003p or gwp42003p or nabidiolox):ti,ab,kw 30                                                                                                                         |
| #8 | (dronabinol or thc or tetrahydrocannabinol* or ea 1477 or ea1477 or marinol or qcd 84924 or syndros or tetrabinex or tetranabinex):ti,ab,kw 1387                                         |

1  
2  
3 #9 (cesamet or nabilone):ti,ab,kw 142  
4 #10 (deltanyne or "abbott 40566" or namisol or dronabinolum or "QCD 84924" or "CCRIS  
5 4726"):ti,ab,kw 16  
6 #11 (nabiximol\* or "gw 1000" or gw1000 or "sab 378" or sab378 or sativex):ti,ab,kw 167  
7 #12 {or #1-#11} with Publication Year from 2000 to 2019, in Trials 3638  
8 #13 {or #1-#11} in Cochrane Reviews, Cochrane Protocols 45  
9 #14 #12 OR #13 3683  
10

11 Reviews – 42  
12 Protocols – 3  
13 Trials – 3638  
14  
15  
16  
17  
18  
19  
20  
21  
22  
23  
24  
25  
26  
27  
28  
29  
30  
31  
32  
33  
34  
35  
36  
37  
38  
39  
40  
41  
42  
43  
44  
45  
46  
47  
48  
49  
50  
51  
52  
53  
54  
55  
56  
57  
58  
59  
60

**Appendix 3. Sample tables for presentation of findings**

**Table 1. Sample table depicting the presence/absence of demographic subgroups in observational studies.**

| Study              | Age groups |       |     | Sex/gender |       |       | Race/ethnicity |       |            |       |       |    | Marital status |        |          |         |    | Employment status |         |    | Accommodation status |        |    | Residential setting |                 |     |    |  |
|--------------------|------------|-------|-----|------------|-------|-------|----------------|-------|------------|-------|-------|----|----------------|--------|----------|---------|----|-------------------|---------|----|----------------------|--------|----|---------------------|-----------------|-----|----|--|
|                    | 50-64      | 65-74 | 75+ | Men        | Women | Other | Caucasian      | Black | Indigenous | Asian | Other | NR | Married        | Single | Divorced | Widowed | NR | Retired           | Working | NR | Alone                | Shared | NR | Community           | Retirement home | LTC | NR |  |
| Lee et al., 2012   |            |       |     |            |       |       |                |       |            |       |       |    |                |        |          |         |    |                   |         |    |                      |        |    |                     |                 |     |    |  |
| Smith et al., 2017 |            |       |     |            |       |       |                |       |            |       |       |    |                |        |          |         |    |                   |         |    |                      |        |    |                     |                 |     |    |  |

**Table 2. Sample table depicting the presence/absence of comorbidities and co-use in observational studies**

| Study              | Mental health comorbidities |            |          |               |                   |      |    | Physical comorbidities |              |          |                    |    | Co-use           |               |           |    |
|--------------------|-----------------------------|------------|----------|---------------|-------------------|------|----|------------------------|--------------|----------|--------------------|----|------------------|---------------|-----------|----|
|                    | Anxiety                     | Depression | Insomnia | Schizophrenia | Cognitive decline | PTSD | NR | Cancer                 | Chronic pain | Diabetes | Multiple sclerosis | NR | Prescribed drugs | Illicit drugs | No co-use | NR |
| Lee et al., 2012   |                             |            |          |               |                   |      |    |                        |              |          |                    |    |                  |               |           |    |
| Smith et al., 2017 |                             |            |          |               |                   |      |    |                        |              |          |                    |    |                  |               |           |    |



**Table 3. Sample table of types of cannabis use, products, and modes of consumption in observational studies**

| Study              | Cannabis use |             |       |    | Cannabis product |           |    | Mode of consumption |            |         |      |    |
|--------------------|--------------|-------------|-------|----|------------------|-----------|----|---------------------|------------|---------|------|----|
|                    | Medical      | Non-medical | Mixed | NR | Natural          | Synthetic | NR | Smoking             | Vaporizing | Edibles | Oils | NR |
| Lee et al., 2012   |              |             |       |    |                  |           |    |                     |            |         |      |    |
| Smith et al., 2017 |              |             |       |    |                  |           |    |                     |            |         |      |    |

1  
2  
3  
4  
5  
6  
7  
8  
9  
10  
11  
12  
13  
14  
15  
16  
17  
18  
19  
20  
21  
22  
23  
24  
25  
26  
27  
28  
29  
30  
31  
32  
33  
34  
35  
36  
37  
38  
39  
40  
41  
42  
43  
44  
45  
46  
47

**Table 4. Sample table of types of comparisons evaluated in primary studies**

| Study              | Comparison evaluated        |               |                  |             |                             |                     |
|--------------------|-----------------------------|---------------|------------------|-------------|-----------------------------|---------------------|
|                    | Use-only (single-arm study) | Use vs no use | Frequency of use | Strain type | Concentration of THC or CBD | Mode of consumption |
| Lee et al., 2012   |                             |               |                  |             |                             |                     |
| Smith et al., 2017 |                             |               |                  |             |                             |                     |

1  
2  
3  
4  
5  
6  
7  
8  
9  
10  
11  
12  
13  
14  
15  
16  
17  
18  
19  
20  
21  
22  
23  
24  
25  
26  
27  
28  
29  
30  
31  
32  
33  
34  
35  
36  
37  
38  
39  
40  
41  
42  
43  
44  
45  
46  
47

**Table 5. Sample table of all outcomes and direction of effects for observational studies. This table will likely be split into four, tables depending on outcomes reported: mental health/behavioural, physical health, brain, and pharmacokinetic outcomes. Green cells indicate a positive effect, red cells a negative effect, and grey cells a non-significant effect was found. Blank/white cells indicate an outcome was not measured.**

| Study and comparison<br><br>(Reference group is listed second) | Mental health/behavioural |            |                           |          |                 |                            | Physical health |               |       |           | Brain outcomes |                        |                         |                    |              |                  | Pharmacokinetic outcomes  |                                      |                                 |
|----------------------------------------------------------------|---------------------------|------------|---------------------------|----------|-----------------|----------------------------|-----------------|---------------|-------|-----------|----------------|------------------------|-------------------------|--------------------|--------------|------------------|---------------------------|--------------------------------------|---------------------------------|
|                                                                | Anxiety                   | Depression | Manic/ suicidal behaviour | Paranoia | Risky behaviour | New substance use disorder | Chronic pain    | Car accidents | Falls | ED visits | Gray matter    | White matter integrity | Functional connectivity | Cortical thickness | Total volume | Regional volumes | Surface morphometry/shape | Interactions with prescription drugs | Interactions with illicit drugs |
| Lee et al., 2012<br>Use vs no use                              | Green                     | Green      | Grey                      | White    | White           | Green                      | Grey            | White         | White | Grey      | White          | White                  | White                   | White              | White        | White            | White                     | White                                | White                           |
| Lee et al., 2012<br>High vs low conc of THC                    | Green                     | Green      | Green                     | White    | White           | Green                      | Grey            | White         | White | Green     | White          | White                  | White                   | White              | White        | White            | White                     | White                                | White                           |
| Lee et al., 2012                                               | Grey                      | Grey       | Grey                      | White    | White           | Grey                       | Grey            | White         | White | Grey      | White          | White                  | White                   | White              | White        | White            | White                     | White                                | White                           |

| Study and comparison<br><br>(Reference group is listed second) | Mental health/behavioural |            |                           |          |                 |                            | Physical health |               |       |           | Brain outcomes |                        |                         |                    |              |                  | Pharmacokinetic outcomes  |                                      |                                 |
|----------------------------------------------------------------|---------------------------|------------|---------------------------|----------|-----------------|----------------------------|-----------------|---------------|-------|-----------|----------------|------------------------|-------------------------|--------------------|--------------|------------------|---------------------------|--------------------------------------|---------------------------------|
|                                                                | Anxiety                   | Depression | Manic/ suicidal behaviour | Paranoia | Risky behaviour | New substance use disorder | Chronic pain    | Car accidents | Falls | ED visits | Gray matter    | White matter integrity | Functional connectivity | Cortical thickness | Total volume | Regional volumes | Surface morphometry/shape | Interactions with prescription drugs | Interactions with illicit drugs |
| Smoking vs vaping                                              |                           |            |                           |          |                 |                            |                 |               |       |           |                |                        |                         |                    |              |                  |                           |                                      |                                 |
| Smith et al., 2017<br><br>Daily vs weekly use                  |                           |            |                           |          |                 |                            |                 |               |       |           |                |                        |                         |                    |              |                  |                           |                                      |                                 |
| Smith et al., 2017<br><br>High vs low conc of THC              |                           |            |                           |          |                 |                            |                 |               |       |           |                |                        |                         |                    |              |                  |                           |                                      |                                 |

# BMJ Open

## The effects of medical and non-medical cannabis use in older adults: protocol for a scoping review

|                                 |                                                                                                                                                                                                                                                                                                                                                                                                                                                                                                                                                                                                                                                                                                                                                                                                                                                                                                                                                                                                                                                                                                                                                                                                                 |
|---------------------------------|-----------------------------------------------------------------------------------------------------------------------------------------------------------------------------------------------------------------------------------------------------------------------------------------------------------------------------------------------------------------------------------------------------------------------------------------------------------------------------------------------------------------------------------------------------------------------------------------------------------------------------------------------------------------------------------------------------------------------------------------------------------------------------------------------------------------------------------------------------------------------------------------------------------------------------------------------------------------------------------------------------------------------------------------------------------------------------------------------------------------------------------------------------------------------------------------------------------------|
| Journal:                        | <i>BMJ Open</i>                                                                                                                                                                                                                                                                                                                                                                                                                                                                                                                                                                                                                                                                                                                                                                                                                                                                                                                                                                                                                                                                                                                                                                                                 |
| Manuscript ID                   | bmjopen-2019-034301.R1                                                                                                                                                                                                                                                                                                                                                                                                                                                                                                                                                                                                                                                                                                                                                                                                                                                                                                                                                                                                                                                                                                                                                                                          |
| Article Type:                   | Protocol                                                                                                                                                                                                                                                                                                                                                                                                                                                                                                                                                                                                                                                                                                                                                                                                                                                                                                                                                                                                                                                                                                                                                                                                        |
| Date Submitted by the Author:   | 13-Jan-2020                                                                                                                                                                                                                                                                                                                                                                                                                                                                                                                                                                                                                                                                                                                                                                                                                                                                                                                                                                                                                                                                                                                                                                                                     |
| Complete List of Authors:       | Wolfe, Dianna; Ottawa Hospital Research Institute<br>Corace, Kimberly; University of Ottawa,<br>Rice, Danielle; Ottawa Hospital Research Institute<br>Smith, Andra; University of Ottawa, Brain and Mind Research Institute<br>Kanji, Salmaan; The Ottawa Hospital, Department of Pharmacy;<br>University of Ottawa, Faculty of Medicine<br>Conn, David; University of Toronto, Psychiatry<br>Willows, Melanie; The Royal Ottawa Mental Health Centre, Substance<br>Use and Concurrent Disorders Program<br>Garber, Gary; Public Health Ontario, Infection Prevention and Control;<br>University of Ottawa Faculty of Medicine, Medicine/infectious diseases<br>Puxty, John; Queen's University, Faculty of Medicine<br>Moghadam, Esther; Ottawa Public Health<br>Skidmore, Becky; Independent Information Specialist<br>Garrity, Chantelle; Ottawa Hospital Research Institute<br>Thavorn, Kednapa; The Ottawa Hospital Research Institute; Institute for<br>Clinical Evaluative Sciences, ICES @uOttawa<br>Moher, David; Ottawa Hospital Research Institute, Ottawa Methods<br>Centre<br>Hutton, Brian; Ottawa Hospital Research Institute; University of Ottawa,<br>School of Epidemiology and Public Health |
| <b>Primary Subject Heading</b>: | Public health                                                                                                                                                                                                                                                                                                                                                                                                                                                                                                                                                                                                                                                                                                                                                                                                                                                                                                                                                                                                                                                                                                                                                                                                   |
| Secondary Subject Heading:      | Geriatric medicine, Mental health, Addiction                                                                                                                                                                                                                                                                                                                                                                                                                                                                                                                                                                                                                                                                                                                                                                                                                                                                                                                                                                                                                                                                                                                                                                    |
| Keywords:                       | PUBLIC HEALTH, EPIDEMIOLOGY, GERIATRIC MEDICINE                                                                                                                                                                                                                                                                                                                                                                                                                                                                                                                                                                                                                                                                                                                                                                                                                                                                                                                                                                                                                                                                                                                                                                 |
|                                 |                                                                                                                                                                                                                                                                                                                                                                                                                                                                                                                                                                                                                                                                                                                                                                                                                                                                                                                                                                                                                                                                                                                                                                                                                 |

SCHOLARONE™  
Manuscripts



I, the Submitting Author has the right to grant and does grant on behalf of all authors of the Work (as defined in the below author licence), an exclusive licence and/or a non-exclusive licence for contributions from authors who are: i) UK Crown employees; ii) where BMJ has agreed a CC-BY licence shall apply, and/or iii) in accordance with the terms applicable for US Federal Government officers or employees acting as part of their official duties; on a worldwide, perpetual, irrevocable, royalty-free basis to BMJ Publishing Group Ltd ("BMJ") its licensees and where the relevant Journal is co-owned by BMJ to the co-owners of the Journal, to publish the Work in this journal and any other BMJ products and to exploit all rights, as set out in our [licence](#).

The Submitting Author accepts and understands that any supply made under these terms is made by BMJ to the Submitting Author unless you are acting as an employee on behalf of your employer or a postgraduate student of an affiliated institution which is paying any applicable article publishing charge ("APC") for Open Access articles. Where the Submitting Author wishes to make the Work available on an Open Access basis (and intends to pay the relevant APC), the terms of reuse of such Open Access shall be governed by a Creative Commons licence – details of these licences and which [Creative Commons](#) licence will apply to this Work are set out in our licence referred to above.

Other than as permitted in any relevant BMJ Author's Self Archiving Policies, I confirm this Work has not been accepted for publication elsewhere, is not being considered for publication elsewhere and does not duplicate material already published. I confirm all authors consent to publication of this Work and authorise the granting of this licence.

# The effects of medical and non-medical cannabis use in older adults: protocol for a scoping review

## Authorship List:

\*Wolfe D<sup>1</sup> ([dwolfe@ohri.ca](mailto:dwolfe@ohri.ca)); \*Corace K<sup>1,2,3,4</sup> ([kim.corace@theroyal.ca](mailto:kim.corace@theroyal.ca)); Rice D<sup>1,5</sup> ([danielle.rice@mail.mcgill.ca](mailto:danielle.rice@mail.mcgill.ca)); Smith A<sup>6</sup> ([andra.smith@uottawa.ca](mailto:andra.smith@uottawa.ca)); Kanji S<sup>1,7</sup> ([skanji@toh.ca](mailto:skanji@toh.ca)); Conn D<sup>8</sup> ([dconn@baycrest.org](mailto:dconn@baycrest.org)); Willows M<sup>2,3,4</sup> ([melanie.willows@theroyal.ca](mailto:melanie.willows@theroyal.ca)); Garber G<sup>9</sup> ([gary.garber@oahpp.ca](mailto:gary.garber@oahpp.ca)); Puxty J<sup>10</sup> ([puxtyj@providencecare.ca](mailto:puxtyj@providencecare.ca)); Moghadam E<sup>11</sup> ([esther.moghadam@ottawa.ca](mailto:esther.moghadam@ottawa.ca)); Skidmore B<sup>1</sup> ([bskidmore@rogers.com](mailto:bskidmore@rogers.com)); Garritty C<sup>1</sup> ([cgarritty@ohri.ca](mailto:cgarritty@ohri.ca)); Thavorn K<sup>1,12</sup> ([kthavorn@ohri.ca](mailto:kthavorn@ohri.ca)); Moher D<sup>1,12</sup> ([dmoher@ohri.ca](mailto:dmoher@ohri.ca)); Hutton B<sup>1,12</sup> ([bhutton@ohri.ca](mailto:bhutton@ohri.ca))

## Affiliations

<sup>1</sup>Ottawa Hospital Research Institute, Ottawa, Canada

<sup>2</sup>University of Ottawa, Faculty of Medicine, Department of Psychiatry, Ottawa, Canada

<sup>3</sup>University of Ottawa Institute of Mental Health Research, Ottawa, ON, Canada

<sup>4</sup>The Royal Ottawa Mental Health Centre, Ottawa, ON, Canada

<sup>5</sup>McGill University Department of Psychology, Montreal, Canada

<sup>6</sup>University of Ottawa, Brain and Mind Research Institute

<sup>7</sup>The Ottawa Hospital, Department of Pharmacy, Ottawa, Canada

<sup>8</sup>University of Toronto, Department of Psychiatry

<sup>9</sup>Public Health Ontario, Toronto, Ontario

<sup>10</sup>Queen's University, Faculty of Medicine, Kingston, Canada

<sup>11</sup>Ottawa Public Health, Ottawa, Canada

<sup>12</sup>University of Ottawa, School of Epidemiology and Public Health, Ottawa, Canada

\*denotes co-first authors; contributed equally to the planned research

## Corresponding Author:

Dr. Brian Hutton

Center for Practice Changing Research

The Ottawa Hospital

501 Smyth Road, PO Box 201B,

Ottawa, ON, K1H 8L6

Email: [bhutton@ohri.ca](mailto:bhutton@ohri.ca)

Phone: 613-737-8899, ext 73842

## Publication Details

Abstract Word Count: 305

Main Text Word Count: 5,496

## **ABSTRACT**

**Introduction.** With its legalization and regulation in Canada in 2018, the proportion of Canadians reporting cannabis use in 2019 increased substantially over the previous year, with half of new users being aged 45+ years. While use in older adults has been low historically, as those born in the 1950s and 1960s continue to age, this demographic will progressively have more liberal attitudes, prior cannabis exposure and higher use rates. However, older adults experience slower metabolism, increased likelihood of polypharmacy, cognitive decline and chronic physical/mental health problems. There is a need to enhance knowledge of the effects of cannabis use in older adults. The following question will be addressed using a scoping review approach: What evidence exists regarding beneficial and harmful effects of medical and non-medical cannabis use in adults  $\geq 50$  years of age? Given that beneficial and harmful effects of cannabis may be mediated by patient-level (e.g., age, sex, race) and cannabis-related factors (e.g., natural vs synthetic, consumption method), subgroup effects related to these and additional factors will be explored.

**Methods and Analysis.** Methods for scoping reviews outlined by Arksey & O'Malley and the Joanna Briggs Institute will be used. A librarian designed a systematic search of the literature from database inception to June 2019. Using the OVID platform, Ovid MEDLINE® will be searched, including Epub Ahead of Print and In-Process & Other Non-Indexed Citations, Embase Classic+Embase, and PsycINFO for reviews, randomized trials, non-randomized trials, and observational studies of cannabis use. The Cochrane Library on Wiley will also be searched. Eligibility criteria will be older adult participants, currently using cannabis (medical or non-medical), with studies required to report a cannabis-related health outcome to be eligible. Two reviewers will screen citations and full texts, with support from artificial intelligence. Two reviewers will chart data. Tables/graphics will be used to map evidence and identify evidence gaps.



1  
2  
3 ***Ethics and Dissemination.*** This research will enhance awareness of existing evidence addressing  
4 the health effects of medical and non-medical cannabis use in older adults. Findings will be  
5 disseminated through a peer reviewed publication, conference presentations and a stakeholder  
6 meeting.  
7  
8  
9  
10  
11  
12  
13  
14  
15  
16

17 **Keywords:** *medical cannabis; recreational cannabis; cannabis; elderly; seniors; scoping review;*  
18 *knowledge synthesis*  
19  
20  
21

22 **Open Science Framework Registration:** DOI 10.17605/OSF.IO/5JTAQ  
23  
24  
25  
26  
27  
28  
29  
30  
31  
32  
33  
34  
35  
36  
37  
38  
39  
40  
41  
42  
43  
44  
45  
46  
47  
48  
49  
50  
51  
52  
53  
54  
55  
56  
57  
58  
59  
60

## **STRENGTHS AND LIMITATIONS OF THE STUDY**

- This study will use a rigorous approach to scoping reviews to explore the health effects (both beneficial and harmful) of cannabis in the elderly, addressing a currently important knowledge gap for this population.
- The research will address a large volume of literature which has not previously been synthesized.
- This scoping review will include systematic reviews, randomized and non-randomized studies, and observational data.
- Grey literature will not be reviewed given the anticipated volume of peer-reviewed literature.
- This review will not formally assess the quality of included studies.

## **INTRODUCTION**

Until it was legalized in 2018, cannabis was the most widely used illicit substance in Canada [1]. However, many of the health impacts of cannabis, both positive and negative, have yet to be rigorously studied, given the ethics of conducting randomized controlled trials (RCTs) on illicit substances with perceived harms. Legalization has increased access to cannabis, resulting in potential benefits as well as potential harms to consumers, including, but not limited to increased risks of substance use disorder, accidents, injuries, and presentations to emergency departments [2,3]. These potential harms extend across all age groups. However, the effects of the aging process may mediate many cannabis-related harms in older adults that are not experienced in younger age groups. Although the proportion of middle-aged to older adults reporting cannabis use was relatively low prior to legalization in October 2018—9% amongst those 45 years and older, in early 2018 [4]—it has risen markedly in the months since legalization, to 14% in the first quarter of 2019 [4]. In addition to legalization, as the cohort of individuals born in the 1950s and 1960s ages, it brings with it more liberal attitudes, prior exposure to cannabis, and higher use rates [5]. Despite rising usage rates in this age group, the depth of available evidence regarding the health impacts of cannabis use in older adults is not known.

Cannabinoids are active at the endocannabinoid system (ECS), a series of neuromodulatory lipids and receptors located throughout the central and peripheral nervous systems, immune and hematopoietic systems, and many peripheral organs [6]. The presence of the ECS throughout the body implies the potential for widespread effects of cannabinoids, both beneficial and harmful. Delta-9 tetrahydrocannabinol (THC) and cannabidiol (CBD) are the predominant components of most cannabis products [7]. As well as some potential therapeutic benefits, THC is responsible for the intoxication and dependence associated with cannabis use and is the primary psychoactive

1  
2  
3 component of natural cannabis [7]. In contrast, CBD has no intoxicating effects or abuse liability,  
4  
5 and because of its widespread activity in the ECS, it has been proposed to be beneficial  
6  
7 therapeutically for a variety of health conditions [7]. Numerous potential therapeutic indications  
8  
9 for medical cannabis have been evaluated in the literature, including but not limited to the control  
10  
11 of nausea and vomiting associated with chemotherapy, relief of spasticity in multiple sclerosis  
12  
13 patients, prevention of graft-versus-host disease in allogeneic hematopoietic stem cell  
14  
15 transplantation, control of epilepsy and schizophrenia, ocular pressure reduction in glaucoma,  
16  
17 HIV/AIDS-associated weight loss, and the control of central, peripheral, and chronic neuropathic  
18  
19 pain of various etiologies [8,9]. As with many novel interventions, the results have varied by  
20  
21 indication, with demonstrable benefits over harms for only some indications. Cannabis as a  
22  
23 medical product became possible with the purification of whole plant extracts from *Cannabis*  
24  
25 *sativa L.*, including purified THC, CBD, and THC and CBD in a 1:1 ratio (nabiximols) [8].  
26  
27 Medical cannabis has been furthered through the development of various synthetic cannabinoids  
28  
29 (e.g., the synthetic THC analogue, nabilone, and synthetic THC, dronabinol) [9]. Synthetic  
30  
31 modification of the molecular structure of THC and CBD to create new synthetic molecules has  
32  
33 the potential to widen the range of available cannabis products for medical and non-medical use  
34  
35 and their effects on the body.  
36  
37  
38  
39  
40  
41  
42

43 Generally, older adults suffer from more chronic medical and mental health conditions (e.g.,  
44  
45 chronic pain, insomnia, mood and cognitive disorders) than younger adults [10,11]. Anecdotal  
46  
47 reports suggest that older adults may be attracted to cannabis as a means to ameliorate symptoms  
48  
49 of these chronic medical conditions [12]. As well, lifestyle changes that frequently occur in older  
50  
51 adulthood, such as retirement or loss of a spouse, may lead to social isolation, increased leisure  
52  
53 time, or loss of meaningful work, and contribute to increased cannabis use [12]. However, while  
54  
55  
56  
57  
58  
59  
60

1  
2  
3 cannabis may be perceived by some patients to improve physical or mental health symptoms, older  
4 adults using cannabis either medically or recreationally may be unaware of changes that occur with  
5 age that may lead to varying and potentially harmful effects. Past research has demonstrated that  
6 cognitive function, attention, memory, and executive function—including abilities for impulse  
7 control, problem solving, and reasoning—are reduced with increasing age, and that consumption  
8 of drugs, including cannabis, has been associated with worsening and/or pronouncement of these  
9 deteriorations [13–15]. Aging is also associated with structural changes to both gray and white  
10 brain matter that correlate with brain function [16], and the use of cannabis can exacerbate these  
11 structural changes. Polypharmacy of prescription medications is widespread in the older adult  
12 population [17], and there is some evidence of negative drug interactions between cannabis and  
13 prescription and non-prescription medications [18–21], another important consideration for older  
14 adults. Finally, age-related alterations in the pharmacokinetics of drugs can have a direct impact  
15 on the psychoactive effects sought by recreational users, the beneficial health effects sought by  
16 medicinal users, and the harmful side-effects potentially experienced by both [13,22].

17  
18  
19 Although systematic and scoping reviews have been conducted on cannabis use in younger age  
20 groups [23–27], age-related changes to the brain and pharmacodynamics suggest that there may  
21 be many important differences in the effects of cannabis in older adults compared to younger  
22 cohorts. Cannabis research literature is diverse and vast, which challenges systematic review  
23 methods. A scoping review would collate and map the available research on cannabis effects in  
24 older adults, demonstrating what topic areas may have sufficient evidence for future systematic  
25 review. As well, collation and mapping of the research evidence is a first step for the purposes of  
26 informing care, developing policy, and directing future primary research efforts. A recent overview  
27 of systematic reviews evaluating the effectiveness of medical cannabis for any indication identified

73 relevant reviews [28], of which one was identified as highly relevant to older adults [29]. In the planned research, we will conduct a scoping review of systematic reviews, RCTs, non-randomized studies (NRS) and observational studies to address the following research questions:

What evidence exists regarding the beneficial and harmful effects of medical and non-medical cannabis use in older adults?

What is known from the existing literature about the beneficial and harmful effects of medical and non-medical cannabis use in older adults in the following sub-populations, concepts, and contexts:

- Age: using older adult age groupings reported in the included literature?
- Sex or gender?
- Race or ethnicity?
- Mental or physical comorbidities?
- Frailty?
- Use of other prescription or non-prescription drugs, alcohol, or illicit substances?
- Consumption method (i.e., smoking, vaporizing, oils, edibles, etc.)?
- Residential setting (e.g., community, retirement home, long-term care)?
- Employment status (e.g., working, retired) or income level?
- Marital status (e.g., single, married, widowed, divorced)?
- Accommodation status (i.e., alone, shared, homeless)?

## **METHODS AND ANALYSIS**

This research will be undertaken using a scoping review approach, underpinned by the framework proposed by Arskey and O'Malley [30]. A scoping review maps the existing sources and types of evidence in a field of interest, and can be used to summarize and disseminate research findings to

1  
2  
3 knowledge users [30]. Our methods will be guided by several resources, including the scoping  
4 review methodology manual published by the Joanna Briggs Institute (JBI) [31] and other recent  
5 methods guidance [32–34].  
6  
7  
8  
9

### 10 11 **Protocol and Registration**

12 This protocol has been drafted to adhere to the Preferred Reporting Items for Systematic Reviews  
13 and Meta-analysis Protocols (PRISMA-P; **Appendix 1**). The protocol has been registered with the  
14 Open Science Framework (DOI 10.17605/OSF.IO/5JTAQ). Given the reflexive and iterative  
15 nature of scoping reviews [30], amendments to the registered protocol are anticipated and will be  
16 described in the final study report.  
17  
18  
19  
20  
21  
22  
23  
24

### 25 **Eligibility Criteria**

26 Following the guidance of Arskey and O'Malley, our eligibility criteria will be adjusted as we  
27 develop familiarity and further expertise with the literature. We based our eligibility criteria on the  
28 PCC (Participants – Concept – Context) criteria [31] as follows:  
29  
30  
31  
32  
33

- 34 • **Participants.** Adults aged 50 years and older of any sex/gender or race, who currently use  
35 cannabis, with or without other substances (e.g., tobacco, alcohol, illicit drugs) will be of  
36 interest.  
37  
38  
39  
40
- 41 • **Age:** Studies or systematic reviews not explicitly reporting age data but evaluating  
42 patients with dementia/Alzheimer's disease, Parkinson's disease, or advanced or  
43 end-stage cancer will be included. In a recent review of cannabinoids in palliative  
44 medicine, included studies had age ranges >50 years when the population evaluated  
45 was patients with Alzheimer's disease or cancer-related pain, anorexia/cachexia,  
46 nausea and vomiting, or sleep disturbance [35]. More conditions specific to older  
47 adults may be identified as we progress through the review. Given that many studies  
48  
49  
50  
51  
52  
53  
54  
55  
56  
57

1  
2  
3 will include patients both younger and older than 50 years of age, we will include  
4 studies that report age-stratified analyses for an age group of 50 years or older. If  
5 age-stratified findings are not reported in a primary study, but 80% or more of the  
6 sample is 50 years of age or older, the study will be included. Similarly, if age data  
7 are not reported but patients with any of the health conditions identified above are  
8 included amongst patients with other health conditions, to be included, the study  
9 must have reported a condition-stratified analysis or 80–100% of the patients must  
10 have one of the identified conditions. *Therefore, for the purposes of this protocol,*  
11 *“older adult studies” are those in which (a) 80–100% of the sample is 50+ years*  
12 *of age, (b) if age data are not reported, 80–100% of the sample has*  
13 *dementia/Alzheimer’s disease, Parkinson’s disease, or advanced/end-stage*  
14 *cancer, or (c) an age- or condition-stratified analysis is reported for an age group*  
15 *over 50 years or one of the identified conditions.*

- 16 • **Current use:** The definition of “current use” will likely be variable across studies  
17 (e.g., daily, weekly, past-month, past-year); however, we will not include studies  
18 evaluating use more than one year in the past. Older adults who are ex-users but are  
19 not currently using will not be of interest (e.g., those who used as adolescents).  
20 Patients with or without a mental or physical health comorbidity will be included.  
21 Studies and reviews evaluating younger as well as older adults will be included, if  
22 data have been reported for an age group of 50 years or older.
- 23 • **Comorbidities:** Examples of comorbidities include cancer (active or in remission),  
24 chronic pain, diabetes, anxiety, cognitive decline, dementia, depression, insomnia,  
25 post-traumatic stress disorder, and schizophrenia.



- 1  
2  
3  
4  
5  
6  
7  
8  
9  
10  
11  
12  
13  
14  
15  
16  
17  
18  
19  
20  
21  
22  
23  
24  
25  
26  
27  
28  
29  
30  
31  
32  
33  
34  
35  
36  
37  
38  
39  
40  
41  
42  
43  
44  
45  
46  
47  
48  
49  
50  
51  
52  
53  
54  
55  
56  
57  
58  
59  
60
- **Concept.** The concept of relevance for the review is characterized below in terms of both the interventions and outcomes of interest for this research, and are as follows:
    - **Interventions:** Medical (i.e., either under the care of a medical professional or patient-defined) or non-medical cannabis, of any type, with any mode of consumption (e.g., smoking, vaporizing, oils, edibles), and any dosage will be included. All types of cannabis will be of interest, including whole-plant cannabis; purified whole-plant extracts from *Cannabis sativa L.* (e.g., purified THC, CBD, and 1:1 THC:CBD); synthetic cannabinoids, such as synthetic THC (e.g., dronabinol, nabilone), CBD, and their derivatives, developed through modification of the molecular structure; and other cannabinoids, whether found in the cannabis plant or elsewhere, that are not THC or CBD but that interact with the ECS [36].
    - **Outcomes:** Both beneficial and harmful effects of cannabis use on physical and mental health will be considered. These will include but not be limited to the following:
      - harmful physical health effects (e.g., falls, fractures, head injuries, emergency department visits, car accidents, cardiovascular effects, respiratory effects, non-adherence to other drugs);
      - beneficial physical effects (e.g., improvements in nausea, vomiting, pain, muscle spasticity, tremors, quality of life);
      - harmful mental health and behavioural outcomes (e.g., increased risky, manic, and suicidal behaviours; increased cannabis use disorder, cannabis abuse, cannabis dependence, or “problematic” cannabis use; increased or

1  
2  
3 new anxiety, paranoia/psychosis, delirium, depression, sleep disturbance,  
4 reduced quality of life);

- 5  
6  
7  
8 ○ beneficial mental health and behavioural outcomes (e.g., decreased risky,  
9 manic, and suicidal behaviours; decreased cannabis use disorder, cannabis  
10 abuse, cannabis dependence, or the word “problematic” or “problem” in  
11 juxtaposition to the phrase “cannabis use;” decreased anxiety, paranoia,  
12 delirium, depression, chronic pain, sleep, improved quality of life, improved  
13 post-traumatic stress disorder);
- 14  
15  
16 ○ physical brain outcomes (e.g., effects on gray matter, white matter integrity,  
17 functional connectivity, cortical thickness, total and regional volumes,  
18 surface morphometry/shape);
- 19  
20  
21 ○ pharmacokinetic impacts (e.g., comparative pharmacokinetics of cannabis  
22 in older vs younger adults, drug interactions between cannabis and other  
23 prescription/non-prescription/illicit drugs).

24  
25  
26 We will exclude single-arm studies that only report prevalence or incidence of cannabis  
27 use.

- 28  
29  
30  
31  
32  
33  
34  
35  
36  
37  
38  
39  
40 • **Context.** Only studies focused on current cannabis consumption will be eligible. All  
41 settings are of interest in any geographic area. Consumption of other illicit or prescribed  
42 pharmaceuticals will be allowed. All periods of time and duration of follow-up will be  
43 eligible.
- 44  
45  
46  
47  
48  
49 • **Types of studies.** Systematic reviews, randomized controlled trials (RCTs), NRSs, and  
50 observational studies will be included. We will exclude diagnostic test accuracy studies,  
51 and studies developing or validating diagnostic criteria for cannabis use disorder or other  
52  
53  
54  
55  
56  
57  
58  
59  
60

1  
2  
3 cannabis-related mental health disorders. Editorials, letters, commentaries, abstracts, case  
4 reports, and narrative reviews will also be excluded. Only English and French publications  
5 will be considered for reasons of timeliness and cost. Grey literature will not be reviewed  
6 given the anticipated volume of peer-reviewed literature to be screened (based on our  
7 preliminary search (see Appendix 2)) as well as timeline and budget considerations.  
8  
9  
10  
11  
12  
13

14  
15 We will define a systematic review as being a review with a clearly specified review question that  
16 incorporates a systematic search of two or more electronic literature databases, clearly defined  
17 eligibility criteria, systematic study selection and data collection by two or more reviewers, an  
18 appraisal of the risk of bias of included studies, and a synthesis of all information using a  
19 quantitative or qualitative approach. Review articles not meeting these criteria will be excluded.  
20  
21 Non-randomized studies may include non-randomized, quasi-randomized, or single-arm trials  
22 (e.g., Phase I trials). Observational studies of any design will be included, except case reports and  
23 case series of fewer than 25 patients. Qualitative studies will be excluded.  
24  
25  
26  
27  
28  
29  
30  
31  
32  
33

### 34 35 **Information Sources and Search Strategy**

36 Preliminary basic searches of the literature identified an extremely high volume of references  
37 relevant to medical and non-medical cannabis (e.g., >120,000 records). We worked closely with  
38 an experienced information specialist to iteratively develop a search strategy that will balance the  
39 need for inclusivity with the need to yield a citation volume that will be manageable with current  
40 reference management software, within the budgetary and time constraints of the review  
41 (estimated completion date June 2020). To balance these opposing needs, alternative strategies  
42 will be considered, including restriction on date of publication, and application of filters for  
43 participant age (i.e.,  $\geq 50$  years of age) or study designs of interest to the identified cannabis  
44 literature base.  
45  
46  
47  
48  
49  
50  
51  
52  
53  
54  
55  
56  
57  
58  
59  
60

1  
2  
3 Using the OVID platform, we will search Ovid MEDLINE®, including Epub Ahead of Print and  
4 In-Process & Other Non-Indexed Citations, Embase Classic+Embase, and PsycINFO. We will  
5  
6 also search the Cochrane Library on Wiley. Databases will be searched from 1947 until June 11,  
7  
8 2019.  
9  
10

11  
12  
13 Search strategies will utilize a combination of controlled vocabulary (e.g., “*cannabis*,”  
14 “*cannabinoids*,” “*marijuana use*”) and keywords (e.g., “*marijuana*,” “*CBD*,” “*Sativex*”). Filters  
15  
16 for the research designs of interest will be applied to the Ovid searches. Vocabulary and syntax  
17  
18 will be adjusted across the databases searched as needed. When possible, animal-only, opinion  
19  
20 pieces and case studies will be removed from the search results. Conference abstracts will be  
21  
22 removed from Embase and Cochrane CENTRAL. Specific details regarding the strategies are  
23  
24 provided in **Appendix 2**. The final search strategy will be peer reviewed by another senior  
25  
26 information specialist using the Peer Review of Electronic Search Strategies (PRESS) Checklist  
27  
28 [37].  
29  
30  
31  
32  
33  
34

### 35 **Study Selection Process and Data Management**

36  
37 A sequential approach to study selection will be employed. We will prioritize screening and  
38  
39 selection of systematic reviews first, given they are syntheses of findings from primary research  
40  
41 studies, followed by NRSs and observational studies, and then RCTs. Non-randomized and  
42  
43 observational studies will be prioritized for screening and selection above RCTs due to the  
44  
45 expectation that (a) the majority of relevant recreational cannabis research will not be derived from  
46  
47 RCTs, given the illegality of recreational cannabis throughout much of the world over the last 20  
48  
49 years; and (b) the expectation that much of the evidence pertaining to applications of medical  
50  
51 cannabis from RCTs will be identified in included systematic reviews identified earlier in the study  
52  
53 selection process. We will iteratively adjust our study selection based on the findings from each  
54  
55  
56  
57  
58  
59  
60

1  
2  
3 search result set, developing stop rules or refining terminology as needed. As noted earlier, any  
4  
5 adjustments will be noted in the final study report to maximize transparency in the research  
6  
7 approach.  
8  
9

10  
11 The online systematic review management software DistillerSR® will be used for database  
12  
13 management and study selection (Evidence Partners Incorporated, Ottawa, Canada;  
14  
15 www.evidencepartners.com). Generally, across the study design strata, two levels of reference  
16  
17 screening will be conducted using a priori developed screening forms. A pilot exercise of a random  
18  
19 sample of references will be conducted prior to starting each level to ensure high inter-rater  
20  
21 reliability. Initially, titles and abstracts will be screened, with those references demonstrating  
22  
23 potential relevance progressing to the next level, where their full texts will be assessed for  
24  
25 relevance. At both levels, a liberal accelerated approach will be used: one reviewer will be required  
26  
27 to include a paper, while agreement of two reviewers will be required to exclude [38].  
28  
29 Disagreements during title/abstract screening will result in a reference automatically progressing  
30  
31 to the next level, where the full text will provide more information upon which to base a decision.  
32  
33 At full-text screening, disagreements will be resolved by discussion or by the decision of a third  
34  
35 reviewer.  
36  
37  
38  
39  
40

### 41 42 **Title/Abstract Screening** 43

44  
45 Initial screening will be designed to rapidly eliminate clearly irrelevant records. For each study  
46  
47 design dataset, key word searches for terms related to adolescents and young adults will be  
48  
49 conducted in the titles and abstracts, and the references identified by these searches as related to  
50  
51 younger adults/adolescents will be split from the main dataset. Both datasets (i.e., the main dataset  
52  
53  
54  
55  
56  
57

1  
2  
3 and the younger adult dataset) will be screened separately using the same methods described  
4  
5 below.  
6  
7

8  
9 Systematic review datasets will be screened with two levels of title/abstract screening: Level *1a*  
10 will screen for terms related to older age and current cannabis use, while Level *1b* will identify  
11 references with any cannabis-related outcomes. Primary study datasets (i.e., NRS/observational  
12 and RCT) will have a single level of title/abstract screening to identify references of relevance to  
13 older adults, current cannabis use, and any cannabis-related outcome.  
14  
15  
16  
17  
18  
19  
20

21 Studies where relevance to older adults is unclear will be included to allow determination of age  
22 during full-text screening (i.e., if both younger and older patients are included, the reference will  
23 be included at title/abstract screening to determine if disaggregated results were reported in the  
24 full text). For title/abstract screening, the terms “psychedelic” and “hallucinogen” will be eligible;  
25 however, at full-text screening, cannabis use must be explicitly reported. Similarly, for  
26 title/abstract screening, any cannabis-related outcome will be eligible, where cannabis is the  
27 exposure/intervention (i.e., cannabis use should occur prior to the outcome). Case-control studies  
28 where a temporal association is not apparent will be included at title/abstract screening for further  
29 determination during full-text screening. Cannabis use as an outcome will not be eligible (e.g.,  
30 studies evaluating associations between genes and cannabis use, evaluations of interventions to  
31 reduce cannabis use, single-arm studies reporting cannabis prevalence). However, cannabis use  
32 disorder (or similar) as an outcome will be eligible, where different types of cannabis use are  
33 compared as exposures/interventions. Diagnostic test accuracy evaluations and studies developing  
34 or validating diagnostic criteria for cannabis use disorder or other cannabis-related mental health  
35 disorders will be excluded.  
36  
37  
38  
39  
40  
41  
42  
43  
44  
45  
46  
47  
48  
49  
50  
51  
52  
53  
54  
55  
56  
57  
58  
59  
60

## Full-Text Screening

Full-text screening will follow a similar process for all study designs. Initially, references without full texts available in either English or French will be excluded. Subsequently, references that do not report results relevant to older adults will be excluded, followed by those that do not report a relevant cannabis-related outcome, and those in which cannabis use is not current. See the “Eligibility Criteria” section regarding definitions of “older adult study,” “cannabis-related outcome,” and “current cannabis use.” The following criteria are study-design specific:

- Systematic reviews: must report **synthesized** results of older adult studies, whether in terms of a meta-analysis or narrative approach. If a narrative summary was used, it must include either quantitative results or a statement of the direction of effect cannabis use, with or without significance stated. Narrative summaries must appear in the Results section of the review, and not be limited to more general comments within the Discussion section. Reviews that by chance narratively summarize older adult studies, without acknowledging that the patient population was older, will be excluded because the inferences derived from the synthesis by the authors would not have been applied to the context of older adults. For final inclusion, systematic reviews must meet the definition of a systematic review described in the eligibility criteria. Systematic reviews reviewed in full text that reported relevant outcome data for one or more primary studies on older adults amongst many other primary studies on younger adults will be flagged to capture the citations of the older adult primary studies.
- Primary studies: must meet the definition of “older adult studies” as defined in the eligibility criteria.

1  
2  
3 Systematic reviews and primary studies focused strictly on adults over 50 years of age or, if age is  
4 not reported, on one of the eligible health conditions will have higher priority for subsequent data  
5 charting over studies that also include younger adults or other health conditions.  
6  
7  
8  
9

### 10 11 **Use of Artificial Intelligence (AI) Software** 12

13  
14 Given the large number of anticipated search results, especially for the NRS and observational  
15 study stratum (>20,000 records), we will employ artificial intelligence (AI) methods available in  
16 DistillerSR software (Evidence Partners, Incorporated; Ottawa, Canada) where deemed feasible  
17 and reliable to inform the screening process. The available machine learning engines include both  
18 support vector machine (SVM) and Naïve Bayes classifiers. We will manually screen through the  
19 full text level a set of 300 or more references, which will be used to train the combined SVM and  
20 Naïve Bayes classifiers to generate a probability of relevance score valued at 0 (exclude), 0.5  
21 (unclear) or 1 (include) for each reference in the database. These scores will be used to identify  
22 clearly non-relevant citations (i.e., those citations with a probability of 0). These citations will be  
23 grouped to be checked by a second human reviewer to confirm exclusion. The remaining studies  
24 that received probabilities of 0.5 or 1 will be sorted according to their relevance probability  
25 estimated by the empirical Naïve Bayes classifier, which is a continuous score between 0 and 1,  
26 to allow for prioritized screening. The Naïve Bayes classifier will be rerun and citations re-ordered  
27 after batches of 100 citations or more, depending on the size of the database and the inclusion rate.  
28 Prioritized screening will be performed using the liberal accelerated approach described earlier  
29 involving two reviewers, with the prioritized element allowing for earlier identification of eligible  
30 studies. A flow diagram will be presented in all reports to document the process of study selection.  
31  
32  
33  
34  
35  
36  
37  
38  
39  
40  
41  
42  
43  
44  
45  
46  
47  
48  
49  
50  
51  
52  
53  
54  
55  
56  
57  
58  
59  
60



## Data Charting

Included studies will be prioritized for charting by study design. Systematic reviews will be charted first, followed by NRSs and observational studies, then RCTs. RCTs will be charted last, given that most will have already been captured in the data synthesized by the included systematic reviews. Using this approach, if, for example, a large volume of high-quality evidence is identified in systematic reviews related to applications of medical cannabis, it may provide rationale to limit the amount of data extraction from similarly focused RCTs.

A standardized data charting form will be developed in DistillerSR<sup>®</sup> (Evidence Partners Incorporated, Ottawa, Canada; [www.evidencepartners.com](http://www.evidencepartners.com)) that will be refined during the data charting process as reviewers enhance their knowledge of the content area, in keeping with the iterative and reflexive nature of scoping reviews. Prior to data charting from references of a given study design, the charting form will be piloted by all reviewers who will chart data on a random sample of three articles [31]. Given the large number of anticipated included articles, we will (a) consider charting data in stages, starting with study-level data, then progressing to demographic/context data, then outcomes; and (b) have one reviewer chart study-level and demographic/context data, with a second reviewer verifying this information. To minimize errors of subjective interpretation of information that is critical to the review objectives, charting of the outcomes of each study will be conducted independently by two reviewers, followed by conflict resolution by discussion, with input from a third reviewer if necessary [39].

Items for data charting will include the following information:

- **Manuscript/study-level data:** study authors; year of publication; country of study or if not reported, country of first author; funding source; study design (i.e., systematic review,

1  
2  
3 RCT, NRS, observational study); objective; sample size. For systematic reviews, the  
4 number of included studies and patients will be charted.  
5  
6

- 7  
8 • **Population demographics:** proportion of male/female/other participants, mean age/age  
9 distribution/age-related inclusion criteria, race/ethnicity distribution, employment status  
10 distribution, primary residence data (i.e., community, retirement home, long-term care  
11 facility), marital status data, accommodation status distribution (i.e., shared or alone),  
12 population data regarding mental health comorbidities (e.g., anxiety, depression, insomnia,  
13 schizophrenia) and physical health comorbidities (e.g., chronic pain, diabetes, cancer), data  
14 regarding co-use of other substances (yes/no, specify substances)  
15  
16 • **Type of cannabis consumption:** medical/non-medical/mixed, type of cannabis products  
17 consumed (e.g., whole plant/natural, synthetic, and names of strains/synthetic compounds  
18 evaluated), mode of consumption (e.g., smoking, vaporizing, edibles, oils), ratio of  
19 THC:CBD, concentration, dose.  
20  
21 • **Comparison evaluated:** no comparison (i.e., use-only single-arm studies) or comparisons  
22 of *cannabis descriptors* (e.g., use vs no use, frequencies of use, strain types, THC or CBD  
23 concentrations, THC:CBD ratios, modes of consumption) or *participant descriptors* (e.g.,  
24 sexes/genders, age groups, races/ethnicities, employment statuses, primary residences (i.e.,  
25 community, retirement home, long-term care facility), marital statuses, accommodation  
26 statuses (i.e., shared or alone), mental health comorbidities, physical health comorbidities,  
27 co-uses of other substances).  
28  
29 • **Outcomes:** For each outcome of interest reported (see eligibility criteria), the outcome  
30 definition, duration of follow-up, direction of effect, and significance will be charted.  
31  
32  
33  
34  
35  
36  
37  
38  
39  
40  
41  
42  
43  
44  
45  
46  
47  
48  
49  
50  
51  
52  
53  
54  
55  
56  
57  
58  
59  
60

1  
2  
3 Given this is a scoping review, all outcomes of interest will have equal priority. For  
4 systematic reviews, the authors' synthesized findings will be charted.  
5  
6

- 7 • Key findings identified by authors that are related to our review objectives.  
8  
9

### 10 11 **Critical appraisal of included evidence sources**

12 Quality appraisal of included systematic reviews will be conducted using the AMSTAR-2 tool  
13 [40] to identify evidence from high-quality reviews during synthesis. In keeping with scoping  
14 review methodology [31,41], formal assessment of the risk of bias in primary studies will not be  
15 undertaken.  
16  
17  
18  
19  
20  
21

### 22 23 **Synthesis and presentation of the results**

24 Mapping of the included evidence will be conducted in Microsoft Excel® (Microsoft Corporation,  
25 Seattle, Washington, USA), SmartDraw® (SmartDraw Software, LLC, San Diego, USA) and other  
26 software as needed, with results being presented using a combination of tabular, graphical, and  
27 narrative approaches. When presenting tabular data, we will group studies based upon underlying  
28 characteristics of interest, depending on the available data. These characteristics may include study  
29 design, analysis type, type of cannabis use (medical vs non-medical), or outcome type reported  
30 (i.e., mental health/behavioural, physical health, brain, and pharmacokinetic). Separate tables will  
31 be generated for each study design reviewed (e.g., systematic reviews, RCTs, NRSs and  
32 observational studies). Organizing data by outcome in tables may allow identification of  
33 comparisons across study design type, while also informing identification of contradictory results,  
34 if present. Visualization of results will be aided by using coloured table cells to indicate presence  
35 of subgroups. Similarly, outcome data will be presented with cell colour indicating direction of  
36 effect (e.g., studies with positive findings for an outcome would receive a green cell, negative  
37 findings a red cell, and non-significant findings a grey cell). Sample tables have been provided in  
38  
39  
40  
41  
42  
43  
44  
45  
46  
47  
48  
49  
50  
51  
52  
53  
54  
55  
56  
57

1  
2  
3 **Appendix 3.** Bar graphs, pie charts, geographic maps, bubble plots and other approaches will also  
4  
5 be used to present trends of the evidence base in terms of characteristics such as year of publication,  
6  
7 country of study, patient demographic traits (e.g., sex/gender, comorbidities). To augment tabular  
8  
9 and graphical presentations, we will also provide structured descriptive summaries of study  
10  
11 characteristics and outcomes to elaborate upon the evidence base and to identify topics associated  
12  
13 with considerable information versus a current lack of primary research. Final reporting of the  
14  
15 scoping review will follow the PRISMA extension for scoping reviews (PRISMA-ScR) [42].  
16  
17  
18  
19

### 20 **Dissemination and Ethics**

21  
22 Scoping reviews involve the performance of reviewing and collecting data from publicly available  
23  
24 information, and thus this research does not require ethics approval. Strategies for dissemination  
25  
26 will include a peer reviewed publication, conference presentations and engagement with  
27  
28 knowledge users as outlined in the Discussion section below.  
29  
30  
31  
32  
33

### 34 **Patient and Public Involvement**

35  
36 In planning this research, input was sought from multiple organizations representing individuals  
37  
38 with lived experience during the preparation phase regarding elements of its design to ensure its  
39  
40 findings would be of relevance to multiple groups including those with lived experience as well as  
41  
42 stakeholders actively engaged in initiatives related to seniors' health. Representatives from these  
43  
44 organizations will also be part of a planned stakeholder meeting further described below that will  
45  
46 inform prioritization of future research.  
47  
48  
49  
50  
51  
52  
53  
54  
55  
56  
57  
58  
59  
60

## DISCUSSION

### Knowledge translation strategies

Our review will use an integrated knowledge translation approach via the inclusion of our knowledge users (including representation from the Canadian Society of Addiction Medicine, the Canadian Coalition for Seniors' Mental Health, the National Initiative for the Care for the Elderly, the Seniors Health Knowledge Network, the Community Addictions Peer Support Association, Public Health Ontario and Ottawa Public Health) as collaborators throughout the review process. Input on review questions and scope was sought in the design of this protocol to ensure that our work would inform current practice and policy needs. Based upon discussion amongst research team members, a scoping review approach (as opposed to a systematic review) was universally considered most appropriate based upon the current uncertainty regarding the availability and nature of evidence of cannabis use specific to the population of older adults. We will continue to consult with our knowledge user collaborators throughout the process of the review on questions of clinical and methodological importance. Manuscripts resulting from the review will be published in open-access journals chosen by the research team. Lay summaries and knowledge mobilization products for people with lived experience, the community, and decision makers will be developed for dissemination on our knowledge users' websites.

### Implications

The findings from this review will form the foundation for a prioritization exercise with our knowledge users. Shortly after sharing our findings, we will present and discuss them with our knowledge users in a structured webinar. This will be followed by a survey of our knowledge users to establish their perspectives on future research priorities. An online Delphi process will further establish research priorities, as well as the appropriateness of designs for future research (i.e., the

1  
2  
3 conduct of de novo primary research to address knowledge gaps vs the performance of full  
4 systematic reviews to synthesize evidence, where it already exists).  
5  
6  
7

### 8 **Potential limitations and mitigation strategies**

9  
10 This scoping review addresses a very broad topic and a considerable volume of information is  
11 anticipated to be retrieved by our search strategy. Using an unrestricted search strategy would  
12 result in a retrieved volume of records that would be unmanageable with current software (i.e.,  
13 >120,000 references). We will mitigate this challenge in three ways: (1) imposing certain  
14 restrictions on the search strategy to reduce to volume of evidence, (2) using AI to aid in screening  
15 a large volume of references, and (3) stratifying our approach to screening and data charting  
16 according to study design, focusing initial intensive efforts on higher levels of evidence [43]. The  
17 use of AI for screening in systematic reviews has become of considerable interest in recent years  
18 [44,45], particularly in the presence of large citation volumes [46], and we will employ a  
19 conservative approach wherein this tool will not be responsible for any final decisions as to the  
20 inclusion status of a study.  
21  
22  
23  
24  
25  
26  
27  
28  
29  
30  
31  
32  
33  
34  
35  
36

37 Regarding the minimum age criteria to be used for this review (50+ years), this value was selected  
38 by the research team following discussions wherein there was a consensus anticipation that there  
39 may exist limited data in adults aged 65+ years. A reduction in the minimum age criteria was  
40 considered to allow for a conservative approach to include more data related to the group of older  
41 adults.  
42  
43  
44  
45  
46  
47  
48

49 To increase the transparency of our review methods, we will use the Open Science Framework to  
50 record any changes made to our protocol, as anticipated due to the iterative nature of scoping  
51 reviews.  
52  
53  
54  
55  
56  
57

1  
2  
3 Given the expected volume and heterogeneity of the charted evidence, we anticipate potential  
4 challenges in determining the most appropriate and useable method of reporting. We will maintain  
5 flexibility in the derivation of static tabular and graphical reporting methods, while communicating  
6 with our knowledge users regarding their needs. Provision of dynamic data options (i.e., Excel  
7 spreadsheets) will also be considered to allow greater usability of the data.  
8  
9  
10  
11  
12  
13  
14

15 Recent legalization of cannabis in several jurisdictions worldwide has made a collation of the  
16 available evidence regarding the beneficial and harmful impacts of cannabis use on health  
17 imperative. Older adults are a population demonstrating increased levels of cannabis use; however,  
18 the natural aging process may put older adults at risk of adverse health effects from cannabis that  
19 may outweigh any benefits realized. The proposed scoping review will map the evidence base  
20 specific to older adults to inform decisions related to clinical care, policy, and future research  
21 directions.  
22  
23  
24  
25  
26  
27  
28  
29  
30  
31  
32  
33  
34  
35  
36  
37  
38  
39  
40  
41  
42  
43  
44  
45  
46  
47  
48  
49  
50  
51  
52  
53  
54  
55  
56  
57  
58  
59  
60

## **FUNDING SOURCE**

This work was funded as a Catalyst Grant in 2019 by the Canadian Institutes of Health Research (CIHR) and the Canadian Centre for Substance Use and Addiction. The funders had no role in the development of the protocol.

## **ACKNOWLEDGEMENTS**

We thank Hanan Abramovici for his helpful comments and contributions to the development and review of this protocol.

## **CONTRIBUTIONS**

BH, KC and DW designed the review. DW prepared the first draft of the manuscript. BS created and tested the search strategies to be used in the bibliographic databases. KC, DR, MW and AS provided clinical expertise, and BH and CG provided review expertise during protocol development. All authors (DW, KC, DR, AS, SK, DC, MW, GG, JP, EM, BS, CG, KT, DM, BH) provided input in the planning of the study and also reviewed, provided comment, and approved the protocol and manuscript. BH conceived of and is the guarantor of the review.

## **COMPETING INTERESTS**

BH has previously received honoraria from Cornerstone Research Group for methodologic advice related to the conduct of systematic reviews and meta-analysis. No other authors have any competing interests to declare.



## REFERENCES

- [1] Rotermann M, Pagé M-M. Prevalence and correlates of non-medical only compared to self-defined medical and non-medical cannabis use, Canada, 2015. *Health Rep* 2018;29:3–13.
- [2] Hall W, Lynskey M. Evaluating the public health impacts of legalizing recreational cannabis use in the United States: Impacts of legalizing recreational cannabis use. *Addiction* 2016;111:1764–73. <https://doi.org/10.1111/add.13428>.
- [3] Hajizadeh M. Legalizing and Regulating Marijuana in Canada: Review of Potential Economic, Social, and Health Impacts. *Int J Health Policy Manag* 2016;5:453–6. <https://doi.org/10.15171/ijhpm.2016.63>.
- [4] Statistics Canada. National Cannabis Survey, first quarter 2019. Government of Canada; 2019.
- [5] Choi NG, DiNitto DM, Marti CN. Older marijuana users: Life stressors and perceived social support. *Drug Alcohol Depend* 2016;169:56–63. <https://doi.org/10.1016/j.drugalcdep.2016.10.012>.
- [6] Pacher P. The Endocannabinoid System as an Emerging Target of Pharmacotherapy. *Pharmacol Rev* 2006;58:389–462. <https://doi.org/10.1124/pr.58.3.2>.
- [7] Spindle TR, Bonn-Miller MO, Vandrey R. Changing landscape of cannabis: novel products, formulations, and methods of administration. *Curr Opin Psychol* 2019;30:98–102. <https://doi.org/10.1016/j.copsyc.2019.04.002>.
- [8] Le Boisselier R, Alexandre J, Lelong-Boulouard V, Debruyne D. Focus on cannabinoids and synthetic cannabinoids. *Clin Pharmacol Ther* 2017;101:220–9. <https://doi.org/10.1002/cpt.563>.
- [9] Health Canada, Santé Canada. Information for health care professionals: cannabis (marihuana, marijuana) and the cannabinoids : dried or fresh plant and oil administration by ingestion or other means psychoactive agent. 2018.
- [10] Lyness JM, Caine ED, King DA, Cox C, Yoediono Z. Psychiatric disorders in older primary care patients. *J Gen Intern Med* 1999;14:249–54. <https://doi.org/10.1046/j.1525-1497.1999.00326.x>.
- [11] Ward BW, Schiller JS. Prevalence of Multiple Chronic Conditions Among US Adults: Estimates From the National Health Interview Survey, 2010. *Prev Chronic Dis* 2013;10:120203. <https://doi.org/10.5888/pcd10.120203>.
- [12] DiNitto DM, Choi NG. Marijuana use among older adults in the U.S.A.: user characteristics, patterns of use, and implications for intervention. *Int Psychogeriatr* 2011;23:732–41. <https://doi.org/10.1017/S1041610210002176>.
- [13] Flint AJ, Merali Z, Vaccarino FJ. Improving Quality of Life: Substance Use and Aging. 2018.
- [14] Kelleher LM, Stough C, Sergejew AA, Rolfe T. The effects of cannabis on information-processing speed. *Addict Behav* 2004;29:1213–9. <https://doi.org/10.1016/j.addbeh.2004.03.039>.
- [15] Ranganathan M, D'Souza DC. The acute effects of cannabinoids on memory in humans: a review. *Psychopharmacology (Berl)* 2006;188:425–44. <https://doi.org/10.1007/s00213-006-0508-y>.
- [16] Kaag AM, Schulte MHJ, Jansen JM, van Wingen G, Homberg J, van den Brink W, et al. The relation between gray matter volume and the use of alcohol, tobacco, cocaine and cannabis in male polysubstance users. *Drug Alcohol Depend* 2018;187:186–94. <https://doi.org/10.1016/j.drugalcdep.2018.03.010>.

- 1  
2  
3 [17] Rotermann M, Sanmartin C, Hennessy D, Arthur M. Prescription medication use by  
4 Canadians aged 6 to 79. *Health Rep* 2014;25:9.
- 5 [18] Yamreudeewong W, Wong HK, Brausch LM, Pulley KR. Probable interaction between  
6 warfarin and marijuana smoking. *Ann Pharmacother* 2009;43:1347–53.  
7 <https://doi.org/10.1345/aph.1M064>.
- 8 [19] McLeod AL, McKenna CJ, Northridge DB. Myocardial infarction following the combined  
9 recreational use of Viagra and cannabis. *Clin Cardiol* 2002;25:133–4.  
10 <https://doi.org/10.1002/clc.4960250310>.
- 11 [20] Wilens TE, Biederman J, Spencer TJ. Case study: adverse effects of smoking marijuana  
12 while receiving tricyclic antidepressants. *J Am Acad Child Adolesc Psychiatry* 1997;36:45–8.  
13 <https://doi.org/10.1097/00004583-199701000-00016>.
- 14 [21] Kosel BW, Aweeka FT, Benowitz NL, Shade SB, Hilton JF, Lizak PS, et al. The effects of  
15 cannabinoids on the pharmacokinetics of indinavir and nelfinavir. *AIDS Lond Engl*  
16 2002;16:543–50.
- 17 [22] Mangoni AA, Jackson SHD. Age-related changes in pharmacokinetics and  
18 pharmacodynamics: basic principles and practical applications: Age-related changes in  
19 pharmacokinetics and pharmacodynamics. *Br J Clin Pharmacol* 2003;57:6–14.  
20 <https://doi.org/10.1046/j.1365-2125.2003.02007.x>.
- 21 [23] Aviram J, Samuelly-Leichtag G. Efficacy of Cannabis-Based Medicines for Pain  
22 Management: A Systematic Review and Meta-Analysis of Randomized Controlled Trials. *Pain*  
23 *Physician* 2017;20:E755–96.
- 24 [24] Lim K, See YM, Lee J. A Systematic Review of the Effectiveness of Medical Cannabis for  
25 Psychiatric, Movement and Neurodegenerative Disorders. *Clin Psychopharmacol Neurosci*  
26 *Off Sci J Korean Coll Neuropsychopharmacol* 2017;15:301–12.  
27 <https://doi.org/10.9758/cpn.2017.15.4.301>.
- 28 [25] Jouanjus E, Raymond V, Lapeyre-Mestre M, Wolff V. What is the Current Knowledge  
29 About the Cardiovascular Risk for Users of Cannabis-Based Products? A Systematic Review.  
30 *Curr Atheroscler Rep* 2017;19:26. <https://doi.org/10.1007/s11883-017-0663-0>.
- 31 [26] Nugent SM, Morasco BJ, O’Neil ME, Freeman M, Low A, Kondo K, et al. The Effects of  
32 Cannabis Among Adults With Chronic Pain and an Overview of General Harms: A Systematic  
33 Review. *Ann Intern Med* 2017;167:319–31. <https://doi.org/10.7326/M17-0155>.
- 34 [27] National Academies of Sciences, Engineering, and Medicine. The Health Effects of  
35 Cannabis and Cannabinoids: The Current State of Evidence and Recommendations for  
36 Research. Washington, DC: The National Academies Press; 2017.
- 37 [28] Pratt M, Stevens A, Thuku M, Butler C, Skidmore B, Wieland LS, et al. Benefits and harms  
38 of medical cannabis: a scoping review of systematic reviews. *Syst Rev* 2019;8:320.  
39 <https://doi.org/10.1186/s13643-019-1243-x>.
- 40 [29] van den Elsen G a. H, Ahmed AIA, Lammers M, Kramers C, Verkes RJ, van der Marck  
41 MA, et al. Efficacy and safety of medical cannabinoids in older subjects: a systematic review.  
42 *Ageing Res Rev* 2014;14:56–64. <https://doi.org/10.1016/j.arr.2014.01.007>.
- 43 [30] Arksey H, O’Malley L. Scoping studies: towards a methodological framework. *Int J Soc*  
44 *Res Methodol* 2005;8:19–32. <https://doi.org/10.1080/1364557032000119616>.
- 45 [31] Peters, MDJ, Godfrey, C, McInerney, P, Baldini Soares, C, Khalil, H, Parker D. Chapter  
46 11: Scoping Reviews. In: Aromataris E, Munn Z (Editors). *Joanna Briggs Institute Reviewer’s*  
47 *Manual*. 2017. <https://reviewersmanual.joannabriggs.org/> (accessed October 5, 2018).
- 48  
49  
50  
51  
52  
53  
54  
55  
56  
57  
58  
59  
60

- 1  
2  
3 [32] Levac D, Colquhoun H, O'Brien KK. Scoping studies: advancing the methodology. *Implement Sci* 2010;5:69. <https://doi.org/10.1186/1748-5908-5-69>.
- 4  
5 [33] Peters MDJ, Godfrey CM, Khalil H, McInerney P, Parker D, Soares CB. Guidance for  
6 conducting systematic scoping reviews. *Int J Evid Based Healthc* 2015;13:141–6.  
7 <https://doi.org/10.1097/XEB.0000000000000050>.
- 8  
9 [34] Thomas A, Lubarsky S, Durning SJ, Young ME. Knowledge Syntheses in Medical  
10 Education: Demystifying Scoping Reviews. *Acad Med J Assoc Am Med Coll* 2017;92:161–  
11 6. <https://doi.org/10.1097/ACM.0000000000001452>.
- 12  
13 [35] Mücke M, Weier M, Carter C, Copeland J, Degenhardt L, Cuhls H, et al. Systematic review  
14 and meta-analysis of cannabinoids in palliative medicine: Cannabinoids in palliative medicine.  
15 *J Cachexia Sarcopenia Muscle* 2018;9:220–34. <https://doi.org/10.1002/jesm.12273>.
- 16  
17 [36] Morales P, Reggio PH, Jagerovic N. An Overview on Medicinal Chemistry of Synthetic  
18 and Natural Derivatives of Cannabidiol. *Front Pharmacol* 2017;8.  
19 <https://doi.org/10.3389/fphar.2017.00422>.
- 20  
21 [37] McGowan J, Sampson M, Salzwedel DM, Cogo E, Foerster V, Lefebvre C. PRESS Peer  
22 Review of Electronic Search Strategies: 2015 Guideline Statement. *J Clin Epidemiol*  
23 2016;75:40–6. <https://doi.org/10.1016/j.jclinepi.2016.01.021>.
- 24  
25 [38] O'Blenis P. One Simple Way To Speed Up Your Screening Process 2017.  
26 <https://blog.evidencepartners.com/one-simple-way-to-speed-up-your-screening-process>  
27 (accessed May 21, 2019).
- 28  
29 [39] Higgins JPT, Green S, editors. *Cochrane Handbook for Systematic Reviews of*  
30 *Interventions Version 5.1.0 [updated March 2011] 2011.*
- 31  
32 [40] Shea BJ, Reeves BC, Wells G, Thuku M, Hamel C, Moran J, et al. AMSTAR 2: a critical  
33 appraisal tool for systematic reviews that include randomised or non-randomised studies of  
34 healthcare interventions, or both. *BMJ* 2017;358:j4008.
- 35  
36 [41] Arksey H, O'Malley L. Scoping studies: towards a methodological framework. *Int J Soc*  
37 *Res Methodol* 2005;8:19–32. <https://doi.org/10.1080/1364557032000119616>.
- 38  
39 [42] Tricco AC, Lillie E, Zarin W, O'Brien KK, Colquhoun H, Levac D, et al. PRISMA  
40 Extension for Scoping Reviews (PRISMA-ScR): Checklist and Explanation. *Ann Intern Med*  
41 2018. <https://doi.org/10.7326/M18-0850>.
- 42  
43 [43] Oxford Centre for Evidence-based Medicine. Levels of Evidence 2009.  
44 [https://www.cebm.net/2009/06/oxford-centre-evidence-based-medicine-levels-evidence-](https://www.cebm.net/2009/06/oxford-centre-evidence-based-medicine-levels-evidence-march-2009/)  
45 [march-2009/](https://www.cebm.net/2009/06/oxford-centre-evidence-based-medicine-levels-evidence-march-2009/) (accessed May 21, 2019).
- 46  
47 [44] Marshall IJ, Wallace BC. Toward systematic review automation: a practical guide to using  
48 machine learning tools in research synthesis. *Syst Rev* 2019;8:163.  
49 <https://doi.org/10.1186/s13643-019-1074-9>.
- 50  
51 [45] Wallace BC, Dahabreh IJ, Schmid CH, Lau J, Trikalinos TA. Modernizing the systematic  
52 review process to inform comparative effectiveness: tools and methods. *J Comp Eff Res*  
53 2013;2:273–82. <https://doi.org/10.2217/ceer.13.17>.
- 54  
55 [46] Shemilt I, Simon A, Hollands GJ, Marteau TM, Ogilvie D, O'Mara-Eves A, et al.  
56 Pinpointing needles in giant haystacks: use of text mining to reduce impractical screening  
57 workload in extremely large scoping reviews. *Res Synth Methods* 2014;5:31–49.  
58 <https://doi.org/10.1002/jrsm.1093>.
- 59  
60

1  
2  
3  
4 **APPENDICES TO:**  
5

6 The effects of medical and non-medical cannabis use in older adults: protocol for a scoping review.  
7 Wolfe DM et al.

- 8
- 9 • Appendix 1: PRISMA-P Checklist
  - 10 • Appendix 2: Search Strategy
  - 11 • Appendix 3: Sample tables for presentation of findings
- 12  
13  
14  
15  
16  
17  
18  
19  
20  
21  
22  
23  
24  
25  
26  
27  
28  
29  
30  
31  
32  
33  
34  
35  
36  
37  
38  
39  
40  
41  
42  
43  
44  
45  
46  
47  
48  
49  
50  
51  
52  
53  
54  
55  
56  
57  
58  
59  
60

## **Appendix 1. PRISMA-P Checklist**

**PRISMA-P (Preferred Reporting Items for Systematic review and Meta-Analysis Protocols) 2015 checklist: recommended items to address in a systematic review protocol\***

| <b>Section and topic</b>          | <b>Item No</b> | <b>Checklist item</b>                                                                                                                                                                           | <b>Page #</b> |
|-----------------------------------|----------------|-------------------------------------------------------------------------------------------------------------------------------------------------------------------------------------------------|---------------|
| <b>ADMINISTRATIVE INFORMATION</b> |                |                                                                                                                                                                                                 |               |
| Title:                            |                |                                                                                                                                                                                                 |               |
| Identification                    | 1a             | Identify the report as a protocol of a systematic review                                                                                                                                        | 1             |
| Update                            | 1b             | If the protocol is for an update of a previous systematic review, identify as such                                                                                                              |               |
| Registration                      | 2              | If registered, provide the name of the registry (such as PROSPERO) and registration number                                                                                                      | NA            |
| Authors:                          |                |                                                                                                                                                                                                 |               |
| Contact                           | 3a             | Provide name, institutional affiliation, e-mail address of all protocol authors; provide physical mailing address of corresponding author                                                       | 1             |
| Contributions                     | 3b             | Describe contributions of protocol authors and identify the guarantor of the review                                                                                                             | 23            |
| Amendments                        | 4              | If the protocol represents an amendment of a previously completed or published protocol, identify as such and list changes; otherwise, state plan for documenting important protocol amendments | 8             |
| Support:                          |                |                                                                                                                                                                                                 |               |
| Sources                           | 5a             | Indicate sources of financial or other support for the review                                                                                                                                   | 23            |
| Sponsor                           | 5b             | Provide name for the review funder and/or sponsor                                                                                                                                               | 23            |
| Role of sponsor or funder         | 5c             | Describe roles of funder(s), sponsor(s), and/or institution(s), if any, in developing the protocol                                                                                              | 23            |
| <b>INTRODUCTION</b>               |                |                                                                                                                                                                                                 |               |
| Rationale                         | 6              | Describe the rationale for the review in the context of what is already known                                                                                                                   | 4–7           |
| Objectives                        | 7              | Provide an explicit statement of the question(s) the review will address with reference to participants, interventions, comparators, and outcomes (PICO)                                        | 7             |
| <b>METHODS</b>                    |                |                                                                                                                                                                                                 |               |

|                                    |     |                                                                                                                                                                                                                                                  |              |
|------------------------------------|-----|--------------------------------------------------------------------------------------------------------------------------------------------------------------------------------------------------------------------------------------------------|--------------|
| Eligibility criteria               | 8   | Specify the study characteristics (such as PICO, study design, setting, time frame) and report characteristics (such as years considered, language, publication status) to be used as criteria for eligibility for the review                    | 8–12         |
| Information sources                | 9   | Describe all intended information sources (such as electronic databases, contact with study authors, trial registers or other grey literature sources) with planned dates of coverage                                                            | 12–13        |
| Search strategy                    | 10  | Present draft of search strategy to be used for at least one electronic database, including planned limits, such that it could be repeated                                                                                                       | 29–39        |
| Study records:                     |     |                                                                                                                                                                                                                                                  |              |
| Data management                    | 11a | Describe the mechanism(s) that will be used to manage records and data throughout the review                                                                                                                                                     | 14           |
| Selection process                  | 11b | State the process that will be used for selecting studies (such as two independent reviewers) through each phase of the review (that is, screening, eligibility and inclusion in meta-analysis)                                                  | 13–17        |
| Data collection process            | 11c | Describe planned method of extracting data from reports (such as piloting forms, done independently, in duplicate), any processes for obtaining and confirming data from investigators                                                           | 18           |
| Data items                         | 12  | List and define all variables for which data will be sought (such as PICO items, funding sources), any pre-planned data assumptions and simplifications                                                                                          | 18–20        |
| Outcomes and prioritization        | 13  | List and define all outcomes for which data will be sought, including prioritization of main and additional outcomes, with rationale                                                                                                             | 10–11, 19–20 |
| Risk of bias in individual studies | 14  | Describe anticipated methods for assessing risk of bias of individual studies, including whether this will be done at the outcome or study level, or both; state how this information will be used in data synthesis                             | 20           |
| Data synthesis                     | 15a | Describe criteria under which study data will be quantitatively synthesised                                                                                                                                                                      | NA           |
|                                    | 15b | If data are appropriate for quantitative synthesis, describe planned summary measures, methods of handling data and methods of combining data from studies, including any planned exploration of consistency (such as $I^2$ , Kendall's $\tau$ ) | NA           |
|                                    | 15c | Describe any proposed additional analyses (such as sensitivity or subgroup analyses, meta-regression)                                                                                                                                            | NA           |
|                                    | 15d | If quantitative synthesis is not appropriate, describe the type of summary planned                                                                                                                                                               | 20–21, 40–45 |
| Meta-bias(es)                      | 16  | Specify any planned assessment of meta-bias(es) (such as publication bias across studies, selective reporting within studies)                                                                                                                    | NA           |
| Confidence in cumulative evidence  | 17  | Describe how the strength of the body of evidence will be assessed (such as GRADE)                                                                                                                                                               | NA           |

**\* It is strongly recommended that this checklist be read in conjunction with the PRISMA-P Explanation and Elaboration (cite when available) for important clarification on the items. Amendments to a review protocol should be tracked and dated. The copyright for PRISMA-P (including checklist) is held by the PRISMA-P Group and is distributed under a Creative Commons Attribution Licence 4.0.**

*From: Shamseer L, Moher D, Clarke M, Ghersi D, Liberati A, Petticrew M, Shekelle P, Stewart L, PRISMA-P Group. Preferred reporting items for systematic review and meta-analysis protocols (PRISMA-P) 2015: elaboration and explanation. BMJ. 2015 Jan 2;349(jan02 1):g7647.*

## **Appendix 2. Search Strategy**

Cannabis

Final Strategy

Ovid Multifile

Database: Embase Classic+Embase <1947 to 2019 June 11>, Ovid MEDLINE(R) ALL <1946 to June 11, 2019>, PsycINFO <1806 to June Week 1 2019>

Search Strategy:

-----

- 1 Cannabis/ (47483)
- 2 exp Cannabinoids/ (82151)
- 3 Marijuana Abuse/ (10406)
- 4 exp "Marijuana Use"/ (14185)
- 5 Marijuana Smoking/ (7532)
- 6 ("c.indica" or "c.sativa" or cannabi\* or bhang or cannador or cbd or charas or eucannabinolide\* or ganja or ganjah or hash or hashish or hemp or marihuana\* or marijuana\*).tw,kf. (136291)
- 7 (epidiolex or gwp 42003p or gwp42003p or nabidiolex).tw,kf. (165)
- 8 (dronabinol or thc or tetrahydrocannabinol\* or ea 1477 or ea1477 or marinol or qcd 84924 or syndros or tetrabinex or tetranabinex).tw,kf. (24947)
- 9 (cesamet or nabilone).tw,kf. (979)
- 10 (deltanyne or "abbott 40566" or namisol or dronabinolum or "QCD 84924" or "CCRIS 4726").tw,kf. (27)
- 11 (nabiximol? or "gw 1000" or gw1000 or "sab 378" or sab378 or sativex).tw,kf. (1051)
- 12 (13956-29-1 or 19GBJ60SN5 or UNII-19GBJ60SN5 or ZYN002).rn,nm. (4791)
- 13 or/1-12 [CANNABIS] (170422)
- 14 exp Animals/ not (exp Animals/ and Humans/) (18640406)
- 15 13 not 14 [ANIMAL-ONLY REMOVED] (107451)
- 16 (comment or editorial or news or newspaper article).pt. (1925110)
- 17 (letter not (letter and randomized controlled trial)).pt. (2094822)
- 18 (case reports not (meta analysis or systematic review or controlled clinical trial or randomized controlled trial or pragmatic clinical trial or comparative study or observational study)).pt. (2003526)
- 19 (case report\* or case study or case studies).ti. not (meta analysis or systematic review or controlled clinical trial or randomized controlled trial or pragmatic clinical trial or comparative study or observational study).pt. (663973)
- 20 15 not (16 or 17 or 18 or 19) [OPINION PIECES AND CASE REPORTS REMOVED] (100750)
- 21 limit 20 to yr="2000-current" (73251)
- 22 limit 21 to systematic reviews [Limit not valid in Embase; records were retained] (27329)
- 23 meta analysis.pt. (101732)
- 24 exp meta-analysis as topic/ (57757)
- 25 (meta-analy\* or metanaly\* or metaanaly\* or met analy\* or integrative research or integrative review\* or integrative overview\* or research integration or research overview\* or collaborative review\*).tw,kf. (390079)
- 26 systematic review.pt. (107850)
- 27 (systematic review\* or systematic overview\* or evidence-based review\* or evidence-based overview\* or (evidence adj3 (review\* or overview\*)) or meta-review\* or meta-overview\* or meta-synthes\* or "review of reviews" or technology assessment\* or HTA or HTAs).tw,kf. (463074)
- 28 exp Technology assessment, biomedical/ (24267)
- 29 (cochrane or health technology assessment or evidence report).jw. (38382)
- 30 (network adj (MA or MAs)).tw,kf. (22)

1  
 2  
 3 31 (NMA or NMAs).tw,kf. (4839)  
 4 32 indirect\* compar\*.tw,kf. (5074)  
 5 33 (indirect treatment\* adj1 compar\*).tw,kf. (743)  
 6 34 (mixed treatment\* adj1 compar\*).tw,kf. (1323)  
 7 35 (multiple treatment\* adj1 compar\*).tw,kf. (373)  
 8 36 (multi-treatment\* adj1 compar\*).tw,kf. (5)  
 9 37 simultaneous\* compar\*.tw,kf. (2469)  
 10 38 mixed comparison?.tw,kf. (69)  
 11 39 or/23-38 (799947)  
 12 40 21 and 39 (1997)  
 13 41 22 or 40 [SRs/MAs] (27931)  
 14 42 (controlled clinical trial or randomized controlled trial or pragmatic clinical trial).pt. (572176)  
 15 43 clinical trials as topic.sh. (187251)  
 16 44 exp Randomized Controlled Trials as Topic/ (288357)  
 17 45 (randomi#ed or randomly or RCT or placebo\*).tw,kf. (2334678)  
 18 46 ((singl\* or doubl\* or trebl\* or tripl\*) adj (mask\* or blind\* or dumm\*)).tw,kf. (420279)  
 19 47 trial.ti. (507909)  
 20 48 or/42-47 (2953906)  
 21 49 21 and 48 [RCTS] (5693)  
 22 50 controlled clinical trial.pt. (93106)  
 23 51 Controlled Clinical Trial/ or Controlled Clinical Trials as Topic/ (570170)  
 24 52 (control\* adj2 trial\*).tw,kf. (616820)  
 25 53 Non-Randomized Controlled Trials as Topic/ (10630)  
 26 54 (nonrandom\* or non-random\* or quasi-random\* or quasi-experiment\*).tw,kf. (132402)  
 27 55 (nRCT or nRCT or non-RCT).tw,kf. (710)  
 28 56 Controlled Before-After Studies/ (214313)  
 29 57 (control\* adj3 ("before and after" or "before after")).tw,kf. (10168)  
 30 58 Interrupted Time Series Analysis/ (206520)  
 31 59 time series.tw,kf. (66339)  
 32 60 (pre- adj3 post-).tw,kf. (235905)  
 33 61 (pretest adj3 posttest).tw,kf. (18124)  
 34 62 Historically Controlled Study/ (224681)  
 35 63 (control\* adj2 stud\$3).tw,kf. (541007)  
 36 64 Control Groups/ (125963)  
 37 65 (control\* adj2 group\$1).tw,kf. (1235605)  
 38 66 trial.ti. (507909)  
 39 67 or/50-66 (3428538)  
 40 68 21 and 67 [NON-RCTS] (5249)  
 41 69 exp Cohort Studies/ (2337056)  
 42 70 cohort?.tw,kf. (1462096)  
 43 71 Retrospective Studies/ (1166307)  
 44 72 (longitudinal or prospective or retrospective).tw,kf. (3106077)  
 45 73 ((followup or follow-up) adj (study or studies)).tw,kf. (130193)  
 46 74 Observational study.pt. (62773)  
 47 75 (observation\$2 adj (study or studies)).tw,kf. (252177)  
 48 76 ((population or population-based) adj (study or studies or analys#s)).tw,kf. (40902)  
 49 77 ((multidimensional or multi-dimensional) adj (study or studies)).tw,kf. (371)  
 50 78 Comparative Study.pt. (1831731)  
 51 79 ((comparative or comparison) adj (study or studies)).tw,kf. (263134)  
 52 80 exp Case-Control Studies/ (1156584)  
 53 81 ((case-control\* or case-based or case-comparison) adj (study or studies)).tw,kf. (233233)



82 Cross-Sectional Studies/ (470673)  
 83 (cross-section\* or crosssection\*).tw,kf. (872615)  
 84 or/69-83 (8133205)  
 85 21 and 84 [OBSERVATIONAL STUDIES] (16552)  
 86 Qualitative Research/ (119259)  
 87 Interview/ (220812)  
 88 interview\*.mp. (1208372)  
 89 (theme\* or thematic).mp. (343144)  
 90 qualitative.af. (889955)  
 91 Nursing Methodology Research/ (30884)  
 92 questionnaire\*.mp. (1946523)  
 93 ethnological research.mp. (29)  
 94 ethnograph\*.mp. (49253)  
 95 ethnonursing.af. (363)  
 96 phenomenol\*.af. (165043)  
 97 (grounded adj (theor\* or study or studies or research or analys#s)).af. (78144)  
 98 (life stor\* or women\* stor\*).mp. (6740)  
 99 (emic or etic or hermeneutic\* or heuristic\* or semiotic\*).af. or (data adj1 saturat\*).tw. or participant  
 100 observ\*.tw. (141504)  
 101 (social construct\* or (postmodern\* or post-structural\*) or (post structural\* or poststructural\*) or  
 102 post modern\* or post-modern\* or feminis\* or interpret\*).mp. (1234463)  
 103 (action research or cooperative inquir\* or co operative inquir\* or co-operative inquir\*).mp.  
 104 (17587)  
 105 (humanistic or existential or experiential or paradigm\*).mp. (453321)  
 106 (field adj (study or studies or research)).tw. (43603)  
 107 human science.tw. (1161)  
 108 biographical method.tw. (103)  
 109 theoretical sampl\*.af. (2386)  
 110 ((purpos\* adj4 sampl\*) or (focus adj group\*)).af. (187736)  
 111 (account or accounts or unstructured or open-ended or open ended or text\* or narrative\*).mp.  
 112 (1691731)  
 113 (life world or life-world or conversation analys#s or personal experience\* or theoretical  
 114 saturation).mp. (83460)  
 115 ((lived or life) adj experience\*).mp. (67584)  
 116 observational method\*.af. (4965)  
 117 content analys#s.af. (111618)  
 118 (constant adj (comparative or comparison)).af. (14795)  
 119 ((discourse\* or discurs\*) adj3 analys#s).tw. (13049)  
 120 narrative analys#s.af. (9134)  
 121 (heidegger\* or colaizzi\* or spiegelberg\* or van manen\* or van kaam\* or merleau ponty\* or  
 122 husserl\* or foucault\* or (corbin adj2 strauss\*) or glaser\*).tw. (17480)  
 123 mixed method\*.tw,kf. (59378)  
 124 or/86-117 (6729977)  
 125 21 and 118 [QUALITATIVE STUDIES] (18936)  
 126 41 or 49 or 68 or 85 or 119 [ALL STUDY DESIGNS] (51581)  
 127 120 use medall [MEDLINE RECORDS] (15274)  
 128 cannabis/ (47483)  
 129 exp cannabinoid/ (69089)  
 130 cannabis addiction/ (9169)  
 131 exp "cannabis use"/ (9827)  
 132 cannabis addiction/ (9169)

1  
2  
3 127 cannabis sativa/ (8702)  
4 128 ("c.indica" or "c.sativa" or cannabi\* or bhang or cannador or cbd or charas or eucannabinolide\* or  
5 ganja or ganjah or hash or hashish or hemp or marihuana\* or marijuana\*).tw,kw. (137411)  
6 129 (epidiolex or gwp 42003p or gwp42003p or nabidiolex).tw,kw. (165)  
7 130 (dronabinol or thc or tetrahydrocannabinol\* or ea 1477 or ea1477 or marinol or qcd 84924 or  
8 syndros or tetrabinex or tetranabinex).tw,kw. (25260)  
9 131 (cesamet or nabilone).tw,kw. (993)  
10 132 (deltanyne or "abbott 40566" or namisol or dronabinolum or "QCD 84924" or "CCRIS  
11 4726").tw,kw. (27)  
12 133 (nabiximol? or "gw 1000" or gw1000 or "sab 378" or sab378 or sativex).tw,kw. (1065)  
13 134 (13956-29-1 or 19GBJ60SN5 or UNII-19GBJ60SN5 or ZYN002).rn. (4791)  
14 135 or/122-134 [CANNABIS] (170167)  
15 136 exp animal/ or exp animal experimentation/ or exp animal model/ or exp animal experiment/ or  
16 nonhuman/ or exp vertebrate/ (50765399)  
17 137 exp human/ or exp human experimentation/ or exp human experiment/ (38848166)  
18 138 136 not 137 (11918927)  
19 139 135 not 138 [ANIMAL-ONLY REMOVED] (137727)  
20 140 editorial.pt. (1097387)  
21 141 letter.pt. not (letter.pt. and randomized controlled trial/) (2089753)  
22 142 (case report\* or case study or case studies).ti. not (meta-analysis/ or "systematic review"/ or  
23 randomized controlled trial/ or controlled clinical trial/ or controlled study/ or time series analysis/ or  
24 cohort analysis/ or retrospective study/ or longitudinal study/ or prospective study/ or exp comparative  
25 study/ or observational study/ or exp case control study/ or cross-sectional study/) (647181)  
26 143 conference abstract.pt. (3430116)  
27 144 139 not (140 or 141 or 142 or 143) [OPINION PIECES, CASE REPORTS AND CONFERENCE  
28 ABSTRACTS REMOVED] (119468)  
29 145 limit 144 to yr="2000-current" (92402)  
30 146 meta-analysis/ (270155)  
31 147 "systematic review"/ (314772)  
32 148 "meta analysis (topic)"/ (39946)  
33 149 (meta-analy\* or metanaly\* or metaanaly\* or met analy\* or integrative research or integrative  
34 review\* or integrative overview\* or research integration or research overview\* or collaborative  
35 review\*).tw,kw. (393014)  
36 150 (systematic review\* or systematic overview\* or evidence-based review\* or evidence-based  
37 overview\* or (evidence adj3 (review\* or overview\*)) or meta-review\* or meta-overview\* or meta-  
38 synthes\* or "review of reviews" or technology assessment\* or HTA or HTAs).tw,kw. (466451)  
39 151 biomedical technology assessment/ (23156)  
40 152 (cochrane or health technology assessment or evidence report).jw. (38382)  
41 153 (network adj (MA or MAs)).tw,kw. (22)  
42 154 (NMA or NMAs).tw,kw. (4857)  
43 155 indirect\* compar\*.tw,kw. (5140)  
44 156 (indirect treatment\* adj1 compar\*).tw,kw. (747)  
45 157 (mixed treatment\* adj1 compar\*).tw,kw. (1347)  
46 158 (multiple treatment\* adj1 compar\*).tw,kw. (379)  
47 159 (multi-treatment\* adj1 compar\*).tw,kw. (5)  
48 160 simultaneous\* compar\*.tw,kw. (2469)  
49 161 mixed comparison?.tw,kw. (70)  
50 162 or/146-161 (866096)  
51 163 145 and 162 [REVIEWS] (3255)  
52 164 randomized controlled trial/ or controlled clinical trial/ (1311919)  
53 165 "clinical trial (topic)"/ (101825)  
54  
55  
56  
57  
58  
59  
60

1  
2  
3 166 "randomized controlled trial (topic)"/ (161519)  
4 167 (randomi#ed or randomly or RCT or placebo\*).tw,kw. (2336720)  
5 168 ((singl\* or doubl\* or trebl\* or tripl\*) adj (mask\* or blind\* or dumm\*)),tw,kw. (420435)  
6 169 trial.ti. (507909)  
7 170 or/164-169 (3096931)  
8 171 145 and 170 [RCTS] (8046)  
9 172 controlled clinical trial/ (556323)  
10 173 "controlled clinical trial (topic)"/ (10128)  
11 174 (control\* adj2 trial\*).tw,kw. (620815)  
12 175 (nonrandom\* or non-random\* or quasi-random\* or quasi-experiment\*).tw,kw. (132629)  
13 176 (nRCT or nRCT or non-RCT).tw,kw. (711)  
14 177 (control\* adj3 ("before and after" or "before after")).tw,kw. (10173)  
15 178 time series analysis/ (23336)  
16 179 time series.tw,kw. (67114)  
17 180 pretest posttest control group design/ (388)  
18 181 (pre- adj3 post-).tw,kw. (235933)  
19 182 (pretest adj3 posttest).tw,kw. (18127)  
20 183 controlled study/ (6713848)  
21 184 (control\* adj2 stud\$3).tw,kw. (542508)  
22 185 control group/ (125963)  
23 186 (control\* adj2 group\$1).tw,kw. (1235369)  
24 187 trial.ti. (507909)  
25 188 or/172-187 (8856567)  
26 189 145 and 188 [NON-RCTS] (17004)  
27 190 cohort analysis/ (714392)  
28 191 cohort?.tw,kw. (1464380)  
29 192 retrospective study/ (1537235)  
30 193 longitudinal study/ (250984)  
31 194 prospective study/ (1031600)  
32 195 (longitudinal or prospective or retrospective).tw,kw. (3111465)  
33 196 follow up/ (1448744)  
34 197 ((followup or follow-up) adj (study or studies)).tw,kw. (132011)  
35 198 observational study/ (231986)  
36 199 (observation\$2 adj (study or studies)).tw,kw. (252792)  
37 200 population research/ (99974)  
38 201 ((population or population-based) adj (study or studies or analys#s)).tw,kw. (48926)  
39 202 ((multidimensional or multi-dimensional) adj (study or studies)).tw,kw. (372)  
40 203 exp comparative study/ (3194802)  
41 204 ((comparative or comparison) adj (study or studies)).tw,kw. (261543)  
42 205 exp case control study/ (1156584)  
43 206 ((case-control\* or case-based or case-comparison) adj (study or studies)).tw,kw. (234698)  
44 207 cross-sectional study/ (598245)  
45 208 (cross-section\* or crosssection\*).tw,kw. (874654)  
46 209 or/190-208 (10058649)  
47 210 145 and 209 [OBSERVATIONAL STUDIES] (23782)  
48 211 exp qualitative research/ (125102)  
49 212 exp interview/ (285894)  
50 213 interview\*.mp. (1208372)  
51 214 (theme\* or thematic).mp. (343144)  
52 215 qualitative.af. (889955)  
53 216 nursing methodology research/ (30884)  
54  
55  
56  
57  
58  
59

- 1  
2  
3 217 questionnaire\*.mp. (1946523)  
4 218 ethnological research.mp. (29)  
5 219 ethnograph\*.mp. (49253)  
6 220 ethnosing.af. (363)  
7 221 phenomenol\*.af. (165043)  
8 222 (grounded adj (theor\* or study or studies or research or analys#s)).af. (78144)  
9 223 (life stor\* or women\* stor\*).mp. (6740)  
10 224 (emic or etic or hermeneutic\* or heuristic\* or semiotic\*).af. or (data adj1 saturat\*).tw. or  
11 participant observ\*.tw. (141504)  
12 225 (social construct\* or (postmodern\* or post-structural\*) or (post structural\* or poststructural\*) or  
13 post modern\* or post-modern\* or feminis\* or interpret\*).mp. (1234463)  
14 226 (action research or cooperative inquir\* or co operative inquir\* or co-operative inquir\*).mp.  
15 (17587)  
16 227 (humanistic or existential or experiential or paradigm\*).mp. (453321)  
17 228 (field adj (study or studies or research)).tw. (43603)  
18 229 human science.tw. (1161)  
19 230 biographical method.tw. (103)  
20 231 theoretical sampl\*.af. (2386)  
21 232 ((purpos\* adj4 sampl\* or (focus adj group\*)).af. (187736)  
22 233 (account or accounts or unstructured or open-ended or open ended or text\* or narrative\*).mp.  
23 (1691731)  
24 234 (life world or life-world or conversation analys#s or personal experience\* or theoretical  
25 saturation).mp. (83460)  
26 235 ((lived or life) adj experience\*).mp. (67584)  
27 236 observational method\*.af. (4965)  
28 237 content analys#s.af. (111618)  
29 238 (constant adj (comparative or comparison)).af. (14795)  
30 239 ((discourse\* or discours\*) adj3 analys#s).tw. (13049)  
31 240 narrative analys#s.af. (9134)  
32 241 (heidegger\* or colaizzi\* or spiegelberg\* or van manen\* or van kaam\* or merleau ponty\* or  
33 husserl\* or foucault\* or (corbin adj2 strauss\*) or glaser\*).tw. (17480)  
34 242 mixed method\*.tw,kw. (59805)  
35 243 or/211-242 (6739667)  
36 244 145 and 243 [QUALITATIVE STUDIES] (23300)  
37 245 163 or 171 or 189 or 210 or 244 [ALL STUDY DESIGNS] (50209)  
38 246 245 use emczd [EMBASE RECORDS] (25229)  
39 247 exp Cannabis/ (50168)  
40 248 exp Cannabinoids/ (82151)  
41 249 Marijuana Usage/ (2717)  
42 250 ("c.indica" or "c.sativa" or cannabi\* or bhang or cannador or cbd or charas or eucannabinolide\* or  
43 ganja or ganjah or hash or hashish or hemp or marihuana\* or marijuana\*).tw. (135754)  
44 251 (epidiox or gwp 42003p or gwp42003p or nabidiox).tw. (164)  
45 252 (dronabinol or thc or tetrahydrocannabinol\* or ea 1477 or ea1477 or marinol or qcd 84924 or  
46 syndros or tetrabinex or tetranabinex).tw. (24784)  
47 253 (cesamet or nabilone).tw. (975)  
48 254 (deltanyne or "abbott 40566" or namisol or dronabinolum or "QCD 84924" or "CCRIS 4726").tw.  
49 (26)  
50 255 (nabiximol? or "gw 1000" or gw1000 or "sab 378" or sab378 or sativex).tw. (1040)  
51 256 or/247-255 [CANNABIS] (167465)  
52 257 limit 256 to yr="2000-current" (130951)  
53  
54  
55  
56  
57  
58  
59  
60

1  
2  
3 258 limit 257 to ("0830%2509%2509systematic review" or 1200 meta analysis or 1300 metasyntesis)  
4 [Limit not valid in Embase,Ovid MEDLINE(R),Ovid MEDLINE(R) Daily Update,Ovid MEDLINE(R)  
5 In-Process,Ovid MEDLINE(R) Publisher,PsycINFO; records were retained] (111540)  
6 259 meta analysis/ (270155)  
7 260 (meta-analy\* or metanaly\* or metaanaly\* or met analy\* or integrative research or integrative  
8 review\* or integrative overview\* or research integration or research overview\* or collaborative  
9 review\*).tw. (388820)  
10 261 "systematic review"/ (314772)  
11 262 (systematic review\* or systematic overview\* or evidence-based review\* or evidence-based  
12 overview\* or (evidence adj3 (review\* or overview\*)) or meta-review\* or meta-overview\* or meta-  
13 synthes\* or "review of reviews" or technology assessment\* or HTA or HTAs).tw. (461287)  
14 263 (network adj (MA or MAs)).tw. (22)  
15 264 (NMA or NMAs).tw. (4824)  
16 265 indirect\* compar\*.tw. (5052)  
17 266 (indirect treatment\* adj1 compar\*).tw. (725)  
18 267 (mixed treatment\* adj1 compar\*).tw. (1267)  
19 268 (multiple treatment\* adj1 compar\*).tw. (360)  
20 269 (multi-treatment\* adj1 compar\*).tw. (5)  
21 270 simultaneous\* compar\*.tw. (2469)  
22 271 mixed comparison?.tw. (69)  
23 272 or/259-271 (811715)  
24 273 257 and 272 (3419)  
25 274 258 or 273 [REVIEWS] (111936)  
26 275 limit 257 to "0300 clinical trial" [Limit not valid in Embase,Ovid MEDLINE(R),Ovid  
27 MEDLINE(R) Daily Update,Ovid MEDLINE(R) In-Process,Ovid MEDLINE(R) Publisher; records were  
28 retained] (111666)  
29 276 exp clinical trials/ (307124)  
30 277 (randomi#ed or randomly or RCT or placebo\*).tw. (2332689)  
31 278 ((singl\* or doubl\* or trebl\* or tripl\*) adj (mask\* or blind\* or dumm\*)).tw. (420183)  
32 279 trial.ti. (507909)  
33 280 or/276-279 (2730358)  
34 281 257 and 280 (9191)  
35 282 275 or 281 [RCTS] (112919)  
36 283 (control\* adj2 trial\*).tw. (614352)  
37 284 (nonrandom\* or non-random\* or quasi-random\* or quasi-experiment\*).tw. (132248)  
38 285 (nRCT or nRCT or non-RCT).tw. (709)  
39 286 (control\* adj3 ("before and after" or "before after")).tw. (10162)  
40 287 time series/ (23361)  
41 288 time series.tw. (65880)  
42 289 (pre- adj3 post-).tw. (235815)  
43 290 (pretest adj3 posttest).tw. (18118)  
44 291 (control\* adj2 stud\$3).tw. (540018)  
45 292 experiment controls/ (907)  
46 293 (control\* adj2 group\$1).tw. (1235251)  
47 294 trial.ti. (507909)  
48 295 or/283-294 (2833768)  
49 296 257 and 295 [NON-RCTS] (7783)  
50 297 limit 257 to ("0430 followup study" or "0450 longitudinal study" or "0451 prospective study" or  
51 "0453 retrospective study") [Limit not valid in Embase,Ovid MEDLINE(R),Ovid MEDLINE(R) Daily  
52 Update,Ovid MEDLINE(R) In-Process,Ovid MEDLINE(R) Publisher; records were retained] (113931)  
53 298 cohort?.tw. (1460179)  
54  
55  
56  
57  
58  
59  
60

1  
 2  
 3 299 exp longitudinal studies/ (267415)  
 4 300 retrospective studies/ (1166307)  
 5 301 (longitudinal or prospective or retrospective).tw. (3101143)  
 6 302 followup studies/ (627480)  
 7 303 ((followup or follow-up) adj (study or studies)).tw. (128839)  
 8 304 exp observation methods/ (5724)  
 9 305 (observation\$2 adj (study or studies)).tw. (251407)  
 10 306 ((population or population-based) adj (study or studies or analys#s)).tw. (40364)  
 11 307 ((multidimensional or multi-dimensional) adj (study or studies)).tw. (371)  
 12 308 ((comparative or comparison) adj (study or studies)).tw. (258365)  
 13 309 ((case-control\* or case-based or case-comparison) adj (study or studies)).tw. (232321)  
 14 310 (cross-section\* or crosssection\*).tw. (871622)  
 15 311 or/298-310 (6229379)  
 16 312 257 and 311 (21156)  
 17 313 297 or 312 [OBSERVATIONAL STUDIES] (116189)  
 18 314 interview\*.mp. (1208372)  
 19 315 thematic analysis/ (12832)  
 20 316 qualitative.af. (889955)  
 21 317 questionnaire\*.mp. (1946523)  
 22 318 ethnological research.mp. (29)  
 23 319 ethnograph\*.mp. (49253)  
 24 320 ethnonsursing.af. (363)  
 25 321 phenomenol\*.af. (165043)  
 26 322 grounded theory/ (10853)  
 27 323 (grounded adj (theor\* or study or studies or research or analys#s)).af. (78144)  
 28 324 exp life experiences/ (51768)  
 29 325 (life stor\* or women\* stor\*).mp. (6740)  
 30 326 (emic or etic or hermeneutic\* or heuristic\* or semiotic\*).af. or (data adj1 saturat\*).tw. or  
 31 participant observ\*.tw. (141504)  
 32 327 (social construct\* or (postmodern\* or post-structural\*) or (post structural\* or poststructural\*) or  
 33 post modern\* or post-modern\* or feminis\* or interpret\*).mp. (1234463)  
 34 328 (action research or cooperative inquir\* or co operative inquir\* or co-operative inquir\*).mp.  
 35 (17587)  
 36 329 (humanistic or existential or experiential or paradigm\*).mp. (453321)  
 37 330 (field adj (study or studies or research)).tw. (43603)  
 38 331 human science.tw. (1161)  
 39 332 biographical method.tw. (103)  
 40 333 theoretical sampl\*.af. (2386)  
 41 334 ((purpos\* adj4 sampl\* or (focus adj group\*)).af. (187736)  
 42 335 (account or accounts or unstructured or open-ended or open ended or text\* or narrative\*).mp.  
 43 (1691731)  
 44 336 (life world or life-world or conversation analys#s or personal experience\* or theoretical  
 45 saturation).mp. (83460)  
 46 337 ((lived or life) adj experience\*).mp. (67584)  
 47 338 observational method\*.af. (4965)  
 48 339 content analys#s.af. (111618)  
 49 340 (constant adj (comparative or comparison)).af. (14795)  
 50 341 ((discourse\* or discours\*) adj3 analys#s).tw. (13049)  
 51 342 narrative analys#s.af. (9134)  
 52 343 (heidegger\* or colaizzi\* or spiegelberg\* or van manen\* or van kaam\* or merleau ponty\* or  
 53 husserl\* or foucault\* or (corbin adj2 strauss\*) or glaser\*).tw. (17480)  
 54  
 55  
 56  
 57  
 58  
 59  
 60

1  
2  
3 344 mixed method\*.tw. (59032)  
4 345 or/314-344 (6636676)  
5 346 257 and 345 [QUALITATIVE STUDIES] (26698)  
6 347 274 or 282 or 296 or 313 or 346 [ALL STUDY DESIGNS] (122411)  
7 348 347 use medall,emczd (111415)  
8 349 347 not 348 [PSYCINFO RECORDS] (10996)  
9 350 121 or 246 or 349 [ALL STUDY DESIGNS - ALL DATABASES] (51499)  
10 351 41 use medall [MEDLINE REVIEWS] (1327)  
11 352 163 use emczd [EMBASE REVIEWS] (1765)  
12 353 274 use medall,emczd (111415)  
13 354 274 not 353 [PSYCINFO REVIEWS] (521)  
14 355 351 or 352 or 354 [REVIEWS - ALL DATABASES] (3613)  
15 356 remove duplicates from 355 (2316) [TOTAL UNIQUE REVIEWS]  
16 357 356 use medall [MEDLINE UNIQUE REVIEWS] (1314)  
17 358 356 use emczd [EMBASE UNIQUE REVIEWS] (853)  
18 359 356 not (357 or 358) [PSYCINFO UNIQUE REVIEWS] (149)  
19 360 49 use medall [MEDLINE RCTS] (2766)  
20 361 171 use emczd [EMBASE RCTS] (4104)  
21 362 282 use medall,emczd (111415)  
22 363 282 not 362 [PSYCINFO RCTS] (1504)  
23 364 360 or 361 or 363 [RCTS - ALL DATABASES] (8374)  
24 365 limit 364 to yr="2012-current" (4981)  
25 366 remove duplicates from 365 (2954)  
26 367 364 not 365 (3393)  
27 368 remove duplicates from 367 (2013)  
28 369 366 or 368 [TOTAL UNIQUE RCTS] (4967)  
29 370 369 use medall [MEDLINE UNIQUE RCTS] (2751)  
30 371 369 use emczd [EMBASE UNIQUE RCTS] (1881)  
31 372 369 not (370 or 371) [PSYCINFO UNIQUE RCTS] (335)  
32 373 68 use medall [MEDLINE NRCTS] (2156)  
33 374 189 use emczd [EMBASE NRCTS] (13613)  
34 375 296 use medall,emczd (6496)  
35 376 296 not 375 [PSYCINFO NRCTS] (1287)  
36 377 373 or 374 or 376 [NRCTS - ALL DATABASES] (17056)  
37 378 85 use medall [MEDLINE OBSERVATIONAL STUDIES] (9014)  
38 379 210 use emczd [EMBASE OBSERVATIONAL STUDIES] (11318)  
39 380 313 use medall,emczd (111415)  
40 381 313 not 380 [PSYCINFO OBSERVATIONAL STUDIES] (4774)  
41 382 378 or 379 or 381 [OBSERVATIONAL STUDIES - ALL DATABASES] (25106)  
42 383 377 or 382 [NRCTS, OBSERVATIONAL STUDIES - ALL DATABASES] (35890)  
43 384 limit 383 to yr="2018-current" (5258)  
44 385 remove duplicates from 384 (3489)  
45 386 limit 383 to yr="2016-2017" (5786)  
46 387 remove duplicates from 386 (3556)  
47 388 limit 383 to yr="2014-2015" (5227)  
48 389 remove duplicates from 388 (3216)  
49 390 limit 383 to yr="2012-2013" (4289)  
50 391 remove duplicates from 390 (2631)  
51 392 limit 383 to yr="2009-2011" (5305)  
52 393 remove duplicates from 392 (3349)  
53 394 limit 383 to yr="2005-2008" (5699)  
54  
55  
56  
57  
58  
59  
60

1  
 2  
 3 395 remove duplicates from 394 (3749)  
 4 396 limit 383 to yr="2000-2004" (4326)  
 5 397 remove duplicates from 396 (2919)  
 6 398 385 or 387 or 389 or 391 or 393 or 395 or 397 [TOTAL UNIQUE NRCTS, OBSERVATIONAL  
 7 STUDIES] (22909)  
 8 399 398 use medall [MEDLINE UNIQUE NRCTS, OBSERVATIONAL STUDIES] (10253)  
 9 400 398 use emczd [EMBASE UNIQUE NRCTS, OBSERVATIONAL STUDIES] (11250)  
 10 401 398 not (399 or 400) [PSYCINFO UNIQUE NRCTS, OBSERVATIONAL STUDIES] (1406)  
 11 402 119 use medall [MEDLINE QUALITATIVE STUDIES] (6892)  
 12 403 244 use emczd [EMBASE QUALITATIVE STUDIES] (9063)  
 13 404 346 use medall,emczd (18959)  
 14 405 346 not 404 [PSYCINFO QUALITATIVE STUDIES] (7739)  
 15 406 402 or 403 or 405 [QUALITATIVE STUDIES - ALL DATABASES] (23694)  
 16 407 limit 406 to yr="2017-current" (4897)  
 17 408 remove duplicates from 407 (3033)  
 18 409 limit 406 to yr="2014-2016" (5456)  
 19 410 remove duplicates from 409 (3388)  
 20 411 limit 406 to yr="2010-2013" (5531)  
 21 412 remove duplicates from 411 (3350)  
 22 413 limit 406 to yr="2005-2009" (4995)  
 23 414 remove duplicates from 413 (3056)  
 24 415 limit 406 to yr="2000-2004" (2816)  
 25 416 remove duplicates from 415 (1737)  
 26 417 408 or 410 or 412 or 414 or 416 [TOTAL UNIQUE QUALITATIVE STUDIES - ALL  
 27 DATABASES] (14563)  
 28 418 417 use medall [MEDLINE UNIQUE QUALITATIVE STUDIES] (6877)  
 29 419 417 use emczd [EMBASE UNIQUE QUALITATIVE STUDIES] (3597)  
 30 420 417 not (418 or 419) [PSYCINFO UNIQUE QUALITATIVE STUDIES] (4089)

31  
32  
33 \*\*\*\*\*

34  
35 Cochrane Library

36  
37 [https://www-cochranelibrary-com.proxy.bib.uottawa.ca/advanced-search/search-](https://www-cochranelibrary-com.proxy.bib.uottawa.ca/advanced-search/search-manager?search=3084048)  
 38 [manager?search=3084048](https://www-cochranelibrary-com.proxy.bib.uottawa.ca/advanced-search/search-manager?search=3084048)  
 39

40  
41 Search Name: Cannabis - Final  
 42 Date Run: 13/06/2019 01:27:59  
 43 Comment: OHRI - 2019 Jun 12  
 44

45 ID Search Hits  
 46 #1 [mh Cannabis] 290  
 47 #2 [mh Cannabinoids] 731  
 48 #3 [mh "Marijuana Abuse"] 524  
 49 #4 [mh "Marijuana Use"] 284  
 50 #5 [mh "Marijuana Smoking"] 276  
 51 #6 ("c.indica" or "c.sativa" or cannabi\* or bhang or cannador or cbd or charas or eucannabinolide\*  
 52 or ganja or ganjah or hash or hashish or hemp or marihuana\* or marijuana\*):ti,ab,kw 4028  
 53 #7 (epidiolox or gwp 42003p or gwp42003p or nabidiolox):ti,ab,kw 30  
 54 #8 (dronabinol or thc or tetrahydrocannabinol\* or ea 1477 or ea1477 or marinol or qcd 84924 or  
 55 syndros or tetrabinex or tetranabinex):ti,ab,kw 1387  
 56  
 57  
 58  
 59



1  
2  
3 #9 (cesamet or nabilone):ti,ab,kw 142  
4 #10 (deltanyne or "abbott 40566" or namisol or dronabinolum or "QCD 84924" or "CCRIS  
5 4726"):ti,ab,kw 16  
6 #11 (nabiximol\* or "gw 1000" or gw1000 or "sab 378" or sab378 or sativex):ti,ab,kw 167  
7 #12 {or #1-#11} with Publication Year from 2000 to 2019, in Trials 3638  
8 #13 {or #1-#11} in Cochrane Reviews, Cochrane Protocols 45  
9 #14 #12 OR #13 3683  
10

11 Reviews – 42

12 Protocols – 3

13 Trials – 3638  
14  
15  
16  
17  
18  
19  
20  
21  
22  
23  
24  
25  
26  
27  
28  
29  
30  
31  
32  
33  
34  
35  
36  
37  
38  
39  
40  
41  
42  
43  
44  
45  
46  
47  
48  
49  
50  
51  
52  
53  
54  
55  
56  
57  
58  
59  
60

**Appendix 3. Sample tables for presentation of findings**

**Table 1. Sample table depicting the presence/absence of demographic subgroups in observational studies.**

| Study              | Age groups |       |     | Sex/gender |       |       | Race/ethnicity |       |            |       |       |    | Marital status |        |          |         |    | Employment status |         |    | Accommodation status |        |    | Residential setting |            |     |    |  |
|--------------------|------------|-------|-----|------------|-------|-------|----------------|-------|------------|-------|-------|----|----------------|--------|----------|---------|----|-------------------|---------|----|----------------------|--------|----|---------------------|------------|-----|----|--|
|                    | 50-64      | 65-74 | 75+ | Men        | Women | Other | Caucasian      | Black | Indigenous | Asian | Other | NR | Married        | Single | Divorced | Widowed | NR | Retired           | Working | NR | Alone                | Shared | NR | Community           | Retirement | LTC | NR |  |
| Lee et al., 2012   |            |       |     |            |       |       |                |       |            |       |       |    |                |        |          |         |    |                   |         |    |                      |        |    |                     |            |     |    |  |
| Smith et al., 2017 |            |       |     |            |       |       |                |       |            |       |       |    |                |        |          |         |    |                   |         |    |                      |        |    |                     |            |     |    |  |

**Table 2. Sample table depicting the presence/absence of comorbidities and co-use in observational studies**

| Study              | Mental health comorbidities |            |          |               |                   |      |    | Physical comorbidities |              |          |                    |    | Co-use           |               |           |    |
|--------------------|-----------------------------|------------|----------|---------------|-------------------|------|----|------------------------|--------------|----------|--------------------|----|------------------|---------------|-----------|----|
|                    | Anxiety                     | Depression | Insomnia | Schizophrenia | Cognitive decline | PTSD | NR | Cancer                 | Chronic pain | Diabetes | Multiple sclerosis | NR | Prescribed drugs | Illicit drugs | No co-use | NR |
| Lee et al., 2012   |                             |            |          |               |                   |      |    |                        |              |          |                    |    |                  |               |           |    |
| Smith et al., 2017 |                             |            |          |               |                   |      |    |                        |              |          |                    |    |                  |               |           |    |

**Table 3. Sample table of types of cannabis use, products, and modes of consumption in observational studies**

| Study              | Cannabis use |             |       |    | Cannabis product |           |    | Mode of consumption |            |         |      |    |
|--------------------|--------------|-------------|-------|----|------------------|-----------|----|---------------------|------------|---------|------|----|
|                    | Medical      | Non-medical | Mixed | NR | Natural          | Synthetic | NR | Smoking             | Vaporizing | Edibles | Oils | NR |
| Lee et al., 2012   |              |             |       |    |                  |           |    |                     |            |         |      |    |
| Smith et al., 2017 |              |             |       |    |                  |           |    |                     |            |         |      |    |

1  
2  
3  
4  
5  
6  
7  
8  
9  
10  
11  
12  
13  
14  
15  
16  
17  
18  
19  
20  
21  
22  
23  
24  
25  
26  
27  
28  
29  
30  
31  
32  
33  
34  
35  
36  
37  
38  
39  
40  
41  
42  
43  
44  
45  
46  
47

**Table 4. Sample table of types of comparisons evaluated in primary studies**

| Study              | Comparison evaluated        |               |                  |             |                             |                     |
|--------------------|-----------------------------|---------------|------------------|-------------|-----------------------------|---------------------|
|                    | Use-only (single-arm study) | Use vs no use | Frequency of use | Strain type | Concentration of THC or CBD | Mode of consumption |
| Lee et al., 2012   |                             |               |                  |             |                             |                     |
| Smith et al., 2017 |                             |               |                  |             |                             |                     |

**Table 5. Sample table of all outcomes and direction of effects for observational studies. This table will likely be split into four, tables depending on outcomes reported: mental health/behavioural, physical health, brain, and pharmacokinetic outcomes. Green cells indicate a positive effect, red cells a negative effect, and grey cells a non-significant effect was found. Blank/white cells indicate an outcome was not measured.**

| Study and comparison<br><br>(Reference group is listed second) | Mental health/behavioural |            |                           |          |                 |                            | Physical health |               |       |           | Brain outcomes |                        |                         |                    |              |                  | Pharmacokinetic outcomes  |                                      |                                 |
|----------------------------------------------------------------|---------------------------|------------|---------------------------|----------|-----------------|----------------------------|-----------------|---------------|-------|-----------|----------------|------------------------|-------------------------|--------------------|--------------|------------------|---------------------------|--------------------------------------|---------------------------------|
|                                                                | Anxiety                   | Depression | Manic/ suicidal behaviour | Paranoia | Risky behaviour | New substance use disorder | Chronic pain    | Car accidents | Falls | ED visits | Gray matter    | White matter integrity | Functional connectivity | Cortical thickness | Total volume | Regional volumes | Surface morphometry/shape | Interactions with prescription drugs | Interactions with illicit drugs |
| Lee et al., 2012<br>Use vs no use                              | Green                     | Green      | Grey                      | White    | White           | Green                      | Grey            | White         | White | Grey      | White          | White                  | White                   | White              | White        | White            | White                     | White                                | White                           |
| Lee et al., 2012<br>High vs low conc of THC                    | Green                     | Green      | Green                     | White    | White           | Green                      | Grey            | White         | White | Green     | White          | White                  | White                   | White              | White        | White            | White                     | White                                | White                           |
| Lee et al., 2012                                               | Grey                      | Grey       | Grey                      | White    | White           | Grey                       | Grey            | White         | White | Grey      | White          | White                  | White                   | White              | White        | White            | White                     | White                                | White                           |

| Study and comparison<br><br>(Reference group is listed second) | Mental health/behavioural |            |                           |          |                 |                            | Physical health |               |       |           | Brain outcomes |                        |                         |                    |              |                  | Pharmacokinetic outcomes  |                                      |                                 |
|----------------------------------------------------------------|---------------------------|------------|---------------------------|----------|-----------------|----------------------------|-----------------|---------------|-------|-----------|----------------|------------------------|-------------------------|--------------------|--------------|------------------|---------------------------|--------------------------------------|---------------------------------|
|                                                                | Anxiety                   | Depression | Manic/ suicidal behaviour | Paranoia | Risky behaviour | New substance use disorder | Chronic pain    | Car accidents | Falls | ED visits | Gray matter    | White matter integrity | Functional connectivity | Cortical thickness | Total volume | Regional volumes | Surface morphometry/shape | Interactions with prescription drugs | Interactions with illicit drugs |
| Smoking vs vaping                                              |                           |            |                           |          |                 |                            |                 |               |       |           |                |                        |                         |                    |              |                  |                           |                                      |                                 |
| Smith et al., 2017<br><br>Daily vs weekly use                  |                           |            |                           |          |                 |                            |                 |               |       |           |                |                        |                         |                    |              |                  |                           |                                      |                                 |
| Smith et al., 2017<br><br>High vs low conc of THC              |                           |            |                           |          |                 |                            |                 |               |       |           |                |                        |                         |                    |              |                  |                           |                                      |                                 |
